# Supplementary material
Source: MDPI journal article supplement (https://www.mdpi.com/2073-8994/14/5/989)

# Organocatalytic asymmetric halocyclization of allylic amides to chiral oxazolines using DTBM-SEGPHOS – Mechanistic implications from Hammett plots

Fotini Moschona <sup>1</sup>, Christina Misirlaki <sup>1</sup>, Nikolaos Karadimas <sup>1</sup>, Maria Koutiva <sup>1</sup>, Ioanna Savvopoulou <sup>1</sup> and Gerasimos Rassias <sup>1,\*</sup>

<sup>1</sup> Department of Chemistry, University of Patras, 26504 Patra, Greece; fmoschona@windowslive.com (F.M.); christine.misirlaki@gmail.com (C.M.); nick.m.karadimas@gmail.com (N.K.); up1061281@upnet.gr (M.K.); joanna\_savv@hotmail.com (I.S)

\*Correspondence: rassiasg@upatras.gr

## SUPPLEMENTARY INFORMATION

### Synthesis of tert-butyl (2-(3-(trifluoromethyl)phenyl)allyl)carbamate (4a) –

#### General procedure for Heck reaction

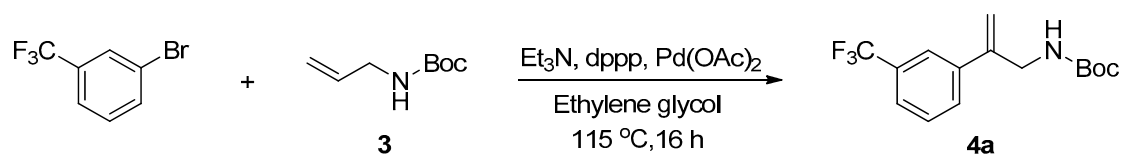

In an oven-dried 100 mL round-bottom flask equipped with a magnetic stir bar were added 500 mg *tert*-Butyl allylcarbamate (**3**) (3.18 mmol, 1eq), 535  $\mu$ L 3-bromobenzotrifluoride (858 mg, 3.82 mmol, 1.2 eq), 21.4 mg palladium (II) acetate (3 mol%), 78.7 mg 1,3-Bis(diphenylphosphino)propane (6 mol%) and 7.5 mL degassed ethylene glycol (overall 0.42M). The reaction mixture was degassed under N<sub>2</sub> atmosphere. 881.5  $\mu$ L (6.36 mmol, 2 eq) of triethylamine was added under N<sub>2</sub> atmosphere and the reaction was stirred at 115 °C for 16 h and monitored by HPLC. At completion, the solution was cooled to room temperature and 75 mL of water was added. The aqueous phase was extracted with EtOAc (3  $\times$  15 mL). The organic phases were combined and washed with 0.1M HCl (2  $\times$  12 mL), aq. NaHCO<sub>3</sub> 5% wt/wt (1  $\times$  12 mL) and brine (1  $\times$  12 mL). The organic phase was dried over Na<sub>2</sub>SO<sub>4</sub>. Charcoal (150 mg) was added and

the mixture was stirred at 60 °C for 2 h. After filtration through Celite™ the solvent was removed under reduced pressure to afford an oily residue.

**tert-butyl (2-phenylallyl)carbamate (4b)**

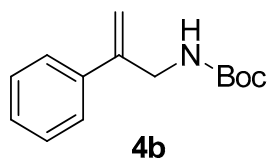

Prepared according to the general procedure for the Heck reaction.

**tert-butyl (2-(4-fluorophenyl)allyl)carbamate (4c)**

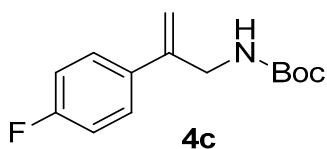

Prepared according to the general procedure for the Heck reaction.

**tert-butyl (2-(4-(isobutylcarbamoyl)phenyl)allyl)carbamate (4d)**

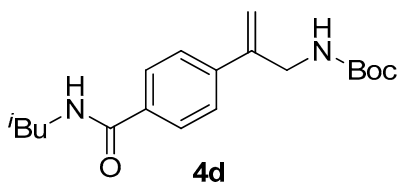

Prepared according to the general procedure for the Heck reaction.

**tert-butyl (2-(4-(trifluoromethyl)phenyl)allyl)carbamate (4e)**

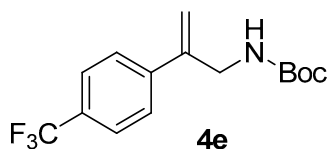

Prepared according to the general procedure for the Heck reaction.

**tert-butyl (2-(4-cyanophenyl)allyl)carbamate (4f)**

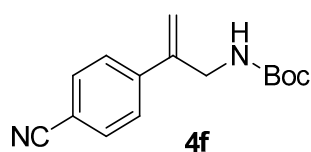

Prepared according to the general procedure for the Heck reaction.

**tert-butyl (2-(3-methoxyphenyl)allyl)carbamate (4g)**

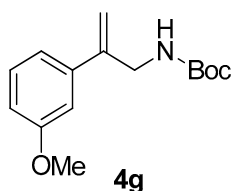

Prepared according to the general procedure for the Heck reaction.

**tert-butyl (2-(3-cyanophenyl)allyl)carbamate (4h)**

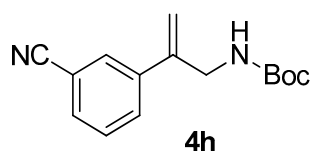

Prepared according to the general procedure for the Heck reaction.

**tert-butyl (2-(4-(morpholinosulfonyl)phenyl)allyl)carbamate (4i)**

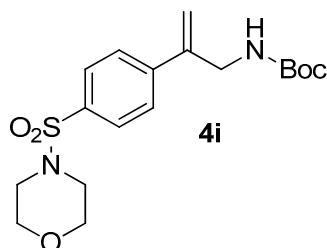

Prepared according to the general procedure for the Heck reaction.

**tert-butyl (2-(pyridin-3-yl)allyl)carbamate (4j)**

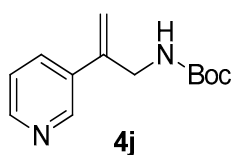

Prepared according to the general procedure for the Heck reaction.

**tert-butyl (2-(naphthalen-1-yl)allyl)carbamate (4k)**

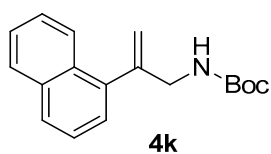

Prepared according to the general procedure for the Heck reaction.

**tert-butyl (2-(quinolin-6-yl)allyl)carbamate (4l)**

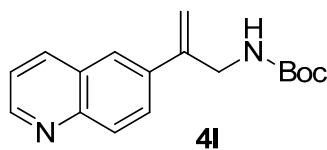

Prepared according to the general procedure for the Heck reaction.

2-(3-(trifluoromethyl)phenyl)prop-2-en-1-amine (5a) – General procedure for Boc deprotection

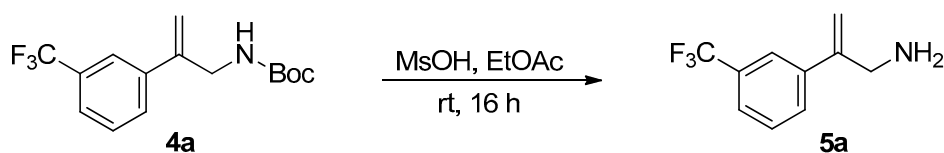

In a 10 mL round-bottom flask equipped with magnetic stir bar were added 318.4 mg *tert*-butyl (2-(3-(trifluoromethyl)phenyl)allyl)carbamate (**4a**) (1.0567 mmol, 1 eq) and dissolved in 1.9 mL EtOAc (0.56M). Next, 82.3  $\mu$ L methanesulfonic acid (121.85 mg, 1.268 mmol, 1.2 eq) were added in the flask and the reaction was stirred for 16 h at room temperature and monitored by HPLC. The solvent was removed under reduced pressure and the residue was dissolved in 3 mL TBME (0.35 M) and extracted with 1M HCl (3  $\times$  4 mL). The aqueous phases were combined and the pH was adjusted to 11-12. The aqueous phase was then extracted with DCM (3  $\times$  4 mL). The organic phases were combined and dried over Na<sub>2</sub>SO<sub>4</sub>. The solvent was removed under reduced pressure to afford the product as an oil.

Overall yield for the Heck reaction and Boc deprotection: 192 mg (30%)

<sup>1</sup>H NMR (600 MHz, CDCl<sub>3</sub>)  $\delta$  7.66 (s, 1H), 7.59 (d, *J* = 7.7 Hz, 1H), 7.54 (d, *J* = 7.8 Hz, 1H), 7.46 (t, *J* = 7.8 Hz, 1H), 5.41 (d, *J* = 0.5 Hz, 1H), 5.34 (d, *J* = 0.5 Hz, 1H), 3.73 (s, 2H)

<sup>13</sup>C NMR (151 MHz, CDCl<sub>3</sub>)  $\delta$  148.52, 140.69, 130.76 (q, *J* = 33.2 Hz), 129.39, 128.91, 124.32 (q, *J* = 3.02 Hz), 123.20 (q, *J* = 272.5 Hz), 122.96 (q, *J* = 3.9 Hz), 112.92, 45.95

(ESI) calculated for C<sub>11</sub>H<sub>15</sub>F<sub>3</sub>NO<sub>3</sub>S [M+H]<sup>+</sup> requires 202.0765, found 202.0780

### 2-phenylprop-2-en-1-amine (5b)

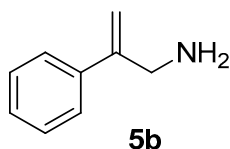

Prepared according to the general procedure for Boc deprotection.

Overall yield from Heck procedure and Boc deprotection: 40%

The product could not be fully purified; The corresponding cyclized derivative however has been purified and the characterization is provided below.

(ESI) calculated for  $C_9H_{12}N$   $[M+H]^+$  requires 134.0891, found 134.0887

### 2-(4-fluorophenyl)prop-2-en-1-amine (5c)

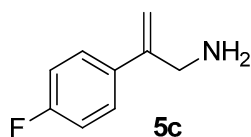

Prepared according to the general procedure for Boc deprotection.

Overall yield from Heck procedure and Boc deprotection: 31%

$^1H$  NMR (600 MHz,  $CDCl_3$ )  $\delta$  7.39 – 7.36 (m, 2H), 7.05 – 7.01 (m, 2H), 5.30 (s, 1H), 5.22 (s, 1H), 3.68 (d,  $J$  = 7.9 Hz, 2H)

$^{13}C$  NMR (151 MHz,  $CDCl_3$ )  $\delta$  160.83 (d,  $J$  = 242.1 Hz), 130.66 (d,  $J$  = 9.06 Hz), 128.64 (d,  $J$  = 12.08 Hz), 127.78, 115.42 (d,  $J$  = 22.65 Hz), 114.33, 41.80

(ESI) calculated for  $C_9H_{11}FN$   $[M+H]^+$  requires 151.0797, found 151.0802

**2-(4-(isobutylcarbamoyl)phenyl)prop-2-en-1-aminium methanesulfonate**

**(5d)**

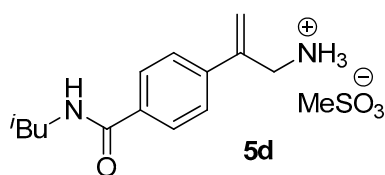

Prepared according to the general procedure for Boc deprotection. The product was isolated as its mesylate salt by filtration from the reaction without further purification.

Overall yield for the Heck reaction and Boc deprotection: 40%

$^1\text{H}$  NMR (600 MHz, DMSO)  $\delta$  8.48 (t,  $J$  = 5.7 Hz, 1H), 8.11 (s, 3H), 7.87 (d,  $J$  = 8.4 Hz, 2H), 7.58 (d,  $J$  = 8.4 Hz, 2H), 5.77 (s, 1H), 5.43 (s, 1H), 3.96 (d,  $J$  = 5.5 Hz, 2H), 3.07 (dd,  $J$  = 13.3, 7.0 Hz, 2H), 1.83 (dt,  $J$  = 13.5, 6.8 Hz, 1H), 0.87 (d,  $J$  = 6.7 Hz, 6H)

$^{13}\text{C}$  NMR (151 MHz, DMSO)  $\delta$  166.05, 140.63, 140.30, 134.88, 127.95, 126.21, 116.94, 47.15, 41.64, 40.20, 28.55, 20.65

(ESI) calculated for  $\text{C}_{15}\text{H}_{25}\text{N}_2\text{O}_4\text{S}$   $[\text{M}+\text{H}]^+$  requires 328.1452, found 328.1449

**2-(4-(trifluoromethyl)phenyl)prop-2-en-1-aminium mesylate (5e)**

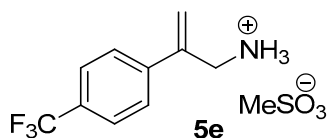

Prepared according to the general procedure for Boc deprotection. The product was isolated as its mesylate salt by filtration from the reaction without further purification.

Overall yield for the Heck reaction and Boc deprotection: 35%

$^1\text{H}$  NMR (600 MHz, DMSO)  $\delta$  8.17 (s, 3H), 7.76 (q,  $J$  = 8.5 Hz, 4H), 5.82 (s, 1H), 5.53 (s, 1H), 4.00 (s, 2H), 2.35 (s, 3H)

$^{13}\text{C}$  NMR (151 MHz, DMSO)  $\delta$  142.07, 140.24, 128.99 (q,  $J$  = 32.01 Hz), 127.32, 125.93 (q,  $J$  = 4.53 Hz), 125.52 (q,  $J$  = 271.8 Hz), 118.37, 41.62

(ESI) calculated for  $\text{C}_{10}\text{H}_{11}\text{F}_3\text{N}$   $[\text{M}+\text{H}]^+$  requires 329.0539, found 329.0555

#### **4-(3-aminoprop-1-en-2-yl)benzonitrile (5f)**

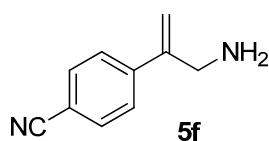

Prepared according to the general procedure for Boc deprotection.

Overall yield for the Heck reaction and Boc deprotection: 43%

$^1\text{H}$  NMR (600 MHz,  $\text{CDCl}_3$ )  $\delta$  7.63 (d, 2H), 7.52 (d, 2H), 5.46 (s, 1H), 5.39 (s, 1H), 3.72 (d, 2H)

$^{13}\text{C}$  NMR (151 MHz,  $\text{CDCl}_3$ )  $\delta$  148.05, 144.44, 132.28, 126.79, 118.80, 114.36, 111.24, 45.67

(ESI) calculated for  $\text{C}_{10}\text{H}_{11}\text{N}_2$   $[\text{M}+\text{H}]^+$  requires 159.0844, found 159.0841

#### **2-(3-methoxyphenyl)prop-2-en-1-amine (5g)**

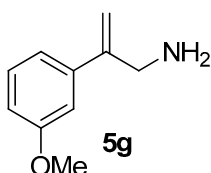

Prepared according to the general procedure for Boc deprotection.

Overall yield for the Heck reaction and Boc deprotection: 25%

$^1\text{H}$  NMR (600 MHz,  $\text{CDCl}_3$ )  $\delta$  7.26 (dd,  $J = 9.0, 6.9$  Hz, 1H), 7.00 (d,  $J = 7.7$  Hz, 1H), 6.96 – 6.93 (m, 1H), 6.84 (dt,  $J = 8.1, 4.0$  Hz, 1H), 5.34 (s, 1H), 5.22 (s, 1H), 3.82 (s,  $J = 4.9$  Hz, 2H), 3.70 (s, 2H)

(ESI) calculated for  $\text{C}_{10}\text{H}_{14}\text{NO}$   $[\text{M}+\text{H}]^+$  requires 163.0997, found 163.0988

### **3-(3-aminoprop-1-en-2-yl)benzonitrile (5h)**

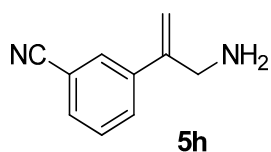

Prepared according to the general procedure for Boc deprotection.

Overall yield for the Heck reaction and Boc deprotection: 55%

$^1\text{H}$  NMR (600 MHz,  $\text{CDCl}_3$ )  $\delta$  7.70 (s, 1H), 7.64 (d,  $J = 7.9$  Hz, 1H), 7.56 (d,  $J = 7.7$  Hz, 1H), 7.45 (t,  $J = 7.8$  Hz, 1H), 5.41 (s, 1H), 5.36 (s, 1H), 3.71 (s, 2H)

$^{13}\text{C}$  NMR (151 MHz,  $\text{CDCl}_3$ )  $\delta$  147.64, 141.15, 131.06, 130.48, 129.85, 129.27, 118.77, 113.64, 112.69, 45.80

(ESI) calculated for  $\text{C}_{10}\text{H}_{11}\text{N}_2$   $[\text{M}+\text{H}]^+$  requires 159.0844, found 159.0839

### **2-(4-(morpholinosulfonyl)phenyl)prop-2-en-1-amine (5i)**

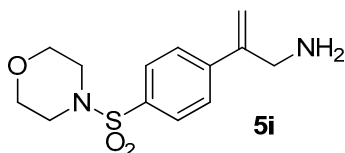

Prepared according to the general procedure for Boc deprotection.

Overall yield for the Heck reaction and Boc deprotection: 30%

$^1\text{H}$  NMR (600 MHz,  $\text{CDCl}_3$ )  $\delta$  7.72 (d,  $J$  = 8.4 Hz, 2H), 7.59 (d,  $J$  = 8.3 Hz, 2H), 5.49 (s, 1H), 5.41 (s, 1H), 3.77 – 3.73 (m, 6H), 3.04 – 3.00 (m, 4H)

(ESI) calculated for  $\text{C}_{13}\text{H}_{19}\text{N}_2\text{O}_3\text{S}$   $[\text{M}+\text{H}]^+$  requires 283.1038, found 283.1035

### **2-(pyridin-3-yl)prop-2-en-1-amine (5j)**

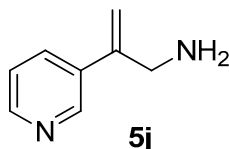

Prepared according to general procedure for Boc deprotection.

Overall yield from for the Heck reaction and Boc deprotection: 60%

$^1\text{H}$  NMR (600 MHz,  $\text{CDCl}_3$ )  $\delta$  8.69 (d,  $J$  = 2.0 Hz, 1H), 8.53 (dd,  $J$  = 4.8, 1.4 Hz, 1H), 7.74 – 7.69 (m, 1H), 7.30 – 7.27 (m, 1H), 5.42 (s, 1H), 5.36 (s, 1H), 3.73 (s, 2H)

$^{13}\text{C}$  NMR (151 MHz,  $\text{CDCl}_3$ )  $\delta$  160.97, 149.09, 147.40, 141.21, 133.53, 123.37, 115.96, 41.36

(ESI) calculated for  $\text{C}_8\text{H}_{11}\text{N}_2$   $[\text{M}+\text{H}]^+$  requires 135.0844, found 135.0849

### **2-(naphthalen-1-yl)prop-2-en-1-amine (5k)**

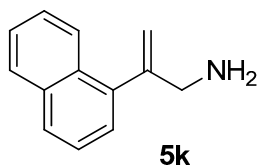

Prepared according to the general procedure for Boc deprotection.

The product could not be fully purified; Derivatives thereof characterized by NMR are provided below.

Overall yield for the Heck reaction and Boc deprotection: 65%

(ESI) calculated for  $C_{13}H_{14}N$   $[M+H]^+$  requires 184.1048, found 184.1045

### 2-(quinolin-6-yl)prop-2-en-1-amine (5l)

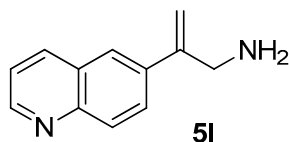

Prepared according to general procedure for Boc deprotection.

Overall yield from Heck procedure and Boc deprotection: 40%

$^1H$  NMR (600 MHz,  $CDCl_3$ )  $\delta$  8.88 (dd,  $J$  = 4.2, 1.6 Hz, 1H), 8.14 (d,  $J$  = 8.4 Hz, 1H), 8.07 (d,  $J$  = 8.7 Hz, 1H), 7.82 (dd,  $J$  = 10.9, 2.1 Hz, 2H), 7.38 (dd,  $J$  = 8.2, 4.2 Hz, 1H), 5.53 (s, 1H), 5.38 (s, 1H), 3.83 (s, 2H)

$^{13}C$  NMR (151 MHz,  $CDCl_3$ )  $\delta$  150.35, 148.80, 147.93, 137.78, 136.20, 129.55, 128.22, 126.53, 124.41, 121.40, 112.84, 46.07

(ESI) calculated for  $C_{12}H_{13}N_2$   $[M+H]^+$  requires 185.1000, found 185.1007

### Synthesis of 4-nitro-N-(2-(3-(trifluoromethyl)phenyl)allyl)benzamide (6g) – General procedure A for amide formation from benzoyl chlorides

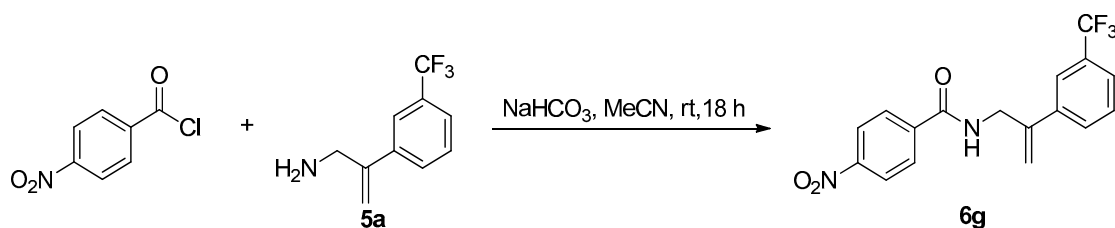

In a 10 mL round-bottom flask equipped with magnetic stir bar were added 50 mg 2-(3-(trifluoromethyl)phenyl)prop-2-en-1-amine (**5a**) (0.2485 mmol, 1 eq) and dissolved in 0.3 mL MeCN (0.08 M). Next, 27.2 mg  $NaHCO_3$  (0.323 mmol, 1.3 eq) and 46 mg 4-nitrobenzyl chloride (0.2485 mmol, 1 eq) were added in the

flask and the reaction was stirred for 16 h at room temperature and monitored by HPLC. At completion, the solvent was removed under reduced pressure and the crude was dissolved in 2 mL EtOAc. The organic phase was washed with 0.1M HCl (2 × 0.5 mL), aq. NaHCO<sub>3</sub> 5% wt/wt (0.5 mL) and brine (0.5 mL). The organic phase was dried over Na<sub>2</sub>SO<sub>4</sub>. The solvent was removed under reduced pressure to afford an oil residue.

Isolated yield: 51 mg (59%)

<sup>1</sup>H NMR (600 MHz, CDCl<sub>3</sub>) δ 8.27 (d, *J* = 8.8 Hz, 2H), 7.89 (d, *J* = 8.7 Hz, 2H), 7.73 (s, 1H), 7.67 (d, *J* = 7.8 Hz, 1H), 7.60 (d, *J* = 7.7 Hz, 1H), 7.51 (t, *J* = 7.8 Hz, 1H), 6.38 (s, 1H), 5.62 (s, 1H), 5.44 (s, 1H), 4.60 (d, *J* = 5.7 Hz, 2H)

<sup>13</sup>C NMR (151 MHz, CDCl<sub>3</sub>) δ 165.48, 149.63, 142.84, 139.74, 138.91, 130.96 (q, *J* = 33.22 Hz), 129.30, 129.18, 128.11, 124.92 (q, *J* = 4.53 Hz), 123.83, 123.05 (q, *J* = 271.8 Hz), 122.92 (q, *J* = 4.53 Hz), 115.91, 43.70

(ESI) calculated for C<sub>17</sub>H<sub>14</sub>F<sub>3</sub>N<sub>2</sub>O<sub>3</sub> [M+H]<sup>+</sup> requires 350.0878, found 350.0881

### **N-(2-(3-(trifluoromethyl)phenyl)allyl)benzamide (6c)**

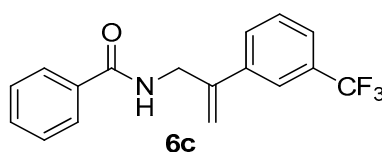

Prepared according to the general procedure for amide formation A.

Isolated yield: 71%

<sup>1</sup>H NMR (600 MHz, CDCl<sub>3</sub>) δ 7.74 (d, *J* = 8.0 Hz, 3H), 7.68 (d, *J* = 7.8 Hz, 1H), 7.58 (d, *J* = 7.7 Hz, 1H), 7.53 – 7.47 (m, 2H), 7.43 (t, *J* = 7.7 Hz, 2H), 6.28 (s, *J* = 31.2 Hz, 1H), 5.59 (s, 1H), 5.43 (s, 1H), 4.58 (d, *J* = 5.8 Hz, 2H)

$^{13}\text{C}$  NMR (151 MHz,  $\text{CDCl}_3$ )  $\delta$  167.41, 143.37, 139.22, 134.25, 131.63, 130.91 (q,  $J$  = 33.22 Hz), 129.35, 129.08, 128.62, 126.85, 124.74 (q,  $J$  = 4.53 Hz), 123.12 (q,  $J$  = 270.3 Hz), 122.97 (q,  $J$  = 4.53 Hz), 115.41, 43.42

(ESI) calculated for  $\text{C}_{17}\text{H}_{15}\text{F}_3\text{NO}$   $[\text{M}+\text{H}]^+$  requires 306.1027, found 306.1030

**4-bromo-N-(2-(3-(trifluoromethyl)phenyl)allyl)benzamide (6e)**

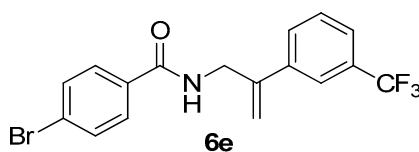

Prepared according to general procedure for amide formation A.

Isolated yield: 63%

$^1\text{H}$  NMR (600 MHz,  $\text{CDCl}_3$ )  $\delta$  7.72 (s, 1H), 7.64 (d,  $J$  = 7.8 Hz, 1H), 7.60 – 7.53 (m, 5H), 7.47 (t,  $J$  = 7.8 Hz, 1H), 6.17 (s, 1H), 5.57 (s, 1H), 5.40 (s, 1H), 4.54 (d,  $J$  = 5.7 Hz, 2H)

$^{13}\text{C}$  NMR (151 MHz,  $\text{CDCl}_3$ )  $\delta$  166.46, 143.17, 139.08, 133.01, 131.87, 130.93 (q,  $J$  = 33.22 Hz), 129.32, 129.12, 128.48, 126.36, 124.81 (q,  $J$  = 4.53 Hz), 123.08 (q,  $J$  = 272.3 Hz), 122.96 (q,  $J$  = 4.53 Hz), 115.59, 43.50

(ESI) calculated for  $\text{C}_{17}\text{H}_{14}\text{BrF}_3\text{NO}$   $[\text{M}+\text{H}]^+$  requires 384.0133, found 384.0129

**N-(2-phenylallyl)benzamide (6h)**

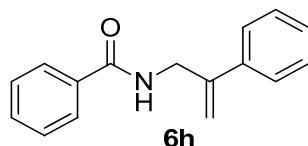

Prepared according to general procedure for amide formation A.

Isolated yield: 70%

$^1\text{H}$  NMR (600 MHz,  $\text{CDCl}_3$ )  $\delta$  7.70 (d, 2H), 7.48 (t, 3H), 7.40 (t,  $J = 7.6$  Hz, 2H), 7.36 (t,  $J = 10.2, 4.7$  Hz, 2H), 7.31 (t, 1H), 6.20 (s, 1H), 5.52 (s, 1H), 5.32 (s, 1H), 4.54 (d,  $J = 5.5$  Hz, 2H)

$^{13}\text{C}$  NMR (151 MHz,  $\text{CDCl}_3$ )  $\delta$  167.34, 144.25, 138.29, 134.45, 131.49, 128.60, 128.57, 128.13, 126.87, 126.09, 114.11, 43.75

(ESI) calculated for  $\text{C}_{16}\text{H}_{16}\text{NO}$   $[\text{M}+\text{H}]^+$  requires 238.1154, found 238.1149

**N-(2-(4-fluorophenyl)allyl)benzamide (6i)**

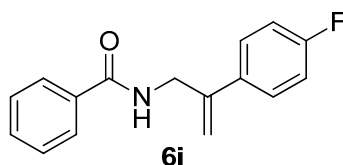

Prepared according to general procedure for amide formation A.

Isolated yield: 75%

$^1\text{H}$  NMR (600 MHz,  $\text{CDCl}_3$ )  $\delta$  7.73 – 7.70 (m, 2H), 7.53 (t,  $J = 7.8$  Hz, 1H), 7.48 – 7.45 (m, 2H), 7.41 (t,  $J = 7.6$  Hz, 2H), 7.06 – 7.01 (m, 2H), 6.28 – 6.14 (m, 1H), 5.46 (s, 1H), 5.30 (s, 1H), 4.52 (d,  $J = 5.7$  Hz, 2H)

$^{13}\text{C}$  NMR (151 MHz,  $\text{CDCl}_3$ )  $\delta$  161.82 (d,  $J = 241.6$  Hz), 143.38 (d,  $J = 4.53$  Hz), 134.35, 131.57, 130.56, 128.87, 128.59, 127.78 (d,  $J = 7.55$  Hz), 126.86, 115.38 (d,  $J = 21.14$  Hz), 113.97, 43.73

(ESI) calculated for  $\text{C}_{16}\text{H}_{15}\text{FNO}$   $[\text{M}+\text{H}]^+$  requires 255.1059, found 255.1063

**4-(3-benzamidoprop-1-en-2-yl)-N-isobutylbenzamide (6j)**

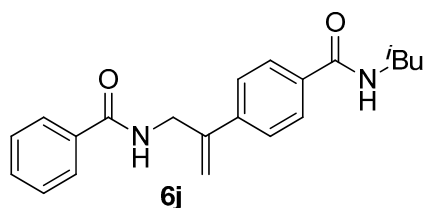

Prepared according to general procedure for amide formation A.

Isolated yield: 85%

$^1\text{H}$  NMR (600 MHz,  $\text{CDCl}_3$ )  $\delta$  7.72 (t,  $J$  = 7.1 Hz, 4H), 7.50 (d,  $J$  = 8.1 Hz, 2H), 7.47 (d,  $J$  = 7.3 Hz, 1H), 7.39 (t,  $J$  = 7.5 Hz, 2H), 6.40 (s, 1H), 6.29 (s, 1H), 5.56 (s, 1H), 5.37 (s, 1H), 4.52 (d,  $J$  = 5.4 Hz, 2H), 3.26 (t,  $J$  = 6.3 Hz, 2H), 1.89 (dt,  $J$  = 13.3, 6.6 Hz, 1H), 0.96 (d,  $J$  = 6.6 Hz, 7H)

$^{13}\text{C}$  NMR (151 MHz,  $\text{CDCl}_3$ )  $\delta$  167.40, 167.14, 143.55, 141.26, 134.34, 134.23, 131.60, 128.59, 127.15, 126.90, 126.22, 115.38, 47.36, 43.47, 28.61, 20.16

(ESI) calculated for  $\text{C}_{21}\text{H}_{25}\text{N}_2\text{O}_2$   $[\text{M}+\text{H}]^+$  requires 336.1838, found 336.1841

**N-(2-(4-(trifluoromethyl)phenyl)allyl)benzamide (6k)**

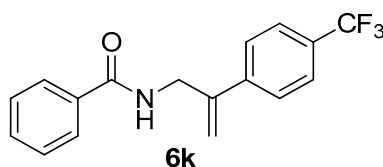

Prepared according to general procedure for amide formation A.

Isolated yield: 55%

$^1\text{H}$  NMR (600 MHz,  $\text{CDCl}_3$ )  $\delta$  7.74 (d,  $J$  = 7.4 Hz, 2H), 7.62 (d,  $J$  = 2.6 Hz, 4H), 7.52 (t,  $J$  = 7.2 Hz, 1H), 7.44 (t,  $J$  = 7.5 Hz, 2H), 6.25 (s, 1H), 5.61 (s, 1H), 5.45 (s, 1H), 4.58 (d,  $J$  = 5.4 Hz, 2H)

$^{13}\text{C}$  NMR (151 MHz,  $\text{CDCl}_3$ )  $\delta$  167.36, 143.43, 141.89, 134.18, 131.67, 129.98 (q,  $J$  = 31.71 Hz), 128.64, 126.86, 126.44, 125.52 (q,  $J$  = 3.02 Hz), 123.14 (q,  $J$  = 271.8 Hz), 116.01, 43.44

(ESI) calculated for  $\text{C}_{17}\text{H}_{15}\text{F}_3\text{NO}$   $[\text{M}+\text{H}]^+$  requires 306.1027, found 306.1032

**N-(2-(4-cyanophenyl)allyl)benzamide (6i)**

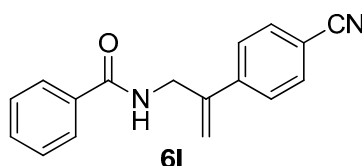

Prepared according to general procedure for amide formation A.

Isolated yield: 80%

$^1\text{H}$  NMR (600 MHz,  $\text{CDCl}_3$ )  $\delta$  7.71 (d,  $J$  = 7.5 Hz, 2H), 7.61 (dd,  $J$  = 28.9, 8.3 Hz, 4H), 7.49 (d,  $J$  = 7.4 Hz, 1H), 7.42 (t,  $J$  = 7.7 Hz, 3H), 6.21 (s, 1H), 5.62 (s, 1H), 5.47 (s, 1H), 4.55 (d,  $J$  = 5.7 Hz, 2H)

$^{13}\text{C}$  NMR (151 MHz,  $\text{CDCl}_3$ )  $\delta$  167.33, 143.25, 142.83, 134.05, 132.39, 131.76, 128.67, 126.83, 126.79, 118.64, 116.98, 111.72, 43.20

(ESI) calculated for  $\text{C}_{17}\text{H}_{15}\text{N}_2\text{O}$   $[\text{M}+\text{H}]^+$  requires 263.1106, found 263.1103

**N-(2-(3-cyanophenyl)allyl)benzamide (6n)**

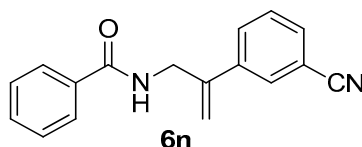

Prepared according to general procedure for amide formation A.

Isolated yield: 70%

$^1\text{H}$  NMR (600 MHz,  $\text{CDCl}_3$ )  $\delta$  7.76 (s, 1H), 7.72 (t,  $J = 7.3$  Hz, 3H), 7.58 (d,  $J = 7.7$  Hz, 1H), 7.50 (t,  $J = 7.4$  Hz, 1H), 7.46 (t,  $J = 7.8$  Hz, 1H), 7.42 (t,  $J = 7.7$  Hz, 2H), 6.28 (s, 1H), 5.55 (s, 1H), 5.43 (s, 1H), 4.53 (d,  $J = 5.8$  Hz, 2H)

$^{13}\text{C}$  NMR (151 MHz,  $\text{CDCl}_3$ )  $\delta$  178.35, 167.34, 142.85, 142.16, 131.74, 131.51, 131.49, 130.44, 129.85, 129.46, 128.68, 126.84, 116.14, 112.88, 43.25

(ESI) calculated for  $\text{C}_{17}\text{H}_{15}\text{N}_2\text{O}$   $[\text{M}+\text{H}]^+$  requires 263.1106, found 263.1111

**N-(2-(4-(morpholinosulfonyl)phenyl)allyl)benzamide (6o)**

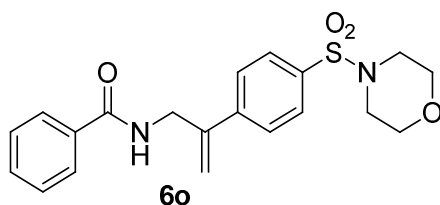

Prepared according to general procedure for amide formation A.

Isolated yield: 51%

$^1\text{H}$  NMR (600 MHz,  $\text{CDCl}_3$ )  $\delta$  7.72 (t,  $J = 6.8$  Hz, 4H), 7.65 (d,  $J = 8.2$  Hz, 2H), 7.51 – 7.48 (m, 1H), 7.42 (t,  $J = 7.6$  Hz, 2H), 5.63 (s, 1H), 5.48 (s, 1H), 4.56 (d,  $J = 5.6$  Hz, 2H), 3.79 – 3.67 (m, 6H), 3.21 (s, 2H)

(ESI) calculated for  $\text{C}_{20}\text{H}_{23}\text{N}_2\text{O}_4\text{S}$   $[\text{M}+\text{H}]^+$  requires 387.1300, found 387.1310

**N-(2-(naphthalen-1-yl)allyl)benzamide (6p)**

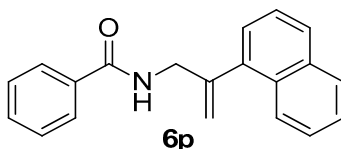

Prepared according to general procedure for amide formation A.

Isolated yield: 55%

$^1\text{H}$  NMR (600 MHz,  $\text{CDCl}_3$ )  $\delta$  8.14 – 8.11 (m, 1H), 7.88 – 7.85 (m, 1H), 7.81 (d,  $J$  = 8.2 Hz, 1H), 7.70 – 7.67 (m, 2H), 7.50 (ddd,  $J$  = 8.0, 3.5, 1.6 Hz, 2H), 7.48 – 7.43 (m, 2H), 7.39 (t,  $J$  = 7.7 Hz, 2H), 7.36 (dd,  $J$  = 6.9, 1.0 Hz, 1H), 6.40 (s, 1H), 5.64 (d,  $J$  = 1.4 Hz, 1H), 5.27 (d,  $J$  = 1.1 Hz, 1H), 4.46 (d,  $J$  = 5.9 Hz, 2H)

$^{13}\text{C}$  NMR (151 MHz,  $\text{CDCl}_3$ )  $\delta$  167.42, 144.59, 138.38, 134.45, 133.69, 131.49, 131.44, 130.57, 128.88, 128.57, 128.36, 127.97, 126.87, 126.34, 125.95, 125.58, 125.41, 125.26, 116.06, 46.01

(ESI) calculated for  $\text{C}_{20}\text{H}_{18}\text{NO}$   $[\text{M}+\text{H}]^+$  requires 288.1310, found 288.1307

#### ***N*-(2-(pyridin-3-yl)allyl)benzamide (6q)**

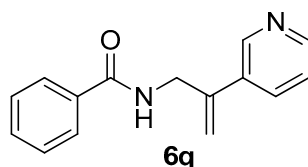

Prepared according to general procedure for amide formation A. During this work up, the organic phase was not washed with 0.1M HCl.

Isolated yield: 60%

$^1\text{H}$  NMR (600 MHz,  $\text{CDCl}_3$ )  $\delta$  8.72 (d,  $J$  = 1.9 Hz, 1H), 8.52 (d,  $J$  = 4.7 Hz, 1H), 7.77 (d,  $J$  = 7.9 Hz, 1H), 7.72 (d,  $J$  = 7.4 Hz, 2H), 7.48 (t,  $J$  = 7.4 Hz, 1H), 7.40 (t,  $J$  = 7.7 Hz, 2H), 7.27 (dd,  $J$  = 8.7, 3.9 Hz, 1H), 6.41 (s, 1H), 5.55 (s, 1H), 5.41 (s, 1H), 4.53 (d,  $J$  = 5.8 Hz, 2H)

$^{13}\text{C}$  NMR (151 MHz,  $\text{CDCl}_3$ )  $\delta$  167.41, 149.15, 147.50, 141.77, 134.16, 134.10, 133.45, 131.65, 128.61, 126.89, 123.34, 115.57, 43.28

(ESI) calculated for  $\text{C}_{15}\text{H}_{15}\text{N}_2\text{O}$   $[\text{M}+\text{H}]^+$  requires 239.1106, found 239.1110

#### ***N*-(2-(quinolin-6-yl)allyl)benzamide (6r)**

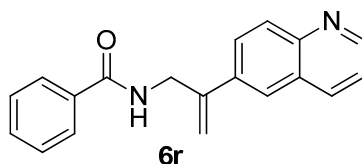

Prepared according to general procedure for amide formation A.

Isolated yield: 88%

$^1\text{H}$  NMR (600 MHz,  $\text{CDCl}_3$ )  $\delta$  8.89 (d,  $J$  = 3.9 Hz, 1H), 8.16 (d,  $J$  = 7.7 Hz, 2H), 8.09 (d,  $J$  = 8.8 Hz, 1H), 7.91 (s, 1H), 7.72 (d,  $J$  = 7.8 Hz, 2H), 7.53 (t,  $J$  = 7.6 Hz, 1H), 7.41 – 7.37 (m, 3H), 6.30 (s, 1H), 5.70 (s, 1H), 5.48 (s, 1H), 4.67 (d,  $J$  = 5.6 Hz, 2H)

$^{13}\text{C}$  NMR (151 MHz,  $\text{CDCl}_3$ )  $\delta$  167.42, 162.35, 150.46, 143.57, 136.56, 136.25, 134.52, 134.30, 131.58, 130.56, 129.58, 128.86, 128.60, 127.96, 126.86, 124.78, 121.52, 115.62, 43.69

(ESI) calculated for  $\text{C}_{19}\text{H}_{17}\text{N}_2\text{O}$   $[\text{M}+\text{H}]^+$  requires 289.1263, found 289.1270

**Synthesis of 4-methoxy-N-(2-(3-(trifluoromethyl)phenyl) allyl) benzamide (6a) – General procedure for amide formation B from aryl carboxylic acids**

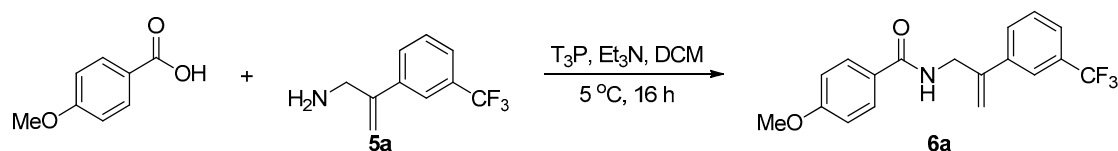

In a 10 mL round-bottom flask equipped with magnetic stir bar, 100 mg 2-(3-(trifluoromethyl) phenyl) prop-2-en-1-amine (**5a**) (0.497 mmol, 1.1 eq), 68.7 mg 4-methoxy benzoic acid (0.4518 mmol, 1 eq) and 470  $\mu\text{L}$  triethylamine (342.9 mg, 3.388 mmol, 7.5 eq) were dissolved in 0.75 mL DCM (0.60M). The mixture was stirred for 15 minutes at  $-15\text{ }^\circ\text{C}$ . Next, 226  $\mu\text{L}$  T<sub>3</sub>P of a 50% wt/wt solution in EtOAc (244 mg, 0.768 mmol, 1.7 eq) were diluted in 0.25 mL DCM (1.81 M) and added to the reaction mixture in 3 portions during 1h. The mixture was stirred at  $4\text{ }^\circ\text{C}$  for 16 h and monitored by HPLC. At completion, the reaction mixture was washed with HCl 0.1 M ( $2 \times 1\text{ mL}$ ), aq  $\text{NaHCO}_3$  5% wt/wt (1 mL)

and brine (1 mL). The organic phase was dried over Na<sub>2</sub>SO<sub>4</sub>. The solvent was removed under reduced pressure to afford a white solid.

Isolated yield: 75%

<sup>1</sup>H NMR (600 MHz, CDCl<sub>3</sub>) δ 7.72 (s, 1H), 7.69 (d, *J* = 8.8 Hz, 2H), 7.65 (d, *J* = 7.9 Hz, 1H), 7.55 (d, *J* = 7.7 Hz, 1H), 7.47 (d, *J* = 7.8 Hz, 1H), 6.90 (d, *J* = 8.8 Hz, 2H), 6.16 (s, 1H), 5.56 (s, 1H), 5.39 (s, 1H), 4.53 (d, *J* = 5.8 Hz, 2H), 3.83 (s, 3H)

<sup>13</sup>C NMR (151 MHz, CDCl<sub>3</sub>) δ 166.89, 162.31, 143.52, 139.30, 130.85 (q, *J* = 31.7 Hz), 129.36, 129.06, 128.68, 126.46, 124.69 (q, *J* = 4.53 Hz), 123.13 (q, *J* = 271.8 Hz), 122.97 (q, *J* = 4.53 Hz), 115.27, 113.80, 55.38, 43.36

(ESI) calculated for C<sub>18</sub>H<sub>17</sub>F<sub>3</sub>NO<sub>2</sub> [M+H]<sup>+</sup> requires 335.1133, found 335.1129

#### **4-methyl-N-(2-(3-(trifluoromethyl)phenyl)allyl)benzamide (6b)**

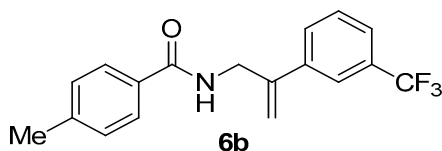

Prepared according to general procedure for amide formation B.

Isolated yield: 82%

<sup>1</sup>H NMR (600 MHz, CDCl<sub>3</sub>) δ 7.73 (s, 1H), 7.65 (d, *J* = 7.8 Hz, 1H), 7.62 (d, *J* = 8.1 Hz, 2H), 7.55 (d, *J* = 7.7 Hz, 1H), 7.47 (t, *J* = 7.8 Hz, 1H), 7.21 (d, *J* = 8.0 Hz, 2H), 6.19 (s, 1H), 5.56 (s, 1H), 5.40 (s, 1H), 4.54 (d, *J* = 5.8 Hz, 2H), 2.38 (s, 3H)

(ESI) calculated for C<sub>18</sub>H<sub>17</sub>F<sub>3</sub>NO [M+H]<sup>+</sup> requires 320.1184, found 320.1193

**4-fluoro-N-(2-(3-(trifluoromethyl)phenyl)allyl)benzamide (6d)**

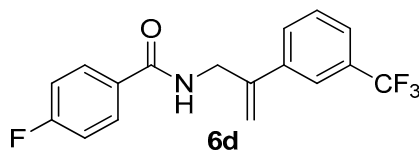

Prepared according to general procedure for amide formation B.

Isolated yield: 80%

$^1\text{H}$  NMR (600 MHz,  $\text{CDCl}_3$ )  $\delta$  7.73 (dd,  $J = 8.6, 5.7$  Hz, 3H), 7.64 (d,  $J = 7.5$  Hz, 1H), 7.56 (d,  $J = 7.5$  Hz, 1H), 7.47 (t,  $J = 7.6$  Hz, 1H), 7.07 (t,  $J = 8.5$  Hz, 2H), 6.26 (s, 1H), 5.56 (s, 1H), 5.39 (s, 1H), 4.53 (d,  $J = 5.5$  Hz, 2H)

$^{13}\text{C}$  NMR (151 MHz,  $\text{CDCl}_3$ )  $\delta$  166.37, 163.95 (d,  $J = 250.66$  Hz), 143.27, 139.16, 130.89 (q,  $J = 31.71$  Hz), 130.37 (d,  $J = 3.02$  Hz), 129.32, 129.19 (d,  $J = 7.55$  Hz), 129.09, 124.77 (q,  $J = 4.53$  Hz), 123.10 (q,  $J = 273.31$  Hz), 122.97 (q,  $J = 4.53$  Hz), 115.57 (d,  $J = 22.65$  Hz), 115.46, 43.47

(ESI) calculated for  $\text{C}_{17}\text{H}_{14}\text{F}_4\text{NO}$   $[\text{M}+\text{H}]^+$  requires 324.0933, found 324.0942

**4-(trifluoromethyl)-N-(2-(3-(trifluoromethyl)phenyl)allyl)benzamide (6f)**

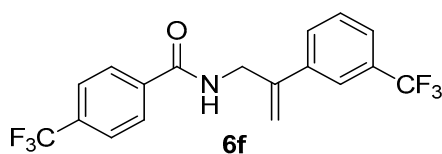

Prepared according to general procedure for amide formation B.

Isolated yield: 92%

$^1\text{H}$  NMR (600 MHz,  $\text{CDCl}_3$ )  $\delta$  7.82 (d,  $J = 8.1$  Hz, 2H), 7.72 (s, 1H), 7.67 (d,  $J = 8.2$  Hz, 2H), 7.65 (d,  $J = 7.6$  Hz, 1H), 7.57 (d,  $J = 7.7$  Hz, 1H), 7.48 (t,  $J = 7.9$  Hz, 1H), 6.34 (s,  $J = 20.3$  Hz, 1H), 5.58 (s, 12H), 5.41 (s, 1H), 4.57 (d,  $J = 5.8$  Hz, 2H)

$^{13}\text{C}$  NMR (151 MHz,  $\text{CDCl}_3$ )  $\delta$  166.15, 143.07, 139.04, 137.49, 133.26 (q,  $J = 31.71$  Hz), 130.95 (q,  $J = 33.22$  Hz), 129.32, 129.13, 127.37, 126.63 (q,  $J = 270.3$  Hz), 125.65

(q,  $J = 4.53$  Hz), 124.84 (q,  $J = 3.02$  Hz), 123.08 (q,  $J = 271.2$  Hz), 122.96 (q,  $J = 4.53$  Hz), 115.70, 43.57

(ESI) calculated for  $C_{18}H_{14}F_6NO$   $[M+H]^+$  requires 374.0901, found 374.0913

#### **4-methyl-N-(2-(quinolin-6-yl)allyl)benzamide (6s)**

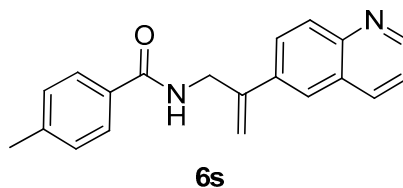

Prepared according to general procedure for amide formation B.

Isolated yield: 90%

$^1H$  NMR (600 MHz, DMSO)  $\delta$  8.93 – 8.87 (m, 2H), 8.41 (d,  $J = 8.2$  Hz, 1H), 8.16 (s, 1H), 8.01 (s, 2H), 7.80 (d,  $J = 8.2$  Hz, 2H), 7.56 (dd,  $J = 8.2, 4.2$  Hz, 1H), 7.24 (d,  $J = 8.0$  Hz, 2H), 5.72 (s, 1H), 5.35 (s, 1H), 4.45 (d,  $J = 5.8$  Hz, 2H), 2.33 (s, 3H)

$^{13}C$  NMR (151 MHz, DMSO)  $\delta$  166.59, 150.63, 144.06, 141.51, 137.34, 137.06, 132.00, 129.24, 128.85, 128.56, 128.31, 127.75, 125.00, 122.27, 114.11, 79.75, 42.62, 21.38

(ESI) calculated for  $C_{18}H_{14}F_6NO$   $[M+H]^+$  requires 302.1419, found 302.1450

#### **N-isobutyl-4-(3-(4-methylbenzamido)prop-1-en-2-yl)benzamide**

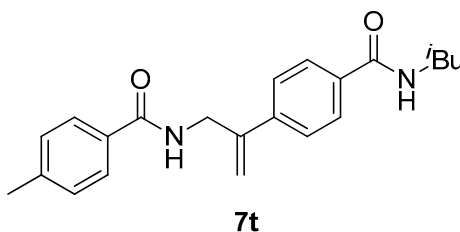

Prepared according to general procedure for amide formation.

Isolated yield: 92%

The product could not be fully purified; The corresponding cyclized derivative however has been purified and the characterization is provided below.

(ESI) calculated for  $C_{22}H_{26}N_2O_2$   $[M+H]^+$  requires 350.1994, found 350.1920

Synthesis of 5-(chloromethyl)-2-(4-nitrophenyl)-5-(3-(trifluoromethyl)phenyl)-4,5-dihydrooxazole ( $7g_{rac}$ )– General procedure for the preparation of racemic oxazolines

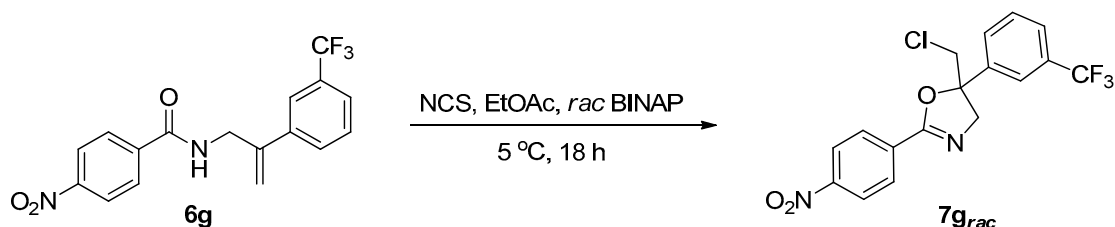

In a flamed-dried 1 mL vial equipped with magnetic stir bar, 17.9 mg 4-nitro-N-(2-(3-(trifluoromethyl)phenyl)allyl)benzamide (0.0511 mmol, 1 eq) were dissolved in 0.179 mL EtOAc (0.29M). Next, 6.3 mg *rac* BINAP (20 mol %) were added under  $N_2$  atmosphere. The mixture was stirred for 15-20 min at 5 °C before 10.9 mg *N*-chlorosuccinimide (0.0817 mmol, 1.6 eq) were added to the vial under  $N_2$  atmosphere. The reaction mixture was stirred for 16 h at 5 °C and monitored by HPLC. At completion, the organic phase was washed with 0.2M NaOH ( $2 \times 0.2$  mL), deionized water (0.2 mL) and brine (0.2 mL). The organic phase was dried over  $Na_2SO_4$  and the solvent was removed under reduced pressure to afford an oil. The product was purified by column chromatography (Hexane/EtOAc: 65/35).

Isolated yield: 84%

$^1H$  NMR (600 MHz,  $CDCl_3$ )  $\delta$  8.33 (d,  $J$  = 8.8 Hz, 2H), 8.23 (d,  $J$  = 8.8 Hz, 2H), 7.68 (s, 1H), 7.65 (d,  $J$  = 7.6 Hz, 1H), 7.62 (d,  $J$  = 7.9 Hz, 1H), 7.57 (t,  $J$  = 7.7 Hz,

1H), 4.61 (d,  $J = 15.4$  Hz, 1H), 4.30 (d,  $J = 15.4$  Hz, 1H), 3.95 (d,  $J = 12.2$  Hz, 1H), 3.88 (d,  $J = 12.2$  Hz, 1H)

$^{13}\text{C}$  NMR (151 MHz,  $\text{CDCl}_3$ )  $\delta$  161.13, 149.78, 142.01, 132.75, 131.35 (q,  $J = 31.71$  Hz), 129.57, 129.34, 128.40, 125.52 (q,  $J = 3.02$  Hz), 123.74, 122.82 (q,  $J = 271.8$  Hz), 121.79 (q,  $J = 3.02$  Hz), 88.08, 65.20, 50.64

(ESI) calculated for  $\text{C}_{17}\text{H}_{13}\text{ClF}_3\text{N}_2\text{O}_3$   $[\text{M}+\text{H}]^+$  requires 385.0489, found 385.0492

**5-(chloromethyl)-2-(4-methoxyphenyl)-5-(3-(trifluoromethyl)phenyl)-4,5-dihydrooxazole ( $7a_{\text{rac}}$ )**

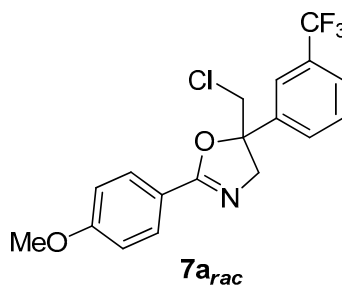

Prepared according to the general procedure for racemic oxazoline formation.

Isolated yield: 91%

(ESI) calculated for  $\text{C}_{18}\text{H}_{16}\text{ClF}_3\text{NO}_2$   $[\text{M}+\text{H}]^+$  requires 370.0743, found 370.0752

The oxazoline product was decomposed when tried to be purified by column chromatography. This phenomenon was observed with *p*-OMe group only, probably because of its electron donating effect, enhancing its N-protonation and subsequent hydrolysis of the oxazoline ring.

**5-(chloromethyl)-2-(p-tolyl)-5-(3-(trifluoromethyl)phenyl)-4,5-dihydrooxazole (7b<sub>rac</sub>)**

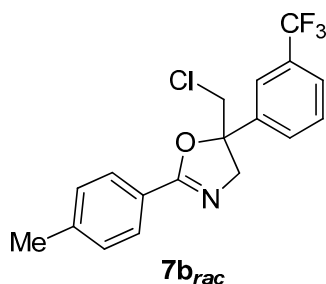

Prepared according to the general procedure for racemic oxazoline formation. The crude residue was treated with chilled diethyl ether which caused BINAP to precipitate as a white solid. The diethyl ether liquors were evaporated and the product was isolated as a yellow oil.

Isolated yield: 93%

<sup>1</sup>H NMR (600 MHz, CDCl<sub>3</sub>) δ 7.98 (d, *J* = 7.9 Hz, 2H), 7.69 (s, 1H), 7.64 – 7.61 (m, 2H), 7.57 – 7.53 (m, 1H), 7.29 (d, *J* = 7.9 Hz, 2H), 4.55 (d, *J* = 14.7 Hz, 1H), 4.25 (d, *J* = 14.6 Hz, 1H), 3.94 (d, *J* = 12.1 Hz, 1H), 3.88 (d, *J* = 12.1 Hz, 1H), 2.43 (s, 3H)

(ESI) calculated for C<sub>18</sub>H<sub>16</sub>ClF<sub>3</sub>NO [M+H]<sup>+</sup> requires 354.0794, found 154.0786

Inseparable from the 6-*endo* isomer (**8b**); 13% present in the <sup>1</sup>H/<sup>13</sup>C NMR spectra.

**5-(chloromethyl)-2-phenyl-5-(3-(trifluoromethyl)phenyl)-4,5-dihydrooxazole (7c<sub>rac</sub>)**

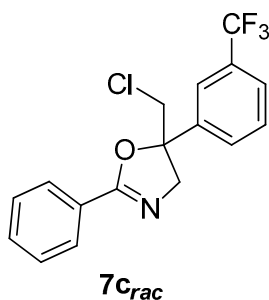

Prepared according to the general procedure for racemic oxazoline formation.  
The product was purified by column chromatography (Hexane/EtOAc: 70/30).

Isolated yield: 76%

$^1\text{H}$  NMR (600 MHz,  $\text{CDCl}_3$ )  $\delta$  8.05 (d,  $J$  = 7.2 Hz, 1H), 7.70 (s, 1H), 7.63 (t,  $J$  = 6.5 Hz, 2H), 7.54 (dd,  $J$  = 13.7, 7.5 Hz, 2H), 7.47 (t,  $J$  = 7.6 Hz, 2H), 4.54 (d,  $J$  = 14.9 Hz, 1H), 4.23 (d,  $J$  = 14.9 Hz, 1H), 3.93 (d,  $J$  = 12.0 Hz, 1H), 3.87 (d,  $J$  = 12.0 Hz, 1H)

$^{13}\text{C}$  NMR (151 MHz,  $\text{CDCl}_3$ )  $\delta$  162.93, 142.55, 131.79, 129.36, 128.57 (q,  $J$  = 33.2 Hz), 128.53, 128.28, 127.06, 126.91, 125.23 (q,  $J$  = 3.02 Hz), 122.92 (q,  $J$  = 271 Hz), 121.94 (q,  $J$  = 3.02 Hz), 87.23, 65.10, 50.60

(ESI) calculated for  $\text{C}_{17}\text{H}_{14}\text{ClF}_3\text{NO}$   $[\text{M}+\text{H}]^+$  requires 340.0638, found 340.0635

Inseparable from the 6-*endo* isomer (**8c**); 3% present in the  $^1\text{H}/^{13}\text{C}$  NMR spectra.

**5-(chloromethyl)-2-(4-fluorophenyl)-5-(3-(trifluoromethyl)phenyl)-4,5-dihydrooxazole (**7d<sub>rac</sub>**)**

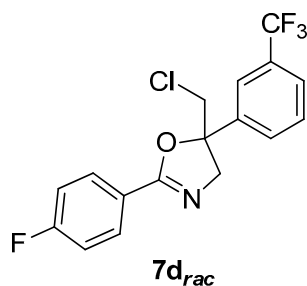

Prepared according to the general procedure for racemic oxazoline formation.  
The product was purified by column chromatography (Hexane/EtOAc: 70/30).

Isolated yield: 90%

$^1\text{H}$  NMR (600 MHz,  $\text{CDCl}_3$ )  $\delta$  8.09 – 8.02 (m, 2H), 7.68 (s, 1H), 7.62 (t,  $J = 8.1$  Hz, 2H), 7.55 (t,  $J = 7.8$  Hz, 1H), 7.17 – 7.13 (m, 2H), 4.53 (d,  $J = 14.9$  Hz, 1H), 4.22 (d,  $J = 14.9$  Hz, 1H), 3.92 (d,  $J = 12.0$  Hz, 1H), 3.87 (d,  $J = 12.0$  Hz, 1H)

$^{13}\text{C}$  NMR (151 MHz,  $\text{CDCl}_3$ )  $\delta$  165.80 (d,  $J = 252.9$  Hz), 162.00, 142.42, 131.18 (q,  $J = 31.71$  Hz), 130.54 (d,  $J = 9.06$  Hz), 129.40, 128.51, 125.28 (q,  $J = 3.02$  Hz), 123.31 (d,  $J = 3.02$  Hz), 122.90 (q,  $J = 271.9$  Hz), 121.89 (q,  $J = 3.02$  Hz), 115.65 (d,  $J = 22.65$  Hz), 87.44, 65.11, 50.60

(ESI) calculated for  $\text{C}_{17}\text{H}_{14}\text{ClF}_4\text{NO}$   $[\text{M}+\text{H}]^+$  requires 358.0544, found 358.0551

Inseparable from the 6-*endo* isomer (**8d**); 10% present in the  $^1\text{H}/^{13}\text{C}$  NMR spectra.

**2-(4-bromophenyl)-5-(chloromethyl)-5-(3-(trifluoromethyl)phenyl)-4,5-dihydrooxazole (**7e<sub>rac</sub>**)**

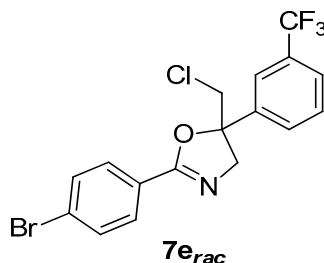

Prepared according to the general procedure for racemic oxazoline formation. The product was purified by column chromatography (Hexane/EtOAc: 80/20).

Isolated yield: 86%

$^1\text{H}$  NMR (600 MHz,  $\text{CDCl}_3$ )  $\delta$  7.94 (d,  $J = 8.3$  Hz, 2H), 7.70 (s, 1H), 7.68 – 7.60 (m, 4H), 7.60 – 7.57 (m, 1H), 4.56 (d,  $J = 15.0$  Hz, 1H), 4.25 (d,  $J = 15.0$  Hz, 1H), 3.95 (d,  $J = 12.0$  Hz, 1H), 3.88 (d,  $J = 12.0$  Hz, 1H)

$^{13}\text{C}$  NMR (151 MHz,  $\text{CDCl}_3$ )  $\delta$  142.31, 132.00, 131.86, 131.22 (q,  $J = 33.22$  Hz), 129.79, 129.43, 128.49, 126.59, 125.94, 125.34 (q,  $J = 4.53$  Hz), 122.88 (q,  $J = 271.8$  Hz), 121.89 (q,  $J = 4.53$  Hz), 87.55, 65.05, 50.58

(ESI) calculated for  $\text{C}_{17}\text{H}_{13}\text{BrClF}_3\text{NO}$   $[\text{M}+\text{H}]^+$  requires 417.9743, found 417.9739

Inseparable from the 6-*endo* isomer (**8e**); 7% present in the  $^1\text{H}/^{13}\text{C}$  NMR spectra.

**5-(chloromethyl)-5-(3-(trifluoromethyl)phenyl)-2-(4(trifluoromethyl)phenyl)-4,5-dihydrooxazole (**7f<sub>rac</sub>**)**

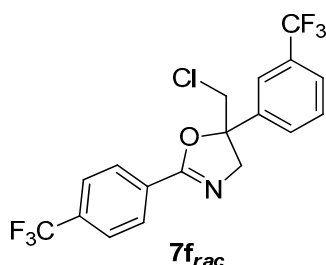

Prepared according to the general procedure for racemic oxazoline formation. The product was purified by column chromatography (Hexane/EtOAc: 70/30).

Isolated yield: 90%

$^1\text{H}$  NMR (600 MHz,  $\text{CDCl}_3$ )  $\delta$  8.17 (d,  $J = 8.0$  Hz, 2H), 7.74 (d,  $J = 8.1$  Hz, 2H), 7.69 (s, 1H), 7.63 (dd,  $J = 13.1, 7.8$  Hz, 2H), 7.56 (t,  $J = 7.7$  Hz, 1H), 4.59 (d,  $J = 15.2$  Hz, 1H), 4.27 (d,  $J = 15.2$  Hz, 1H), 3.94 (d,  $J = 12.1$  Hz, 1H), 3.87 (d, 1H)

$^{13}\text{C}$  NMR (151 MHz,  $\text{CDCl}_3$ )  $\delta$  142.22, 133.31 (q,  $J = 31.71$  Hz), 131.28 (q,  $J = 33.22$  Hz), 130.38, 129.49, 128.67, 128.45, 125.53 (q,  $J = 4.53$  Hz), 125.41 (q,  $J = 3.02$  Hz), 122.85 (q,  $J = 273.31$  Hz), 122.80 (q,  $J = 273.31$  Hz), 121.84 (q,  $J = 3.02$  Hz), 87.73, 65.10, 50.61

(ESI) calculated for  $\text{C}_{18}\text{H}_{13}\text{ClF}_6\text{NO}$   $[\text{M}+\text{H}]^+$  requires 408.0512, found 408.0521

Inseparable from the 6-*endo* isomer (**8f**); 3% present in the  $^1\text{H}/^{13}\text{C}$  NMR spectra.

**5-(chloromethyl)-2,5-diphenyl-4,5-dihydrooxazole (7h<sub>rac</sub>)**

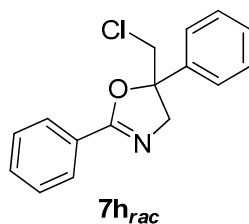

Prepared according to the general procedure for racemic oxazoline formation.

The product was purified by column chromatography (Hexane/EtOAc: 70/30).

Isolated yield: 50%

<sup>1</sup>H NMR (600 MHz, CDCl<sub>3</sub>) δ 8.06 (d, *J* = 7.2 Hz, 2H), 7.52 (t, *J* = 7.4 Hz, 1H), 7.48 – 7.38 (m, 6H), 7.34 (t, *J* = 6.4 Hz, 1H), 4.52 (d, *J* = 14.8 Hz, 1H), 4.25 (d, *J* = 14.8 Hz, 1H), 3.95 (d, *J* = 12.0 Hz, 1H), 3.87 (d, *J* = 12.0 Hz, 1H)

<sup>13</sup>C NMR (151 MHz, CDCl<sub>3</sub>) δ 142.59, 132.38, 128.91, 128.70, 128.64, 128.60, 126.97, 125.08, 124.84, 50.87, 40.31, 29.68

(ESI) calculated for C<sub>16</sub>H<sub>15</sub>ClNO [M+H]<sup>+</sup> requires 272.0764, found 272.0770

Inseparable from the 6-*endo* isomer (**8h**); 7% present in the <sup>1</sup>H/<sup>13</sup>C NMR spectra.

**5-(chloromethyl)-5-(4-fluorophenyl)-2-phenyl-4,5-dihydrooxazole (7i<sub>rac</sub>)**

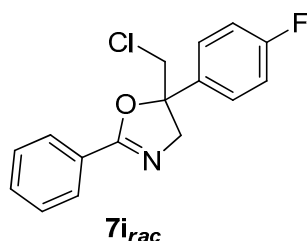

Prepared according to the general procedure for racemic oxazoline formation.

The product was purified by column chromatography (Hexane/EtOAc: 70/30).

Isolated yield: 95%

$^1\text{H}$  NMR (600 MHz,  $\text{CDCl}_3$ )  $\delta$  8.04 (d,  $J$  = 7.4 Hz, 2H), 7.52 (t,  $J$  = 7.4 Hz, 1H), 7.46 (t,  $J$  = 7.5 Hz, 2H), 7.43 – 7.40 (m, 2H), 7.10 (dd,  $J$  = 12.0, 5.2 Hz, 2H), 4.50 (d,  $J$  = 14.8 Hz, 1H), 4.22 (d,  $J$  = 14.8 Hz, 1H), 3.91 (d, 1H), 3.84 (d,  $J$  = 12.0 Hz, 1H)

$^{13}\text{C}$  NMR (151 MHz,  $\text{CDCl}_3$ )  $\delta$  161.69 (d,  $J$  = 243.11 Hz), 137.30 (d,  $J$  = 3.02 Hz), 131.66, 128.72, 128.47, 128.25, 127.24, 126.87 (d,  $J$  = 9.06 Hz), 115.64 (d,  $J$  = 22.65 Hz), 87.26, 65.03, 50.83

(ESI) calculated for  $\text{C}_{16}\text{H}_{14}\text{ClFNO}$   $[\text{M}+\text{H}]^+$  requires 290.0670, found 290.0674

Inseparable from the 6-*endo* isomer (**8i**); 9% present in the  $^1\text{H}/^{13}\text{C}$  NMR spectra.

**4-(5-(chloromethyl)-2-phenyl-4,5-dihydrooxazol-5-yl)-N-isobutylbenzamide**  
**(**7j**)<sub>rac</sub>**

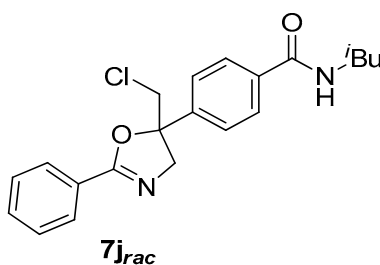

Prepared according to the general procedure for racemic oxazoline formation. The product was purified by column chromatography (Hexane/EtOAc: 70/30).

Isolated yield: 90%

$^1\text{H}$  NMR (600 MHz,  $\text{CDCl}_3$ )  $\delta$  8.06 (d,  $J$  = 7.4 Hz, 2H), 7.80 (d,  $J$  = 8.4 Hz, 2H), 7.54 (t,  $J$  = 7.4 Hz, 1H), 7.50 (d,  $J$  = 8.4 Hz, 2H), 7.47 (t,  $J$  = 7.6 Hz, 2H), 6.18 (s,  $J$  = 20.8 Hz, 1H), 4.52 (d,  $J$  = 14.8 Hz, 1H), 4.23 (d, 1H), 3.93 (d,  $J$  = 12.0 Hz, 1H), 3.87 (d,  $J$  = 12.0 Hz, 1H), 3.29 (t,  $J$  = 6.4 Hz, 2H), 1.90 (dt,  $J$  = 13.4, 6.7 Hz, 1H), 0.98 (d,  $J$  = 6.7 Hz, 6H)

$^{13}\text{C}$  NMR (151 MHz,  $\text{CDCl}_3$ )  $\delta$  166.83, 135.01, 131.90, 128.54, 128.36, 127.37, 126.93, 125.29, 50.59, 47.38, 30.90, 29.68, 28.61, 20.14, 14.09

(ESI) calculated for  $C_{21}H_{24}ClN_2O_2$   $[M+H]^+$  requires 371.1448, found 371.1451

**5-(chloromethyl)-2-phenyl-5-(4-(trifluoromethyl)phenyl)-4,5-dihydro-oxazole (7k<sub>rac</sub>)**

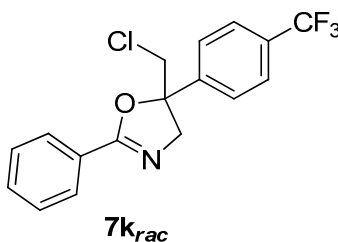

Prepared according to the general procedure for racemic oxazoline formation. The product was purified by column chromatography (Hexane/EtOAc: 70/30).

Isolated yield: 45%

$^1H$  NMR (600 MHz,  $CDCl_3$ )  $\delta$  8.05 (d,  $J$  = 7.4 Hz, 2H), 7.68 (d,  $J$  = 8.0 Hz, 2H), 7.57 (d,  $J$  = 8.1 Hz, 2H), 7.53 (d,  $J$  = 7.4 Hz, 1H), 7.47 (t,  $J$  = 7.5 Hz, 2H), 4.53 (d,  $J$  = 14.6 Hz, 1H), 4.22 (d,  $J$  = 14.6 Hz, 1H), 3.94 (d,  $J$  = 12.0 Hz, 1H), 3.88 (d,  $J$  = 12.0 Hz, 1H)

$^{13}C$  NMR (151 MHz,  $CDCl_3$ )  $\delta$  162.96, 145.36, 131.82, 130.53 (q,  $J$  = 31.71 Hz), 128.53, 128.30, 127.02, 125.78 (q,  $J$  = 3.02 Hz), 125.58, 122.92 (q,  $J$  = 271.8 Hz), 87.33, 65.16, 50.51

(ESI) calculated for  $C_{17}H_{14}ClF_3NO$   $[M+H]^+$  requires 340.0638, found 340.0641

Inseparable from the 6-*endo* isomer (**8k**); 3% present in the  $^1H/^{13}C$  NMR spectra.

**4-(5-(chloromethyl)-2-phenyl-4,5-dihydrooxazol-5-yl)benzonitrile (7l<sub>rac</sub>)**

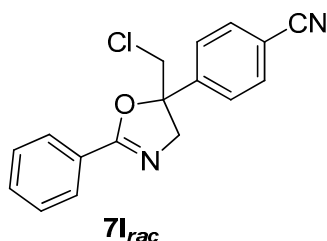

Prepared according to the general procedure for racemic oxazoline formation. The product was purified by column chromatography (Hexane/EtOAc: 50/50).

Isolated yield: 67%

<sup>1</sup>H NMR (600 MHz, CDCl<sub>3</sub>) δ 8.04 (d, *J* = 7.2 Hz, 2H), 7.71 (d, *J* = 8.5 Hz, 2H), 7.57 (d, *J* = 8.5 Hz, 2H), 7.54 (d, *J* = 7.5 Hz, 1H), 7.47 (t, *J* = 7.6 Hz, 2H), 4.51 (d, *J* = 15.0 Hz, 1H), 4.20 (d, *J* = 15.0 Hz, 1H), 3.92 (d, *J* = 12.0 Hz, 1H), 3.87 (d, *J* = 12.0 Hz, 1H)

<sup>13</sup>C NMR (151 MHz, CDCl<sub>3</sub>) δ 162.85, 146.53, 132.60, 131.91, 128.56, 128.27, 126.89, 126.01, 118.24, 112.43, 87.21, 65.20, 50.20

(ESI) calculated for C<sub>17</sub>H<sub>14</sub>ClN<sub>2</sub>O [M+H]<sup>+</sup> requires 297.0716, found 297.0725

Inseparable from the 6-*endo* isomer (**8l**); 3% present in the <sup>1</sup>H/<sup>13</sup>C NMR spectra.

**5-(chloromethyl)-5-(3-methoxyphenyl)-2-phenyl-4,5-dihydrooxazole (7m<sub>rac</sub>)**

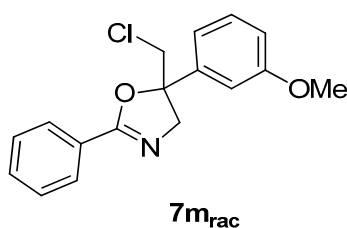

Prepared according to general procedure for racemic oxazoline formation. The product was purified by column chromatography (Hexane/EtOAc: 70/30).

Isolated yield: 90%

$^1\text{H}$  NMR (600 MHz,  $\text{CDCl}_3$ )  $\delta$  8.07 (d,  $J$  = 7.2, 2H), 7.53 (dd,  $J$  = 11.8, 4.3 Hz, 1H), 7.47 (t,  $J$  = 7.6 Hz, 2H), 7.34 (dd,  $J$  = 9.8, 6.2 Hz, 1H), 7.02 – 6.98 (m, 2H), 6.90 – 6.86 (m, 1H), 4.53 (d,  $J$  = 15 Hz, 1H), 4.26 (d,  $J$  = 15 Hz, 1H), 3.95 (d,  $J$  = 12 Hz, 1H), 3.87 (d,  $J$  = 12 Hz, 1H), 3.83 (s, 3H)

$^{13}\text{C}$  NMR (151 MHz,  $\text{CDCl}_3$ )  $\delta$  159.85, 143.06, 131.71, 129.96, 128.69, 128.48, 128.33, 127.15, 126.93, 124.94, 117.15, 113.14, 111.33, 87.72, 64.63, 55.31, 50.98

(ESI) calculated for  $\text{C}_{17}\text{H}_{17}\text{ClNO}_2$   $[\text{M}+\text{H}]^+$  requires 301.0870, found 301.0864

Inseparable from the 6-*endo* isomer (**8m**); 5% present in the  $^1\text{H}/^{13}\text{C}$  NMR spectra.

### 3-(5-(chloromethyl)-2-phenyl-4,5-dihydrooxazol-5-yl)benzonitrile (**7n<sub>rac</sub>**)

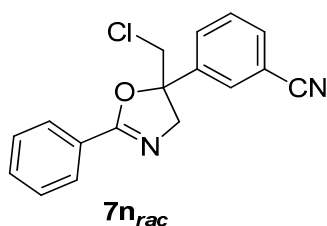

Prepared according to the general procedure for racemic oxazoline formation. The product was purified by column chromatography (Hexane/EtOAc: 60/40).

Isolated yield: 93%

$^1\text{H}$  NMR (600 MHz,  $\text{CDCl}_3$ )  $\delta$  8.04 (d,  $J$  = 7.1 Hz, 2H), 7.78 (s,  $J$  = 1.4 Hz, 1H), 7.67 – 7.64 (m, 2H), 7.56 – 7.52 (m, 2H), 7.48 (t,  $J$  = 7.6 Hz, 2H), 4.51 (d,  $J$  = 15.0 Hz, 1H), 4.20 (d,  $J$  = 15.0 Hz, 1H), 3.93 – 3.89 (m, 1H), 3.86 (d,  $J$  = 12.0 Hz, 1H)

$^{13}\text{C}$  NMR (151 MHz,  $\text{CDCl}_3$ )  $\delta$  143.08, 131.97, 131.93, 129.68, 129.56, 129.02, 128.96, 128.58, 128.29, 128.21, 126.85, 113.11, 86.92, 65.18, 50.30

(ESI) calculated for  $\text{C}_{17}\text{H}_{14}\text{ClN}_2\text{O}$   $[\text{M}+\text{H}]^+$  requires 297.0716, found 297.0722

Inseparable from the 6-*endo* isomer (**8n**); 4% present in the  $^1\text{H}/^{13}\text{C}$  NMR spectra.

**4-((4-(5-(chloromethyl)-2-phenyl-4,5-dihydrooxazol-5-yl)phenyl)sulfonyl)morpholine (7o<sub>rac</sub>)**

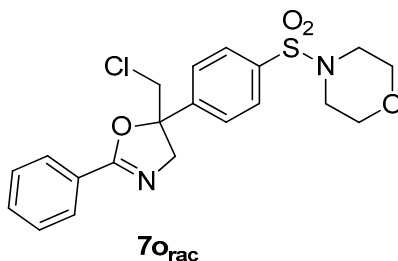

Prepared according to the general procedure for racemic oxazoline formation. The product was purified by column chromatography (Hexane/EtOAc: 50/50).

Isolated yield: 74%

<sup>1</sup>H NMR (600 MHz, CDCl<sub>3</sub>) δ 8.05 (d, *J* = 7.5 Hz, 2H), 7.81 (d, *J* = 8.4 Hz, 2H), 7.64 (d, *J* = 8.4 Hz, 2H), 7.54 (d, *J* = 7.4 Hz, 1H), 7.48 (t, *J* = 7.5 Hz, 2H), 4.55 (d, *J* = 14.9 Hz, 1H), 4.24 (d, *J* = 14.8 Hz, 1H), 3.95 (d, *J* = 12.0 Hz, 1H), 3.89 (d, *J* = 12.0 Hz, 1H), 3.76 – 3.72 (m, 4H), 3.04 – 3.00 (m, 4H)

<sup>13</sup>C NMR (151 MHz, CDCl<sub>3</sub>) δ 131.89, 128.56, 128.33, 128.28, 126.03, 66.06, 50.29, 45.92, 31.91, 29.68, 29.64, 29.34, 22.67, 14.09

(ESI) calculated for C<sub>20</sub>H<sub>22</sub>ClN<sub>2</sub>O<sub>4</sub>S [M+H]<sup>+</sup> requires 421.0911, found 421.0907

**5-(chloromethyl)-5-(naphthalen-1-yl)-2-phenyl-4,5-dihydrooxazole (7p<sub>rac</sub>)**

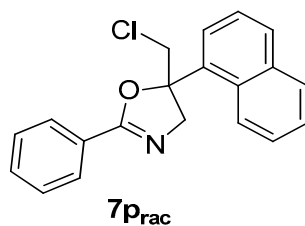

Prepared according to the general procedure for racemic oxazoline formation. The product was purified by column chromatography (Hexane/EtOAc: 70/30).

Isolated yield: 72%

$^1\text{H}$  NMR (600 MHz,  $\text{CD}_3\text{CN}$ )  $\delta$  8.13 – 8.08 (m, 2H), 7.97 (dd,  $J$  = 19.4, 7.6 Hz, 2H), 7.92 (t,  $J$  = 9.0 Hz, 2H), 7.65 – 7.61 (m, 1H), 7.59 (dd,  $J$  = 8.1, 5.0 Hz, 2H), 7.53 (t,  $J$  = 7.6 Hz, 3H), 4.84 (d,  $J$  = 15.2 Hz, 1H), 4.40 (d,  $J$  = 15.1 Hz, 1H), 4.33 (d,  $J$  = 12.5 Hz, 1H), 4.17 (d,  $J$  = 12.5 Hz, 1H)

$^{13}\text{C}$  NMR (151 MHz,  $\text{CD}_3\text{CN}$ )  $\delta$  161.73, 137.05, 134.52, 131.66, 129.53, 129.47, 128.65, 128.03, 127.55, 126.65, 125.83, 125.29, 124.19, 123.97, 88.55, 78.16, 77.95, 77.73, 64.58, 51.49

(ESI) calculated for  $\text{C}_{20}\text{H}_{17}\text{ClNO}$   $[\text{M}+\text{H}]^+$  requires 322.0920, found 322.0917

**5-(chloromethyl)-2-phenyl-5-(pyridin-3-yl)-4,5-dihydrooxazole (7q<sub>rac</sub>)**

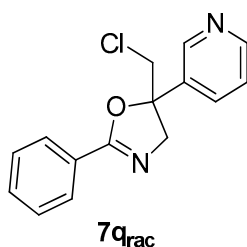

Prepared according to the general procedure for racemic oxazoline formation. The product was purified by column chromatography (Hexane/EtOAc: 70/30).

Isolated yield: 31%

$^1\text{H}$  NMR (600 MHz,  $\text{CDCl}_3$ )  $\delta$  8.73 (d,  $J$  = 1.8 Hz, 1H), 8.64 – 8.59 (m, 1H), 8.04 (d,  $J$  = 7.2 Hz, 2H), 7.81 – 7.74 (m, 1H), 7.53 (t,  $J$  = 7.4 Hz, 1H), 7.46 (t,  $J$  = 7.6 Hz, 2H), 7.35 (dd,  $J$  = 7.9, 4.8 Hz, 1H), 4.53 (d,  $J$  = 15.0 Hz, 1H), 4.24 (d,  $J$  = 15.0 Hz, 1H), 3.94 (d,  $J$  = 11.9 Hz, 1H), 3.88 (d,  $J$  = 11.9 Hz, 1H)

$^{13}\text{C}$  NMR (151 MHz,  $\text{CDCl}_3$ )  $\delta$  162.88, 149.66, 146.77, 133.03, 131.82, 128.52, 128.29, 126.96, 123.43, 86.19, 64.97, 50.38, 29.68

(ESI) calculated for  $\text{C}_{15}\text{H}_{14}\text{ClN}_2\text{O}$   $[\text{M}+\text{H}]^+$  requires 273.0716, found 273.0721

Inseparable from the 6-*endo* isomer (8q); 5% present in the  $^1\text{H}/^{13}\text{C}$  NMR spectra.

**5-(chloromethyl)-2-phenyl-5-(quinolin-6-yl)-4,5-dihydrooxazole (7r<sub>rac</sub>)**

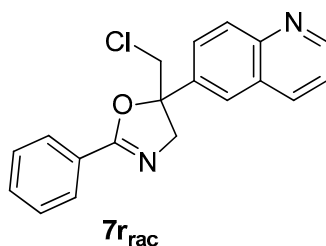

Prepared according to the general procedure for racemic oxazoline formation.  
The product was purified by column chromatography (Hexane/EtOAc: 60/40).

Isolated yield: 58%

$^1\text{H}$  NMR (600 MHz,  $\text{CDCl}_3$ )  $\delta$  8.95 (s, 1H), 8.23 – 8.19 (m, 2H), 8.10 (d,  $J$  = 7.5 Hz, 2H), 7.95 (d,  $J$  = 5.6 Hz, 1H), 7.75 (dd,  $J$  = 8.8, 1.7 Hz, 1H), 7.54 (d,  $J$  = 7.3 Hz, 1H), 7.51 – 7.47 (m, 3H), 4.60 (d,  $J$  = 14.9 Hz, 1H), 4.34 (d, 1H), 4.03 (d,  $J$  = 12.0 Hz, 1H), 3.99 (d,  $J$  = 12.0 Hz, 1H)

$^{13}\text{C}$  NMR (151 MHz,  $\text{CDCl}_3$ )  $\delta$  139.67, 136.68, 131.97, 131.76, 130.13, 128.79, 128.72, 128.62, 128.53, 128.33, 127.22, 126.92, 126.85, 126.55, 124.19, 121.81, 87.58, 50.67, 31.91, 29.34

(ESI) calculated for  $\text{C}_{19}\text{H}_{16}\text{ClN}_2\text{O}$   $[\text{M}+\text{H}]^+$  requires 323.0873, found 323.0868

Inseparable from the 6-*endo* isomer (8r); 10% present in the  $^1\text{H}/^{13}\text{C}$  NMR spectra.

**5-(chloromethyl)-5-(quinolin-6-yl)-2-(p-tolyl)-4,5-dihydrooxazole (7s<sub>rac</sub>)**

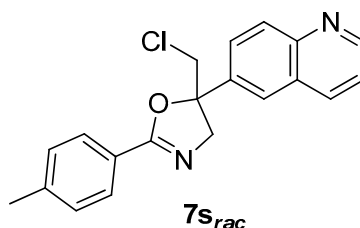

Prepared according to general procedure for racemic oxazoline formation. The product was purified by column chromatography (Hexane/EtOAc: 40/60).

Isolated yield: 90%

$^1\text{H}$  NMR (600 MHz,  $\text{CDCl}_3$ )  $\delta$  8.96 (s, 1H), 8.22 – 8.16 (m, 2H), 8.00 (d,  $J$  = 8.0 Hz, 2H), 7.94 (s, 1H), 7.74 (dd,  $J$  = 8.7, 1.9 Hz, 1H), 7.48-7.45 (m, 1H), 7.30 (d,  $J$  = 7.9 Hz, 2H), 4.59 (d,  $J$  = 14.8 Hz, 1H), 4.33 (d,  $J$  = 14.9 Hz, 1H), 4.04 (d,  $J$  = 12.0 Hz, 1H), 3.99 (d,  $J$  = 12.0 Hz, 1H), 2.45 (s, 3H)

$^{13}\text{C}$  NMR (151 MHz,  $\text{CDCl}_3$ )  $\delta$  142.22, 139.61, 136.37, 130.36, 129.36, 129.24, 129.02, 128.29, 126.93, 126.41, 124.45, 124.18, 121.78, 65.11, 50.69, 29.68, 21.62

(ESI) calculated for  $\text{C}_{20}\text{H}_{17}\text{ClN}_2\text{O}$   $[\text{M}+\text{H}]^+$  requires 336.1029, found 336.1050

Inseparable from the 6-*endo* isomer (**8s**); 5% present in the  $^1\text{H}/^{13}\text{C}$  NMR spectra.

**4-(5-(chloromethyl)-2-(p-tolyl)-4,5-dihydrooxazol-5-yl)-N-isobutyl benzamide (**7t<sub>rac</sub>**)**

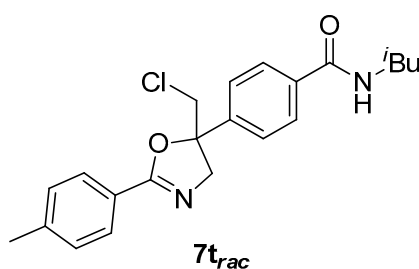

Prepared according to the general procedure for racemic oxazoline formation. The product was purified by column chromatography (Hexane/EtOAc: 40/60).

Isolated yield: 88%

$^1\text{H}$  NMR (600 MHz,  $\text{CDCl}_3$ )  $\delta$  7.95 (d,  $J$  = 7.4 Hz, 2H), 7.81 (d,  $J$  = 8.4 Hz, 2H), 7.51 (d,  $J$  = 8.3 Hz, 2H), 7.28 (d,  $J$  = 7.4 Hz, 2H), 6.15 (s, 1H), 4.51 (d,  $J$  = 14.7 Hz, 1H), 4.21 (d,  $J$  = 15.2 Hz, 1H), 3.94 (d,  $J$  = 12.0 Hz, 1H), 3.88 (d,  $J$  = 11.9 Hz, 1H),

3.31 (t,  $J = 6.4$  Hz, 2H), 2.43 (s, 3H), 1.91 (dt,  $J = 13.5, 6.7$  Hz, 1H), 0.99 (d,  $J = 6.7$  Hz, 9H)

$^{13}\text{C}$  NMR (151 MHz,  $\text{CDCl}_3$ )  $\delta$  166.66, 135.42, 129.90, 129.60, 129.38, 129.04, 127.56, 127.38, 127.05, 126.07, 125.45, 125.18, 125.02, 50.36, 47.41, 29.68, 29.64, 29.34, 28.61, 21.79, 20.15

(ESI) calculated for  $\text{C}_{22}\text{H}_{25}\text{ClN}_2\text{O}_2$   $[\text{M}+\text{H}]^+$  requires 384.1605, found 384.1642

Synthesis of 5-(chloromethyl)-2-(4-nitrophenyl)-5-(3-(trifluoromethyl)phenyl)-4,5-dihydrooxazole (7g) – General procedure for the asymmetric halocyclisation

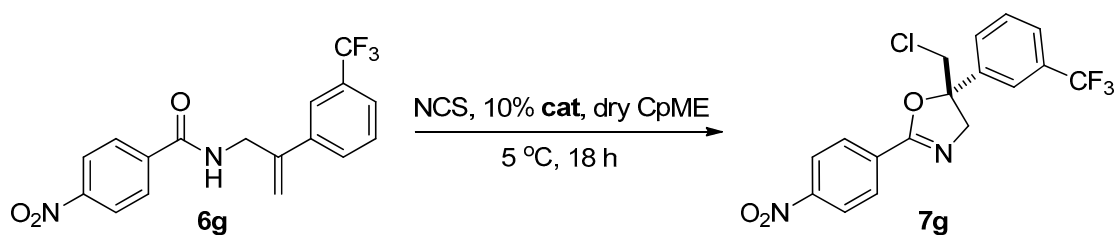

In a flamed-dried 1 mL vial equipped with magnetic stir bar 57.3 mg 4-nitro-N-(2-(3-(trifluoromethyl)phenyl)allyl)benzamide (**6g**) (0.1635 mmol, 1 eq) were dissolved in 0.57 mL dry CpME (0.29M). 19.2 mg (*S*)-DTBM-SEGPHOS (10 mol%) were added under  $\text{N}_2$  atmosphere. The mixture was stirred for 15-20 min at 5 °C before 28.4 mg N-Chlorosuccinimide (0.2125 mmol, 1.3 eq) was added to the vial under  $\text{N}_2$  atmosphere. The reaction mixture was stirred for 16 h at 5 °C and monitored by HPLC. At completion, the organic phase was washed with NaOH 0.2 M ( $2 \times 0.5$  mL), deionized water (0.5 mL) and brine (0.5 mL). The organic phase was dried over  $\text{Na}_2\text{SO}_4$  and the solvent was removed under reduced pressure to afford an oil.

**5-(chloromethyl)-2-(4-methoxyphenyl)-5-(3-(trifluoromethyl)phenyl)-4,5-dihydrooxazole (7a)**

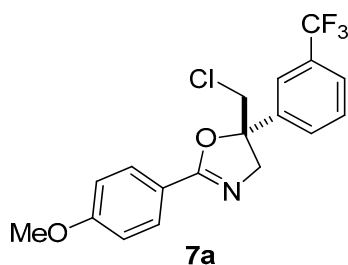

Prepared according to the general procedure for asymmetric halocyclisation.

**5-(chloromethyl)-2-(p-tolyl)-5-(3-(trifluoromethyl)phenyl)-4,5-dihydrooxazole (7b)**

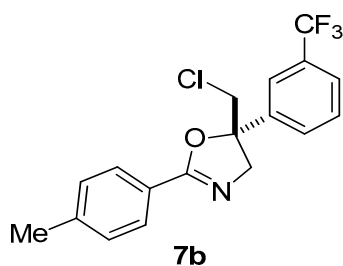

Prepared according to the general procedure for asymmetric halocyclisation.

**5-(chloromethyl)-2-phenyl-5-(3-(trifluoromethyl)phenyl)-4,5-dihydrooxazole (7c)**

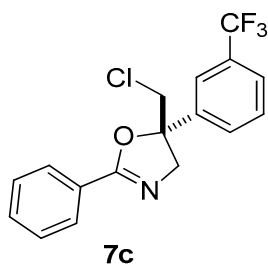

Prepared according to the general procedure for asymmetric halocyclisation.

**5-(chloromethyl)-2-(4-fluorophenyl)-5-(3-(trifluoromethyl)phenyl)-4,5-dihydrooxazole (7d)**

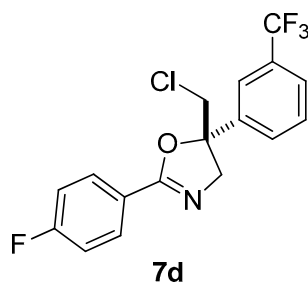

Prepared according to the general procedure for asymmetric halocyclisation.

**2-(4-bromophenyl)-5-(chloromethyl)-5-(3-(trifluoromethyl)phenyl)-4,5-dihydrooxazole (7e)**

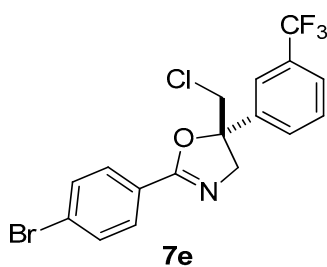

Prepared according to the general procedure for asymmetric halocyclisation.

**(R)-5-(chloromethyl)-5-(3-(trifluoromethyl)phenyl)-2-(4-(trifluoromethyl)phenyl)-4,5-dihydrooxazole (7f)**

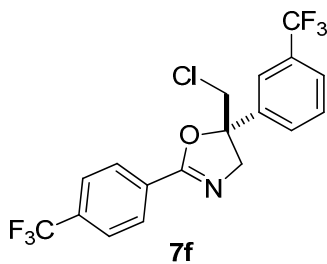

Prepared according to the general procedure for asymmetric halocyclisation.

**5-(chloromethyl)-2,5-diphenyl-4,5-dihydrooxazole (7h)**

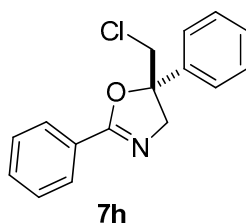

Prepared according to the general procedure for asymmetric halocyclisation.

**5-(chloromethyl)-5-(4-fluorophenyl)-2-phenyl-4,5-dihydrooxazole (7i)**

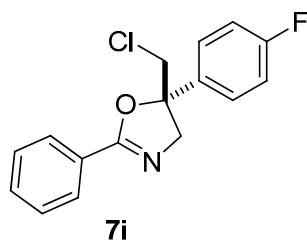

Prepared according to the general procedure for asymmetric halocyclisation.

**4-(5-(chloromethyl)-2-phenyl-4,5-dihydrooxazol-5-yl)-N-isobutylbenzamide (7j)**

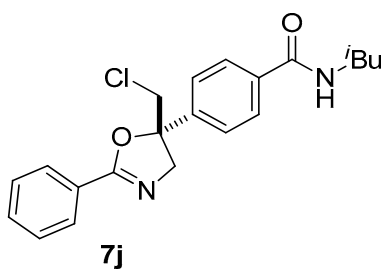

Prepared according to the general procedure for asymmetric halocyclisation.

**5-(chloromethyl)-2-phenyl-5-(4-(trifluoromethyl)phenyl)-4,5-dihydrooxazole (7k)**

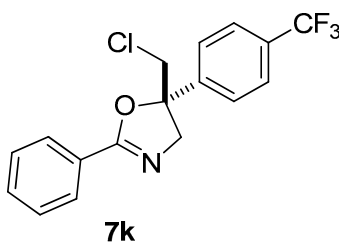

Prepared according to the general procedure for asymmetric halocyclisation.

**4-(5-(chloromethyl)-2-phenyl-4,5-dihydrooxazol-5-yl)benzonitrile (7l)**

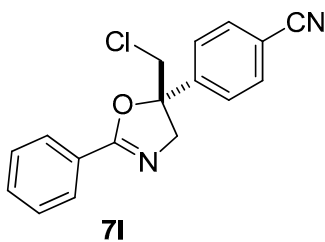

Prepared according to the general procedure for asymmetric halocyclisation.

**5-(chloromethyl)-5-(3-methoxyphenyl)-2-phenyl-4,5-dihydrooxazole (7m)**

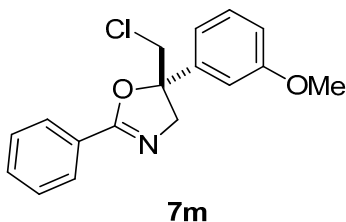

Prepared according to the general procedure for asymmetric halocyclisation.

**3-(5-(chloromethyl)-2-phenyl-4,5-dihydrooxazol-5-yl)benzonitrile (7n)**

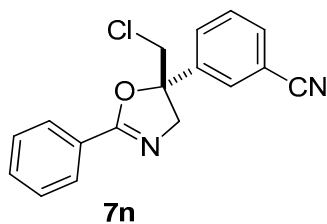

Prepared according to the general procedure for asymmetric halocyclisation.

**4-((4-(5-(chloromethyl)-2-phenyl-4,5-dihydrooxazol-5-yl)phenyl)sulfonyl)morpholine (7o)**

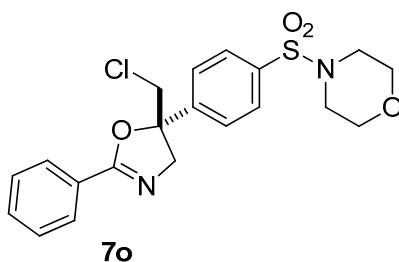

Prepared according to the general procedure for asymmetric halocyclisation.

**5-(chloromethyl)-2-phenyl-5-(pyridin-3-yl)-4,5-dihydrooxazole (7q)**

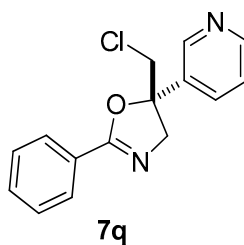

Prepared according to the general procedure for asymmetric halocyclisation.

**5-(chloromethyl)-5-(naphthalen-1-yl)-2-phenyl-4,5-dihydrooxazole (7p)**

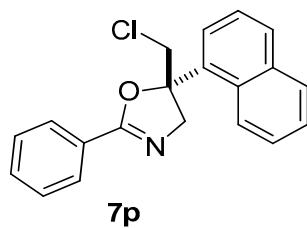

Prepared according to the general procedure for asymmetric halocyclisation.

**5-(chloromethyl)-2-phenyl-5-(quinolin-6-yl)-4,5-dihydrooxazole (7r)**

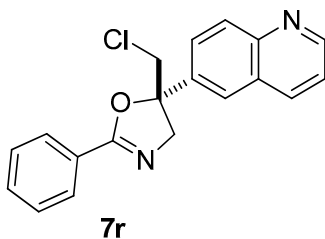

Prepared according to the general procedure for asymmetric halocyclisation.

**5-(chloromethyl)-5-(quinolin-6-yl)-2-(p-tolyl)-4,5-dihydrooxazole (7s)**

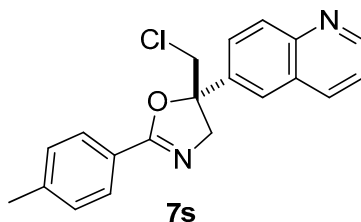

Prepared according to the general procedure for asymmetric halocyclisation.

**4-(5-(chloromethyl)-2-(p-tolyl)-4,5-dihydrooxazol-5-yl)-N-isobutyl benzamide (7t)**

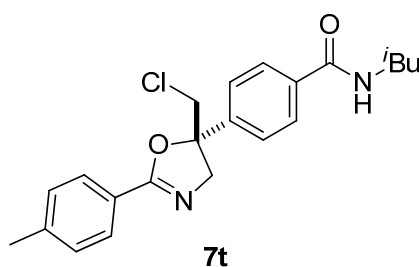

Prepared according to the general procedure for asymmetric halocyclisation.

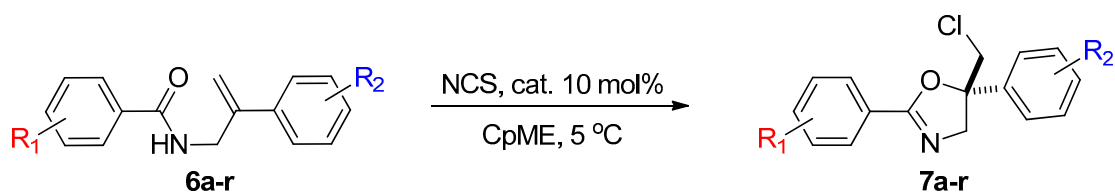

**Table S1** Chiral HPLC methods for racemic oxazolines.

| Product   | R <sub>1</sub>                     | R <sub>2</sub>                                  | Column type      | HPLC settings                 | Retention Times |
|-----------|------------------------------------|-------------------------------------------------|------------------|-------------------------------|-----------------|
| <b>7a</b> | 4-OMeC <sub>6</sub> H <sub>4</sub> | 3-CF <sub>3</sub> C <sub>6</sub> H <sub>4</sub> | PHENOMENEX       | Hexane/IPA: 97/3,             | 17.564 min      |
|           |                                    |                                                 | Lux® Cellulose-1 | 0.9 mL/min, 25 °C, 254 nm     | 19.906 min      |
| <b>7b</b> | 4-Me-C <sub>6</sub> H <sub>4</sub> | 3-CF <sub>3</sub> C <sub>6</sub> H <sub>4</sub> | PHENOMENEX       | MeCN/H <sub>2</sub> O: 60/40, | 8.367 min       |
|           |                                    |                                                 | Lux® Cellulose-3 | 0.8 mL/min, 25 °C, 254 nm     | 10.956 min      |
| <b>7c</b> | C <sub>6</sub> H <sub>5</sub>      | 3-CF <sub>3</sub> C <sub>6</sub> H <sub>4</sub> | PHENOMENEX       | Hexane/IPA: 97/3,             | 9.817 min       |
|           |                                    |                                                 | Lux® Cellulose-1 | 0.9 mL/min, 25 °C, 254 nm     | 10.965 min      |
| <b>7d</b> | 4-FC <sub>6</sub> H <sub>4</sub>   | 3-CF <sub>3</sub> C <sub>6</sub> H <sub>4</sub> | PHENOMENEX       | MeCN/H <sub>2</sub> O: 60/40, | 7.858 min       |
|           |                                    |                                                 | Lux® Cellulose-3 | 0.8 mL/min, 25 °C, 254 nm     | 9.449 min       |
| <b>7e</b> | 4-BrC <sub>6</sub> H <sub>4</sub>  | 3-CF <sub>3</sub> C <sub>6</sub> H <sub>4</sub> | PHENOMENEX       | MeCN/H <sub>2</sub> O: 60/40, | 11.300 min      |
|           |                                    |                                                 | Lux® Cellulose-3 | 0.8 mL/min, 25 °C, 254 nm     | 12.794 min      |

|    |                                                 |                                                                      |                                     |                              |                          |
|----|-------------------------------------------------|----------------------------------------------------------------------|-------------------------------------|------------------------------|--------------------------|
| 7f | 4-CF <sub>3</sub> C <sub>6</sub> H <sub>4</sub> | 3-CF <sub>3</sub> C <sub>6</sub> H <sub>4</sub>                      | PHENOMENEX                          | Hexane/IPA: 92/8,            | 13.117 min<br>14.031 min |
|    |                                                 |                                                                      | Lux® i-Amylose-1<br>250x4.6 mm, 5µm | 0.6 mL/min, 25 °C,<br>254 nm |                          |
| 7g | 4-NO <sub>2</sub> C <sub>6</sub> H <sub>4</sub> | 3-CF <sub>3</sub> C <sub>6</sub> H <sub>4</sub>                      | PHENOMENEX                          | Hexane/IPA: 97/3,            | 27.172 min<br>39.547 min |
|    |                                                 |                                                                      | Lux® Cellulose-1<br>250x4.6 mm, 5µm | 0.9 mL/min, 25 °C,<br>254 nm |                          |
| 7h | C <sub>6</sub> H <sub>5</sub>                   | C <sub>6</sub> H <sub>5</sub>                                        | PHENOMENEX                          | Hexane/IPA: 93/7,            | 10.767 min<br>14.331 min |
|    |                                                 |                                                                      | Lux® i-Amylose-1<br>250x4.6 mm, 5µm | 1.0 mL/min, 25 °C,<br>254 nm |                          |
| 7i | C <sub>6</sub> H <sub>5</sub>                   | 4-FC <sub>6</sub> H <sub>4</sub>                                     | PHENOMENEX                          | Hexane/IPA:80/20,            | 7.619 min<br>8.625 min   |
|    |                                                 |                                                                      | Lux® i-Amylose-1<br>250x4.6 mm, 5µm | 0.8 mL/min, 25 °C,<br>254 nm |                          |
| 7j | C <sub>6</sub> H <sub>5</sub>                   | 4-CONH-<br><sup>i</sup> BuC <sub>6</sub> H <sub>4</sub>              | PHENOMENEX                          | Hexane/IPA:80/20,            | 21.608 min<br>26.333 min |
|    |                                                 |                                                                      | Lux® i-Amylose-1<br>250x4.6 mm, 5µm | 0.8 mL/min, 25 °C,<br>254 nm |                          |
| 7k | C <sub>6</sub> H <sub>5</sub>                   | 4-CF <sub>3</sub> C <sub>6</sub> H <sub>4</sub>                      | PHENOMENEX                          | Hexane/IPA: 95/5,            | 8.366 min<br>10.229 min  |
|    |                                                 |                                                                      | Lux® Cellulose-1<br>250x4.6 mm, 5µm | 1.0 mL/min, 25 °C,<br>254 nm |                          |
| 7l | C <sub>6</sub> H <sub>5</sub>                   | 4-NCC <sub>6</sub> H <sub>4</sub>                                    | PHENOMENEX                          | Hexane/IPA: 92/8,            | 19.966 min<br>24.267 min |
|    |                                                 |                                                                      | Lux® Cellulose-1<br>250x4.6 mm, 5µm | 1.0 mL/min, 25 °C,<br>254 nm |                          |
| 7m | C <sub>6</sub> H <sub>5</sub>                   | 3-OMeC <sub>6</sub> H <sub>4</sub>                                   | PHENOMENEX                          | Hexane/IPA:90/10,            | 10.789 min<br>11.356 min |
|    |                                                 |                                                                      | Lux® Cellulose-1<br>250x4.6 mm, 5µm | 0.9 mL/min, 25 °C,<br>254 nm |                          |
| 7n | C <sub>6</sub> H <sub>5</sub>                   | 3-NCC <sub>6</sub> H <sub>4</sub>                                    | PHENOMENEX                          | Hexane/IPA: 95/5,            | 24,407 min<br>33.363 min |
|    |                                                 |                                                                      | Lux® Cellulose-1<br>250x4.6 mm, 5µm | 1.0 mL/min, 25 °C,<br>254 nm |                          |
| 7o | C <sub>6</sub> H <sub>5</sub>                   | 4-(SO <sub>2</sub> -<br>morpholine)<br>C <sub>6</sub> H <sub>4</sub> | PHENOMENEX                          | Hexane/IPA:80/20,            | 36.560 min<br>45.888 min |
|    |                                                 |                                                                      | Lux® i-Amylose-1<br>250x4.6 mm, 5µm | 0.7 mL/min, 25 °C,<br>254 nm |                          |
| 7p | C <sub>6</sub> H <sub>5</sub>                   | 1-naphthyl                                                           | PHENOMENEX                          | Hexane/IPA: 95/5,            | 11.647 min<br>12.936 min |
|    |                                                 |                                                                      | Lux® Cellulose-1<br>250x4.6 mm, 5µm | 1.0 mL/min, 25 °C,<br>254 nm |                          |

---

|           |                                    |                                                         |                                     |                               |                          |
|-----------|------------------------------------|---------------------------------------------------------|-------------------------------------|-------------------------------|--------------------------|
| <b>7q</b> | C <sub>6</sub> H <sub>5</sub>      | 3-C <sub>5</sub> H <sub>5</sub> N                       | PHENOMENEX                          | Hexane/IPA:80/20,             | 14.234 min<br>21.243 min |
|           |                                    |                                                         | Lux® i-Amylose-1<br>250x4.6 mm, 5µm | 0.7 mL/min, 25 °C,<br>254 nm  |                          |
| <b>7r</b> | C <sub>6</sub> H <sub>5</sub>      | 6-quinoline                                             | PHENOMENEX                          | Hexane/IPA:80/20,             | 26.782 min<br>28.188 min |
|           |                                    |                                                         | Lux® i-Amylose-1<br>250x4.6 mm, 5µm | 0.5 mL/min, 25 °C,<br>254 nm  |                          |
| <b>7s</b> | 4-Me-C <sub>6</sub> H <sub>4</sub> | 6-quinoline                                             | PHENOMENEX                          | MeCN/H <sub>2</sub> O: 60/40, | 6.932 min<br>9.696 min   |
|           |                                    |                                                         | Lux® Cellulose-3<br>250x4.6 mm, 5µm | 0.8 mL/min, 25 °C,<br>254 nm  |                          |
| <b>7t</b> | 4-Me-C <sub>6</sub> H <sub>4</sub> | 4-CONH-<br><sup>t</sup> BuC <sub>6</sub> H <sub>4</sub> | PHENOMENEX                          | MeCN/H <sub>2</sub> O: 60/40, | 6.387 min<br>3.774 min   |
|           |                                    |                                                         | Lux® Cellulose-3<br>250x4.6 mm, 5µm | 0.8 mL/min, 25 °C,<br>254 nm  |                          |

---

## HPLC

### Racemic product

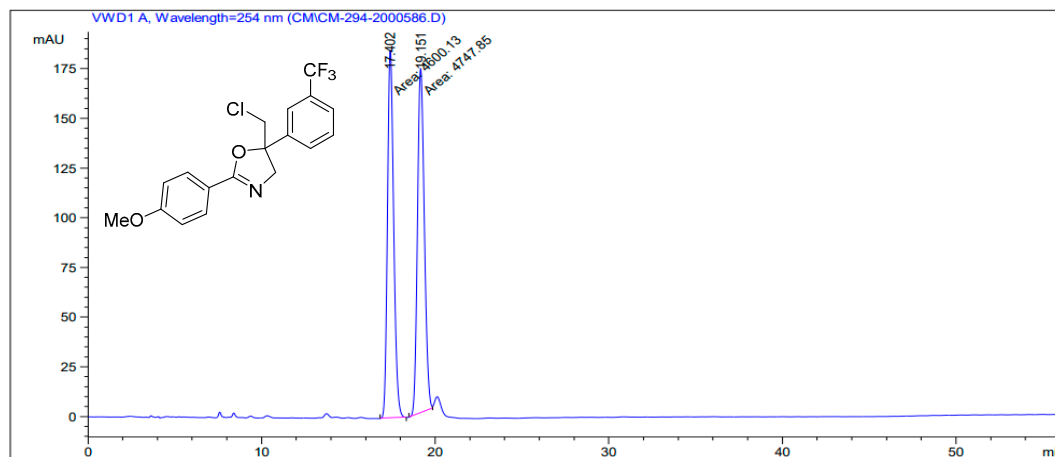

Signal 1: VWD1 A, Wavelength=254 nm

| Peak # | RetTime [min] | Type | Width [min] | Area mAU   | Height [mAU] | Area %  |
|--------|---------------|------|-------------|------------|--------------|---------|
| 1      | 17.402        | MM   | 0.4146      | 4600.13232 | 184.92120    | 49.2099 |
| 2      | 19.151        | MM   | 0.4570      | 4747.84961 | 173.15601    | 50.7901 |

### Product from enantioselective reaction

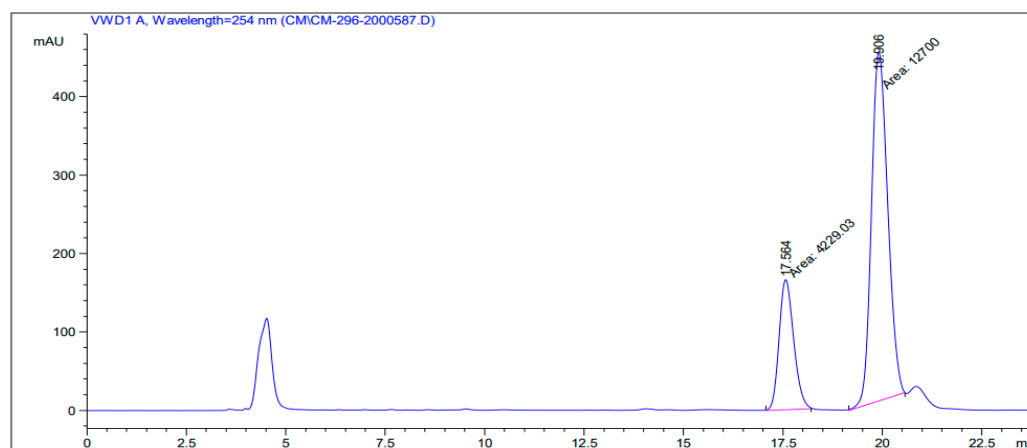

Signal 1: VWD1 A, Wavelength=254 nm

| Peak # | RetTime [min] | Type | Width [min] | Area mAU   | Height [mAU] | Area %  |
|--------|---------------|------|-------------|------------|--------------|---------|
| 1      | 17.564        | MM   | 0.4247      | 4229.03320 | 165.95943    | 24.9810 |
| 2      | 19.906        | MM   | 0.4751      | 1.27000e4  | 445.50519    | 75.0190 |

### Racemic product

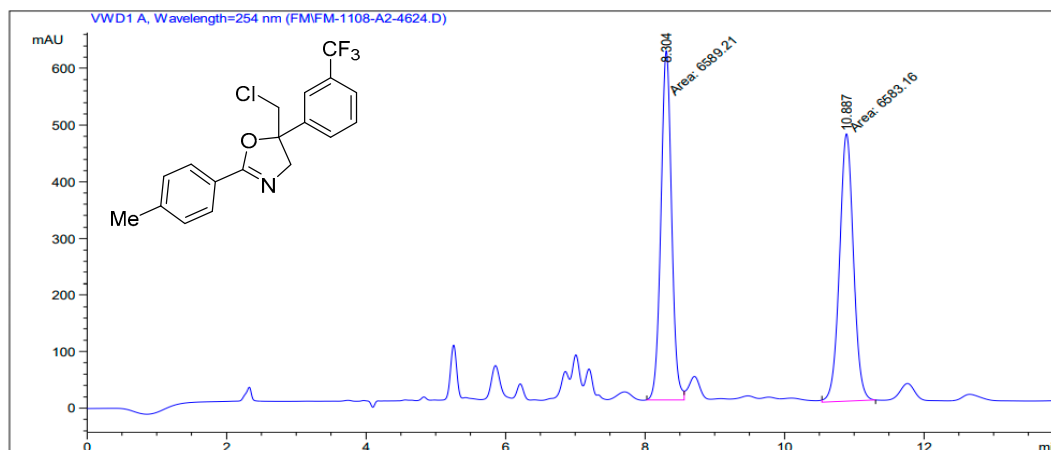

Signal 1: VWD1 A, Wavelength=254 nm

| Peak # | RetTime [min] | Type | Width [min] | Area mAU   | Height [mAU] | Area %  |
|--------|---------------|------|-------------|------------|--------------|---------|
| 1      | 8.304         | MM   | 0.1778      | 6589.20605 | 617.57483    | 50.0230 |
| 2      | 10.887        | MM   | 0.2324      | 6583.15869 | 472.19656    | 49.9770 |

### Product from enantioselective reaction

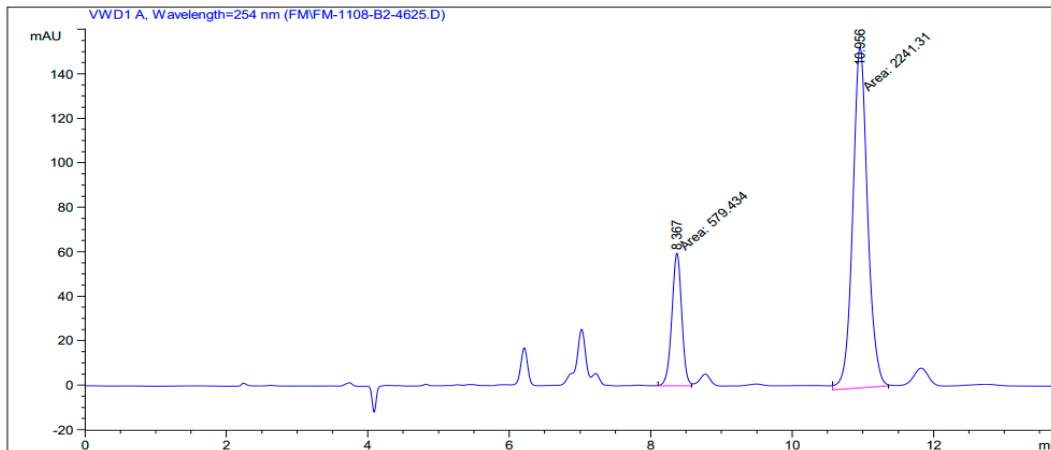

Signal 1: VWD1 A, Wavelength=254 nm

| Peak # | RetTime [min] | Type | Width [min] | Area mAU   | Height [mAU] | Area %  |
|--------|---------------|------|-------------|------------|--------------|---------|
| 1      | 8.367         | MM   | 0.1618      | 579.43427  | 59.67440     | 20.5419 |
| 2      | 10.956        | MM   | 0.2433      | 2241.30933 | 153.52629    | 79.4581 |

### Racemic product

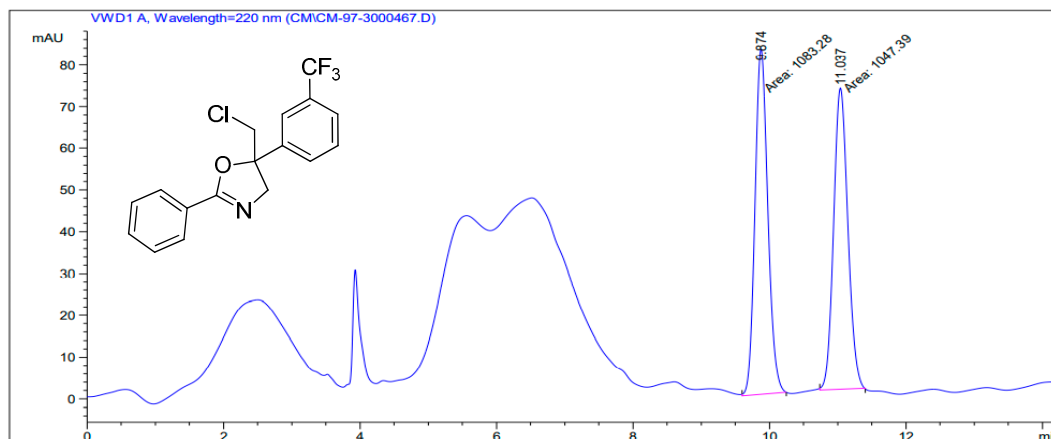

Signal 1: VWD1 A, Wavelength=220 nm

| Peak # | RetTime [min] | Type | Width [min] | Area mAU*s | Height [mAU] | Area %  |
|--------|---------------|------|-------------|------------|--------------|---------|
| 1      | 9.874         | MM   | 0.2181      | 1083.27563 | 82.76808     | 50.8420 |
| 2      | 11.037        | MM   | 0.2417      | 1047.39490 | 72.22694     | 49.1580 |

### Product from enantioselective reaction

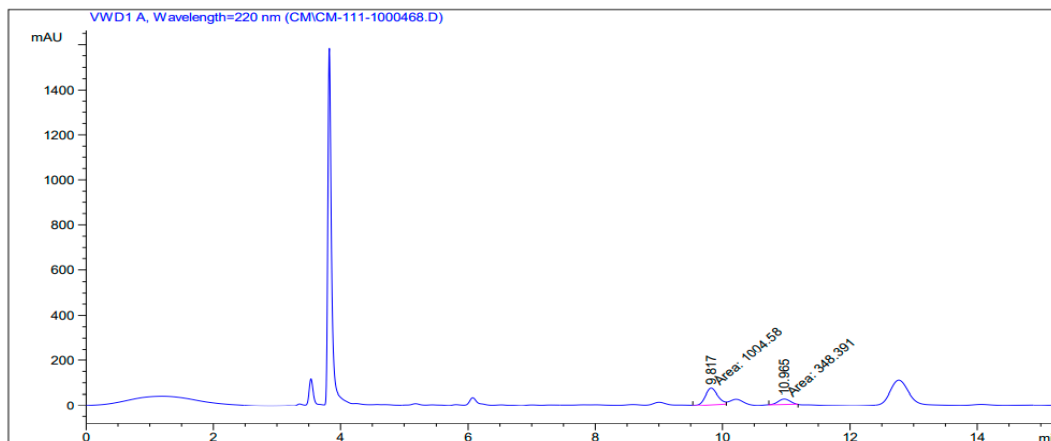

Signal 1: VWD1 A, Wavelength=220 nm

| Peak # | RetTime [min] | Type | Width [min] | Area mAU*s | Height [mAU] | Area %  |
|--------|---------------|------|-------------|------------|--------------|---------|
| 1      | 9.817         | MM   | 0.2298      | 1004.58484 | 72.84771     | 74.2500 |
| 2      | 10.965        | MM   | 0.2278      | 348.39081  | 25.48541     | 25.7500 |

### Racemic product

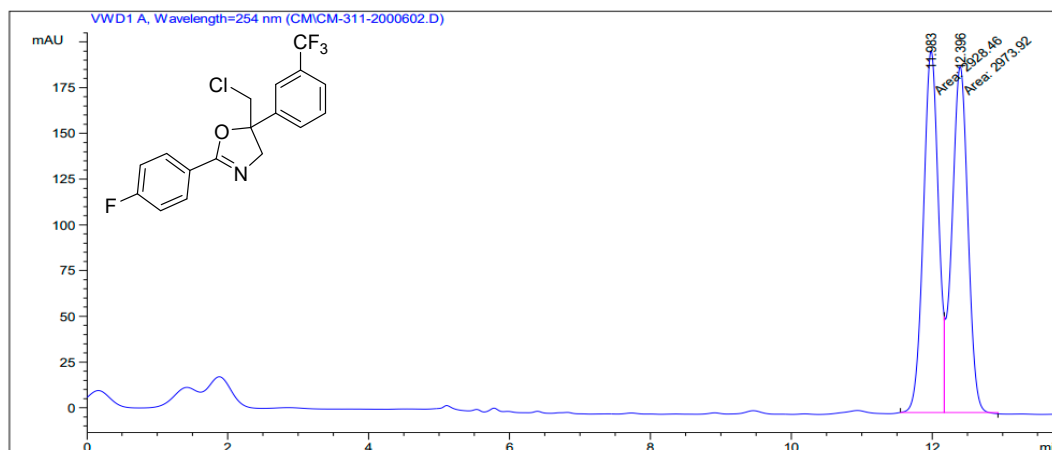

Signal 1: VWD1 A, Wavelength=254 nm

| Peak # | RetTime [min] | Type | Width [min] | Area mAU*s | Height [mAU] | Area %  |
|--------|---------------|------|-------------|------------|--------------|---------|
| 1      | 11.983        | MF   | 0.2467      | 2928.46094 | 197.84641    | 49.6149 |
| 2      | 12.396        | FM   | 0.2619      | 2973.92017 | 189.27411    | 50.3851 |

### Product from enantioselective reaction

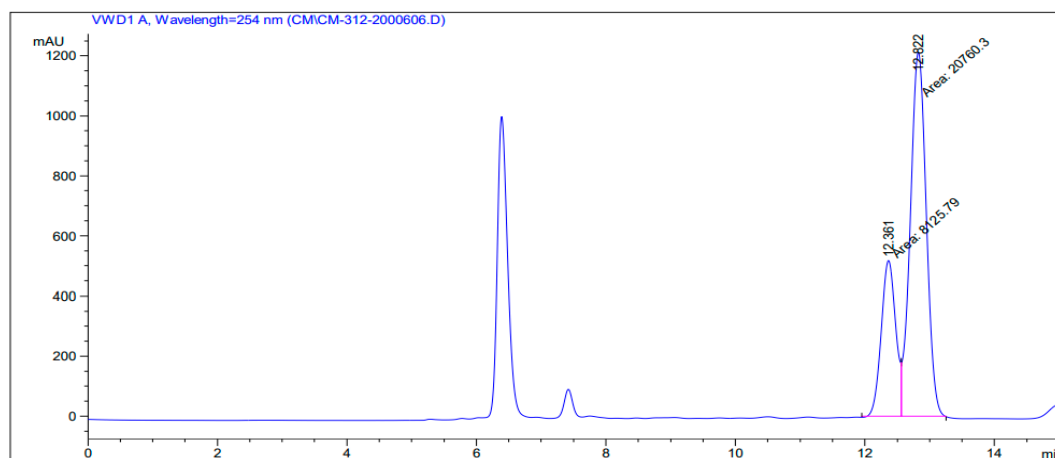

Signal 1: VWD1 A, Wavelength=254 nm

| Peak # | RetTime [min] | Type | Width [min] | Area mAU*s | Height [mAU] | Area %  |
|--------|---------------|------|-------------|------------|--------------|---------|
| 1      | 12.361        | MF   | 0.2614      | 8125.78711 | 518.11908    | 28.1304 |
| 2      | 12.822        | FM   | 0.2852      | 2.07603e4  | 1213.21680   | 71.8696 |

### Racemic product

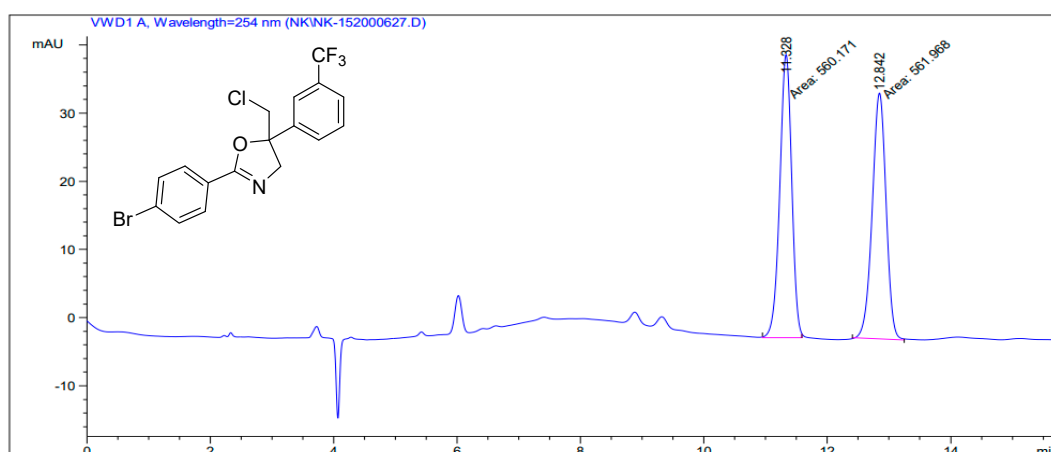

Signal 1: VWD1 A, Wavelength=254 nm

| Peak # | RetTime [min] | Type | Width [min] | Area mAU *s | Height [mAU] | Area %  |
|--------|---------------|------|-------------|-------------|--------------|---------|
| 1      | 11.328        | MM   | 0.2245      | 560.17059   | 41.58200     | 49.9199 |
| 2      | 12.842        | MM   | 0.2596      | 561.96759   | 36.07897     | 50.0801 |

### Product from enantioselective reaction

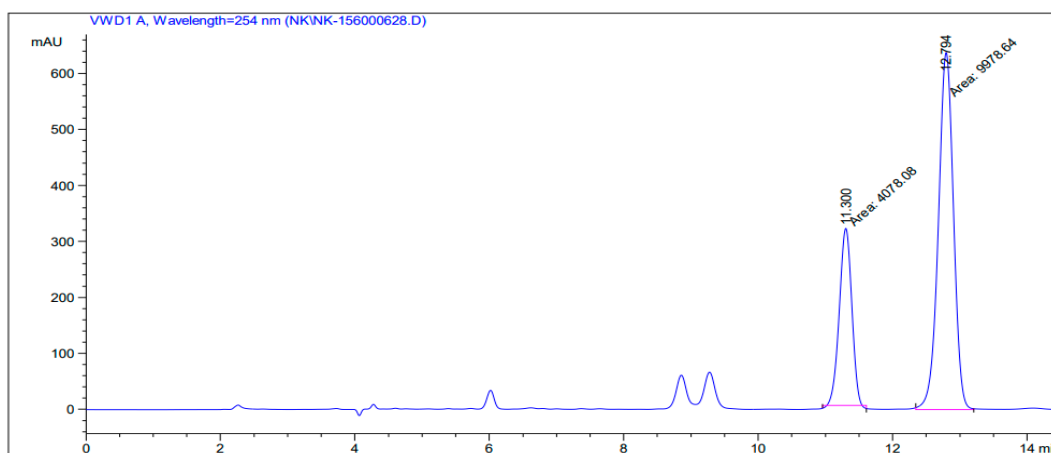

Signal 1: VWD1 A, Wavelength=254 nm

| Peak # | RetTime [min] | Type | Width [min] | Area mAU *s | Height [mAU] | Area %  |
|--------|---------------|------|-------------|-------------|--------------|---------|
| 1      | 11.300        | MM   | 0.2146      | 4078.07690  | 316.65405    | 29.0116 |
| 2      | 12.794        | MM   | 0.2607      | 9978.64258  | 637.86646    | 70.9884 |

### Racemic product

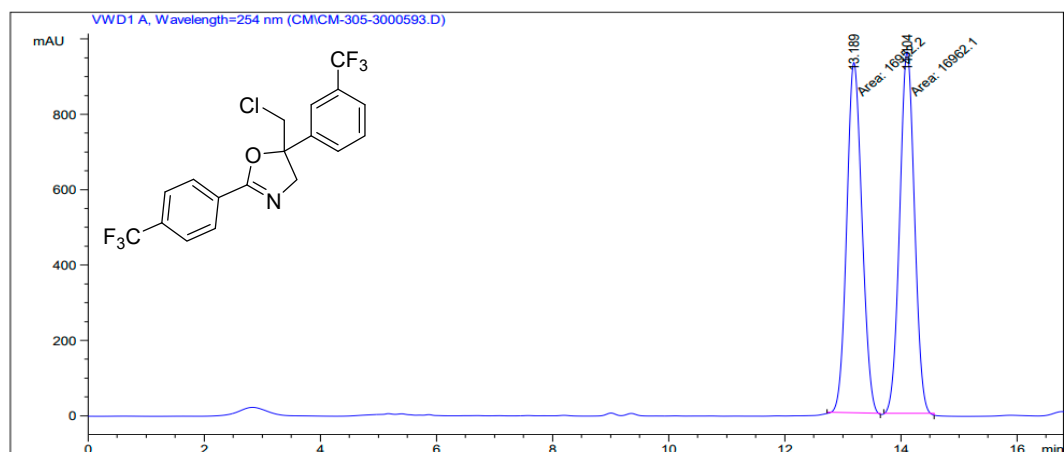

Signal 1: VWD1 A, Wavelength=254 nm

| Peak # | RetTime [min] | Type | Width [min] | Area mAU *s | Height [mAU] | Area %  |
|--------|---------------|------|-------------|-------------|--------------|---------|
| 1      | 13.189        | MM   | 0.3039      | 1.69522e4   | 929.75256    | 49.9853 |
| 2      | 14.104        | MM   | 0.2944      | 1.69621e4   | 960.14893    | 50.0147 |

### Product from enantioselective reaction

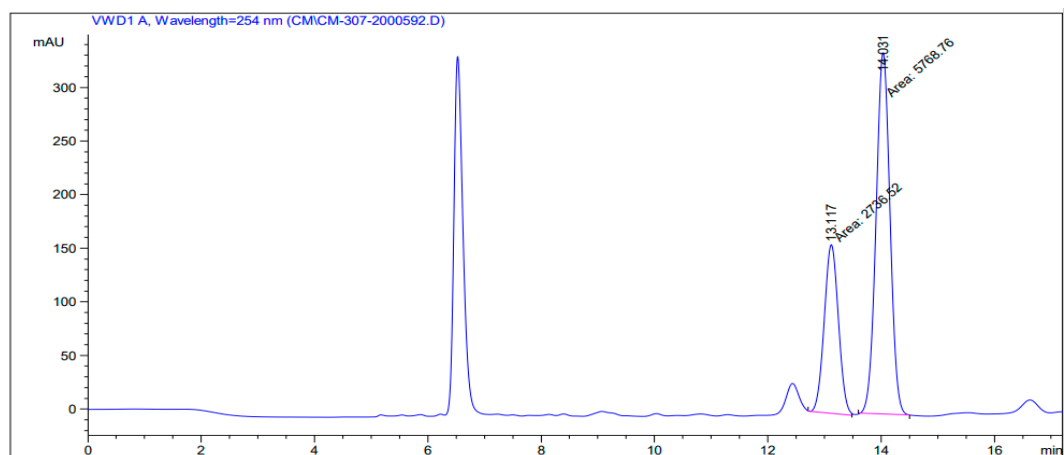

Signal 1: VWD1 A, Wavelength=254 nm

| Peak # | RetTime [min] | Type | Width [min] | Area mAU *s | Height [mAU] | Area %  |
|--------|---------------|------|-------------|-------------|--------------|---------|
| 1      | 13.117        | MM   | 0.2900      | 2736.51831  | 157.27640    | 32.1744 |
| 2      | 14.031        | MM   | 0.2853      | 5768.75635  | 337.04285    | 67.8256 |

### Racemic product

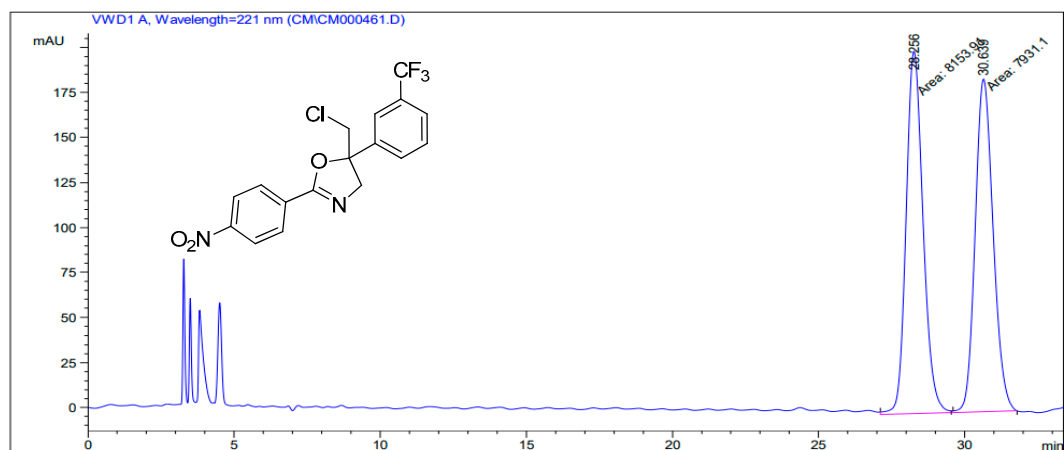

Signal 1: VWD1 A, Wavelength=221 nm

| Peak # | RetTime [min] | Type | Width [min] | Area mAU *s | Height [mAU] | Area %  |
|--------|---------------|------|-------------|-------------|--------------|---------|
| 1      | 28.256        | MM   | 0.6744      | 8153.91260  | 201.51906    | 50.6926 |
| 2      | 30.639        | MM   | 0.7151      | 7931.10010  | 184.83716    | 49.3074 |

### Product from enantioselective reaction

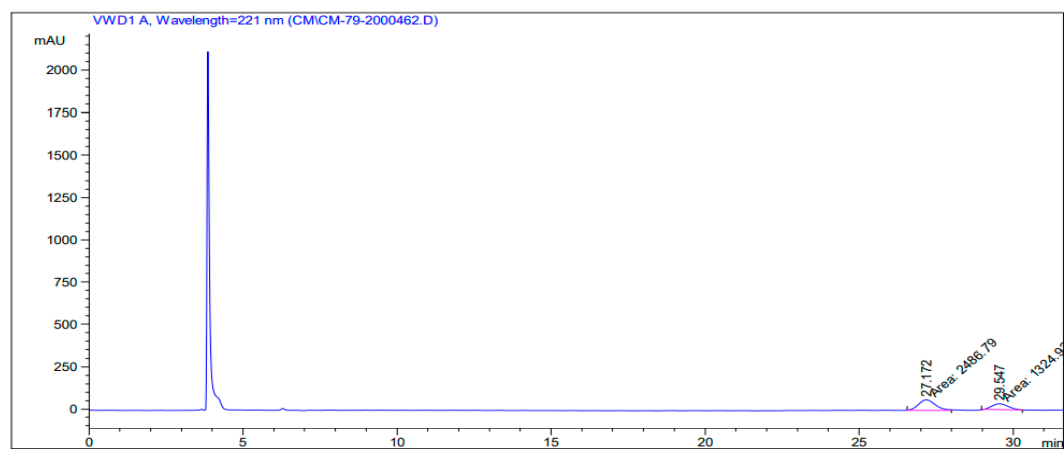

Signal 1: VWD1 A, Wavelength=221 nm

| Peak # | RetTime [min] | Type | Width [min] | Area mAU *s | Height [mAU] | Area %  |
|--------|---------------|------|-------------|-------------|--------------|---------|
| 1      | 27.172        | MM   | 0.6520      | 2486.78882  | 63.57108     | 65.2406 |
| 2      | 29.547        | MM   | 0.6284      | 1324.92944  | 35.14028     | 34.7594 |

### Racemic product

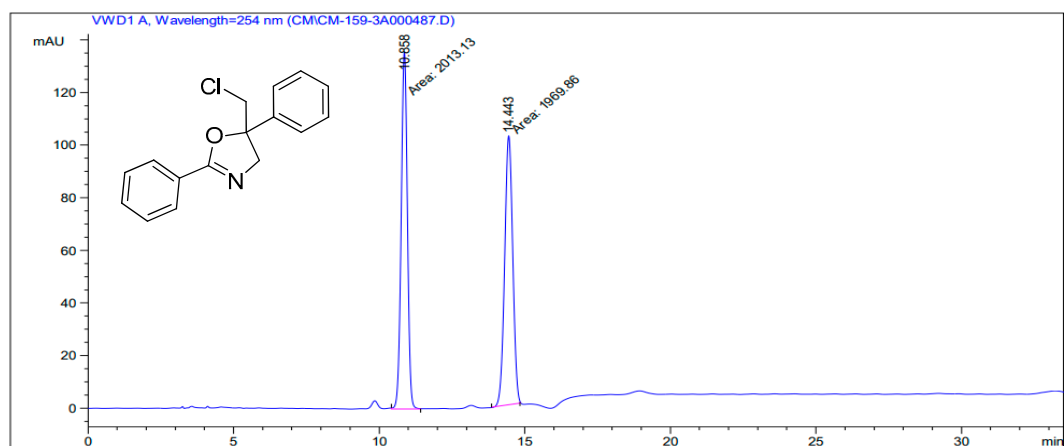

Signal 1: VWD1 A, Wavelength=254 nm

| Peak # | RetTime [min] | Type | Width [min] | Area mAU *s | Height [mAU] | Area %  |
|--------|---------------|------|-------------|-------------|--------------|---------|
| 1      | 10.858        | MM   | 0.2470      | 2013.12927  | 135.84595    | 50.5431 |
| 2      | 14.443        | MM   | 0.3211      | 1969.86279  | 102.23176    | 49.4569 |

### Product from enantioselective reaction

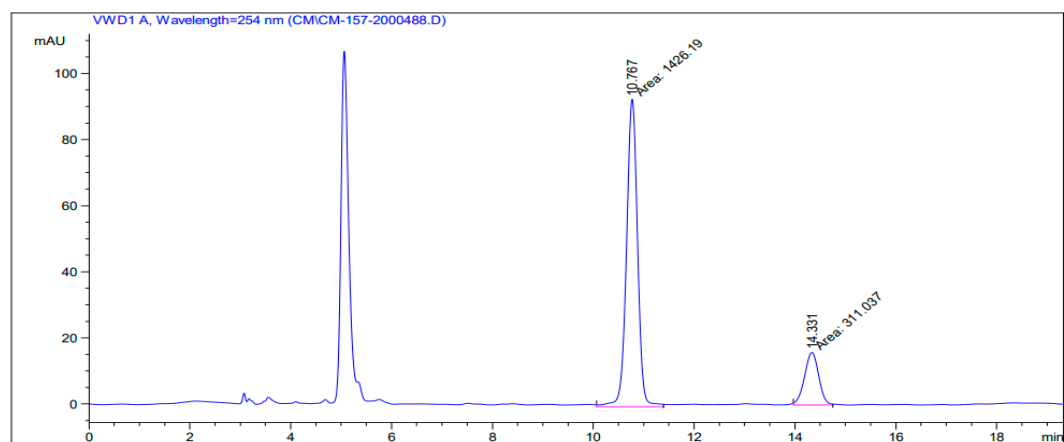

Signal 1: VWD1 A, Wavelength=254 nm

| Peak # | RetTime [min] | Type | Width [min] | Area mAU *s | Height [mAU] | Area %  |
|--------|---------------|------|-------------|-------------|--------------|---------|
| 1      | 10.767        | MM   | 0.2552      | 1426.18823  | 93.12705     | 82.0958 |
| 2      | 14.331        | MM   | 0.3261      | 311.03683   | 15.89640     | 17.9042 |

### Racemic product

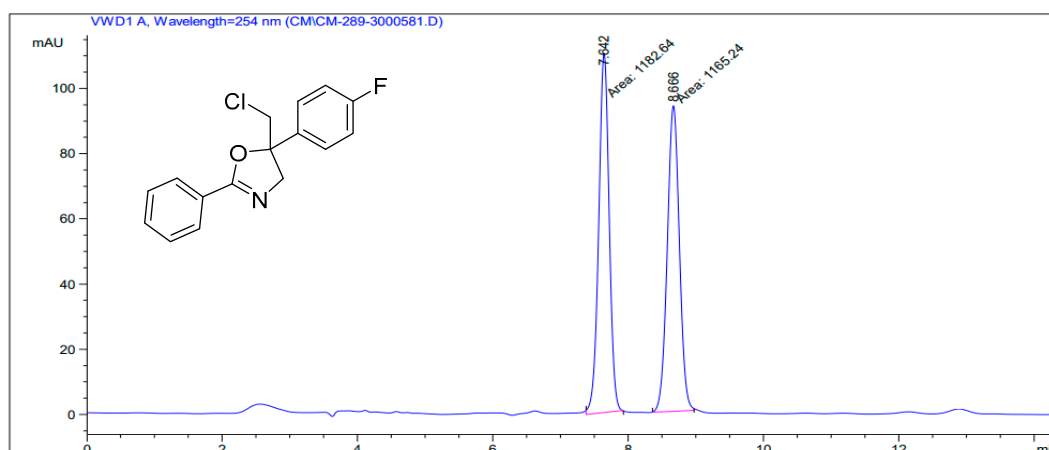

Signal 1: VWD1 A, Wavelength=254 nm

| Peak # | RetTime [min] | Type | Width [min] | Area mAU *s | Height [mAU] | Area %  |
|--------|---------------|------|-------------|-------------|--------------|---------|
| 1      | 7.642         | MM   | 0.1788      | 1182.64307  | 110.26910    | 50.3707 |
| 2      | 8.666         | MM   | 0.2071      | 1165.23511  | 93.76143     | 49.6293 |

### Product from enantioselective reaction

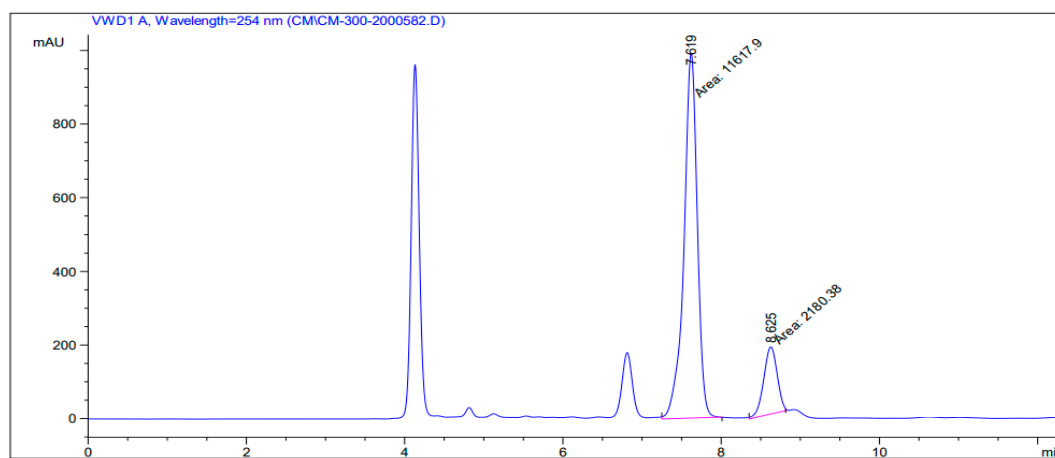

Signal 1: VWD1 A, Wavelength=254 nm

| Peak # | RetTime [min] | Type | Width [min] | Area mAU *s | Height [mAU] | Area %  |
|--------|---------------|------|-------------|-------------|--------------|---------|
| 1      | 7.619         | MM   | 0.1952      | 1.16179e4   | 992.18384    | 84.1981 |
| 2      | 8.625         | MM   | 0.1980      | 2180.38379  | 183.56395    | 15.8019 |

### Racemic product

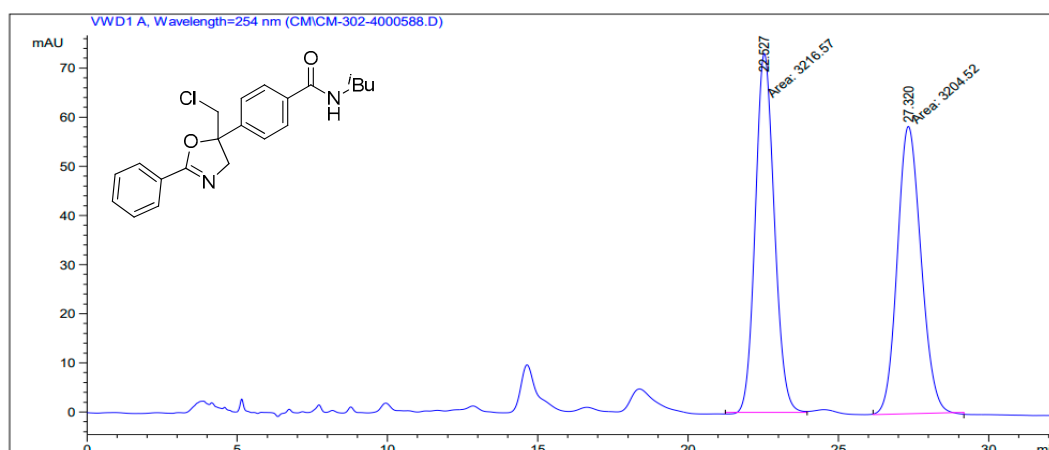

Signal 1: VWD1 A, Wavelength=254 nm

| Peak # | RetTime [min] | Type | Width [min] | Area mAU *s | Height [mAU] | Area %  |
|--------|---------------|------|-------------|-------------|--------------|---------|
| 1      | 22.527        | MM   | 0.7335      | 3216.56738  | 73.08369     | 50.0938 |
| 2      | 27.320        | MM   | 0.9131      | 3204.52124  | 58.49326     | 49.9062 |

### Product from enantioselective reaction

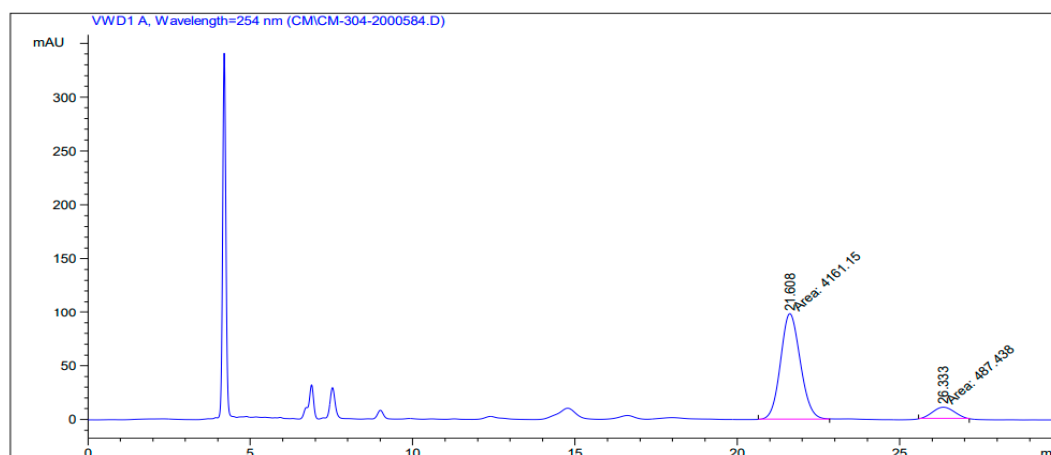

Signal 1: VWD1 A, Wavelength=254 nm

| Peak # | RetTime [min] | Type | Width [min] | Area mAU *s | Height [mAU] | Area %  |
|--------|---------------|------|-------------|-------------|--------------|---------|
| 1      | 21.608        | MM   | 0.7056      | 4161.14600  | 98.28674     | 89.5143 |
| 2      | 26.333        | MM   | 0.7678      | 487.43768   | 10.58071     | 10.4857 |

### Racemic product

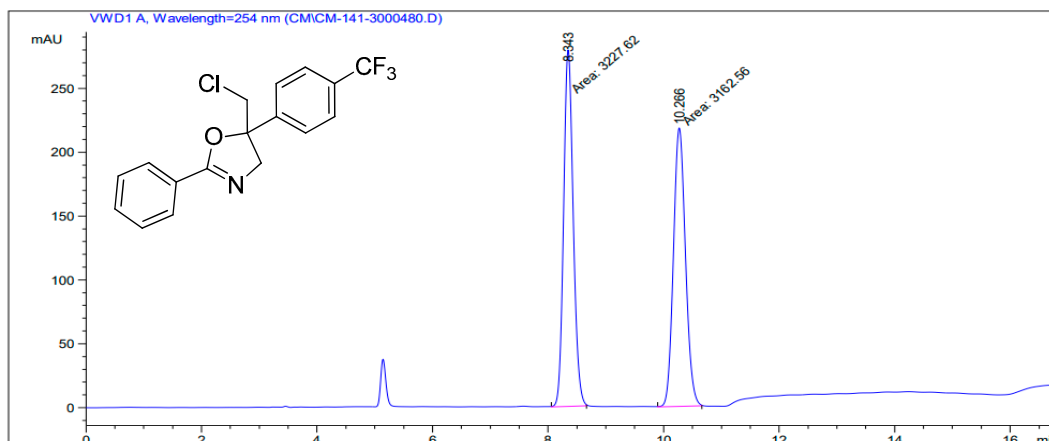

Signal 1: VWD1 A, Wavelength=254 nm

| Peak # | RetTime [min] | Type | Width [min] | Area mAU   | Height [mAU] | Area %  |
|--------|---------------|------|-------------|------------|--------------|---------|
| 1      | 8.343         | MM   | 0.1926      | 3227.61914 | 279.24811    | 50.5091 |
| 2      | 10.266        | MM   | 0.2417      | 3162.56055 | 218.05081    | 49.4909 |

### Product from enantioselective reaction

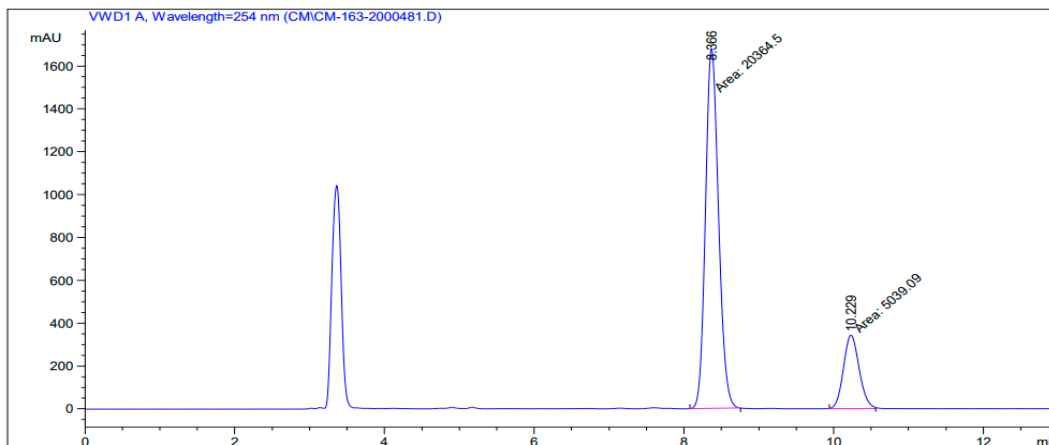

Signal 1: VWD1 A, Wavelength=254 nm

| Peak # | RetTime [min] | Type | Width [min] | Area mAU   | Height [mAU] | Area %  |
|--------|---------------|------|-------------|------------|--------------|---------|
| 1      | 8.366         | MM   | 0.2019      | 2.03645e4  | 1681.23145   | 80.1638 |
| 2      | 10.229        | MM   | 0.2439      | 5039.09277 | 344.33011    | 19.8362 |

### Racemic product

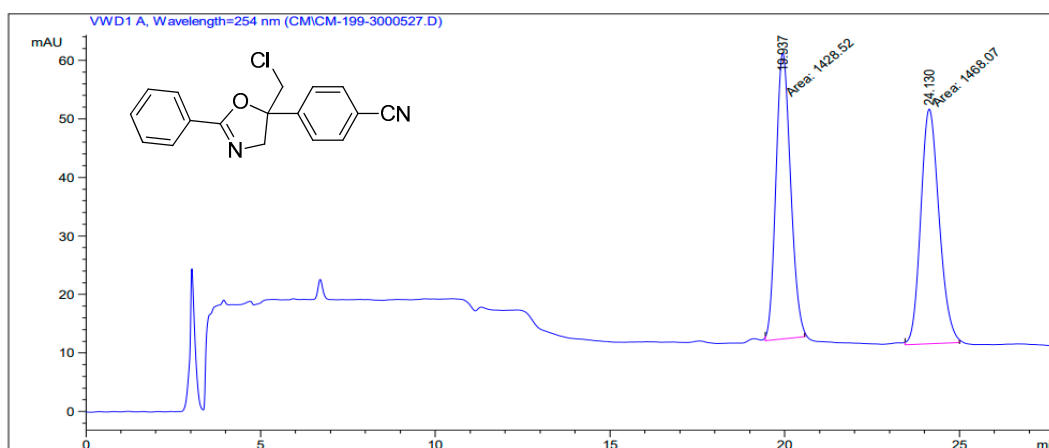

Signal 1: VWD1 A, Wavelength=254 nm

| Peak # | RetTime [min] | Type | Width [min] | Area mAU *s | Height [mAU] | Area %  |
|--------|---------------|------|-------------|-------------|--------------|---------|
| 1      | 19.937        | MM   | 0.4868      | 1428.52417  | 48.90645     | 49.3173 |
| 2      | 24.130        | MM   | 0.6099      | 1468.07251  | 40.11523     | 50.6827 |

### Product from enantioselective reaction

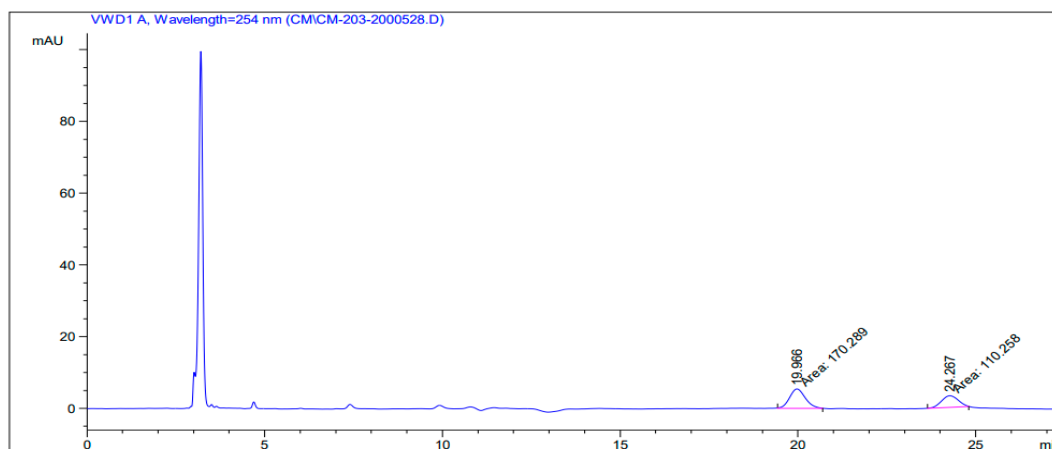

Signal 1: VWD1 A, Wavelength=254 nm

| Peak # | RetTime [min] | Type | Width [min] | Area mAU *s | Height [mAU] | Area %  |
|--------|---------------|------|-------------|-------------|--------------|---------|
| 1      | 19.966        | MM   | 0.5195      | 170.28851   | 5.46335      | 60.6989 |
| 2      | 24.267        | MM   | 0.5579      | 110.25771   | 3.29400      | 39.3011 |

### Racemic product

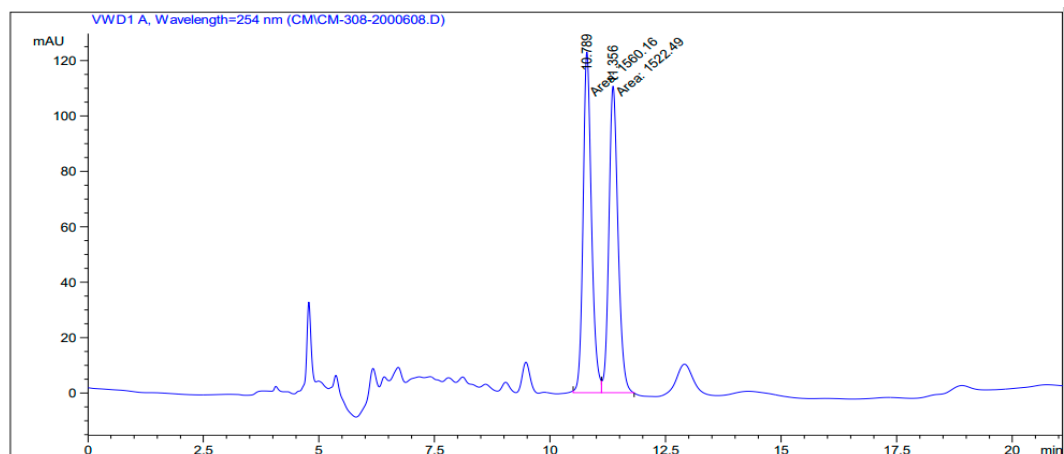

Signal 1: VWD1 A, Wavelength=254 nm

| Peak # | RetTime [min] | Type | Width [min] | Area mAU *s | Height [mAU] | Area %  |
|--------|---------------|------|-------------|-------------|--------------|---------|
| 1      | 10.789        | MF   | 0.2111      | 1560.15967  | 123.17421    | 50.6110 |
| 2      | 11.356        | FM   | 0.2290      | 1522.48779  | 110.79945    | 49.3890 |

### Product from enantioselective reaction

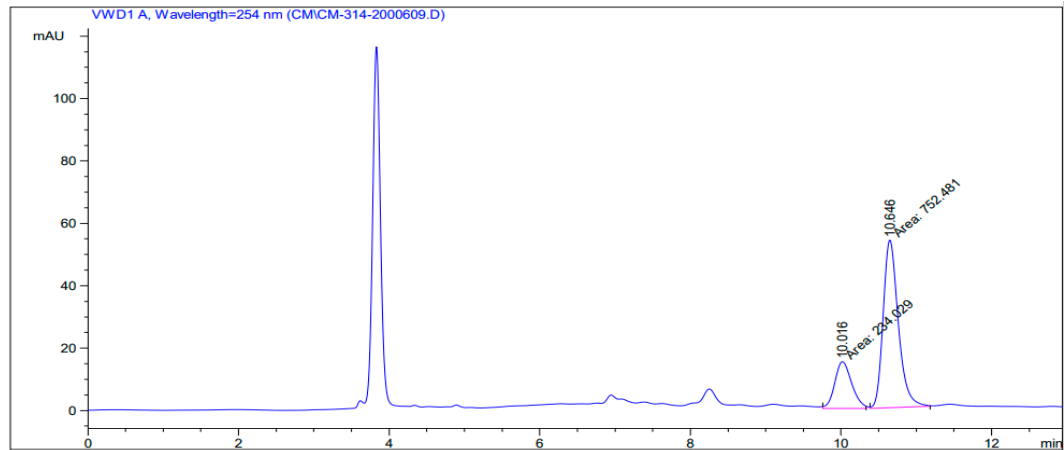

Signal 1: VWD1 A, Wavelength=254 nm

| Peak # | RetTime [min] | Type | Width [min] | Area mAU *s | Height [mAU] | Area %  |
|--------|---------------|------|-------------|-------------|--------------|---------|
| 1      | 10.016        | MM   | 0.2599      | 234.02852   | 15.00996     | 23.7229 |
| 2      | 10.646        | MM   | 0.2332      | 752.48132   | 53.77718     | 76.2771 |

### Racemic product

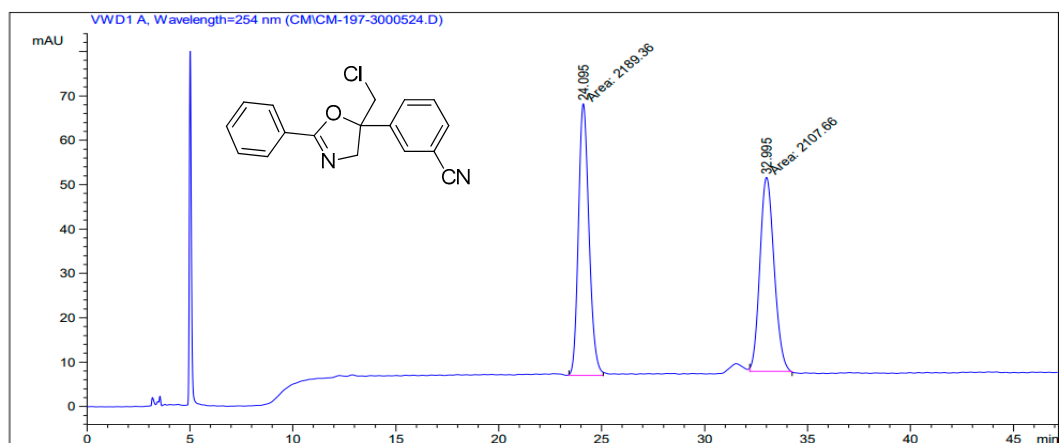

Signal 1: VWD1 A, Wavelength=254 nm

| Peak # | RetTime [min] | Type | Width [min] | Area mAU   | Height [mAU] | Area %  |
|--------|---------------|------|-------------|------------|--------------|---------|
| 1      | 24.095        | MM   | 0.5960      | 2189.35815 | 61.22585     | 50.9506 |
| 2      | 32.995        | MM   | 0.8028      | 2107.66235 | 43.75399     | 49.0494 |

### Product from enantioselective reaction

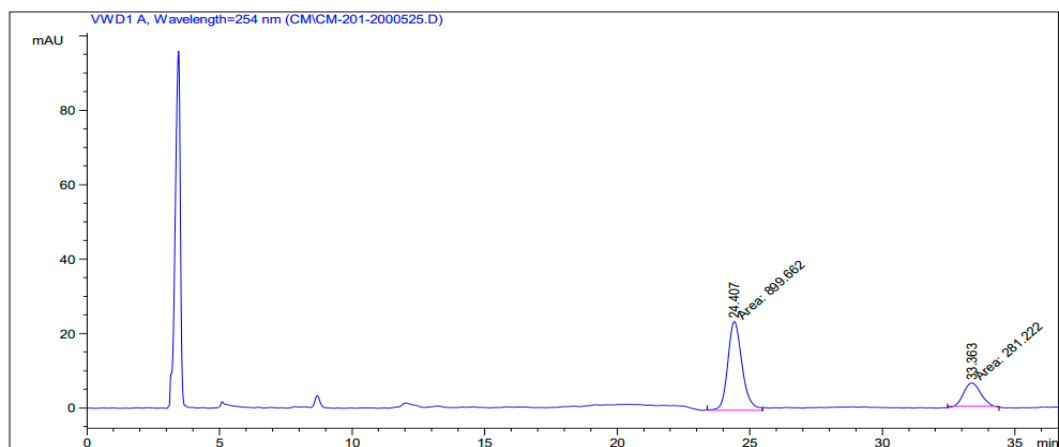

Signal 1: VWD1 A, Wavelength=254 nm

| Peak # | RetTime [min] | Type | Width [min] | Area mAU  | Height [mAU] | Area %  |
|--------|---------------|------|-------------|-----------|--------------|---------|
| 1      | 24.407        | MM   | 0.6279      | 899.66211 | 23.87840     | 76.1854 |
| 2      | 33.363        | MM   | 0.7444      | 281.22244 | 6.29643      | 23.8146 |

### Racemic product

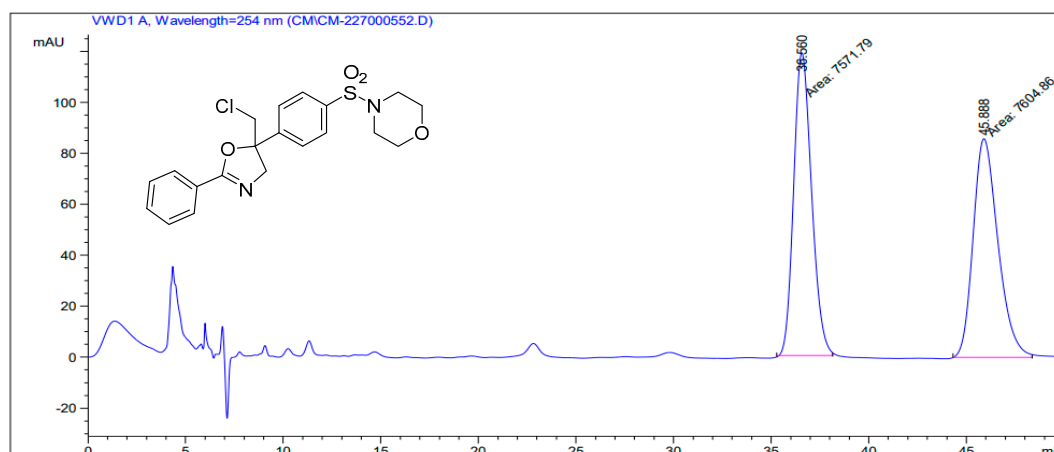

Signal 1: VWD1 A, Wavelength=254 nm

| Peak # | RetTime [min] | Type | Width [min] | Area mAU *s | Height [mAU] | Area %  |
|--------|---------------|------|-------------|-------------|--------------|---------|
| 1      | 36.560        | MM   | 1.0624      | 7571.79395  | 118.78789    | 49.8911 |
| 2      | 45.888        | MM   | 1.4756      | 7604.85645  | 85.89352     | 50.1089 |

### Product from enantioselective reaction

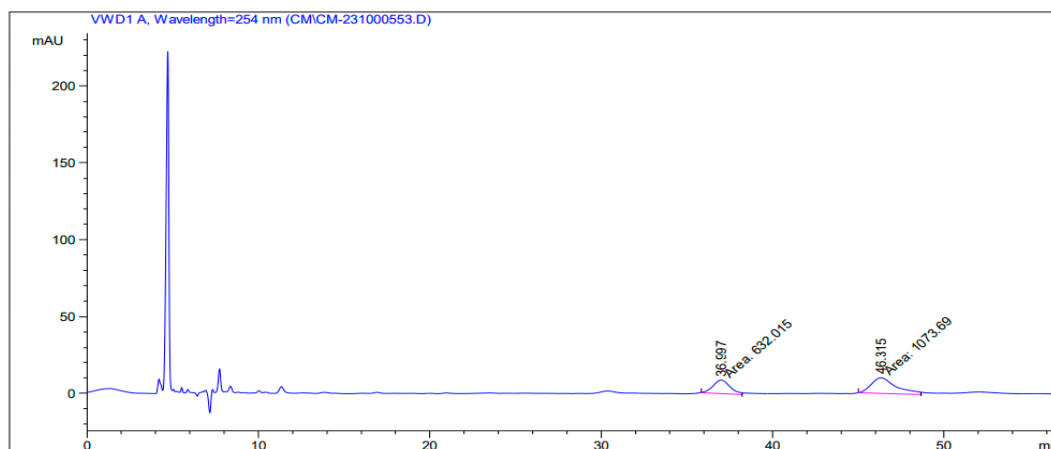

Signal 1: VWD1 A, Wavelength=254 nm

| Peak # | RetTime [min] | Type | Width [min] | Area mAU *s | Height [mAU] | Area %  |
|--------|---------------|------|-------------|-------------|--------------|---------|
| 1      | 36.997        | MM   | 1.1764      | 632.01465   | 8.95406      | 37.0529 |
| 2      | 46.315        | MM   | 1.7400      | 1073.69421  | 10.28434     | 62.9471 |

### Racemic product

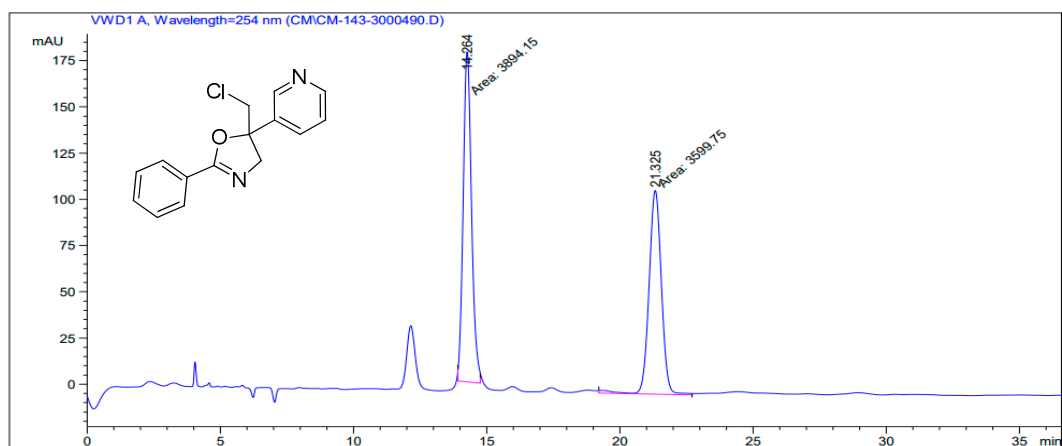

Signal 1: VWD1 A, Wavelength=254 nm

| Peak # | RetTime [min] | Type | Width [min] | Area mAU *s | Height [mAU] | Area %  |
|--------|---------------|------|-------------|-------------|--------------|---------|
| 1      | 14.264        | MM   | 0.3632      | 3894.15430  | 178.69928    | 51.9643 |
| 2      | 21.325        | MM   | 0.5443      | 3599.74878  | 110.21660    | 48.0357 |

### Product from enantioselective reaction

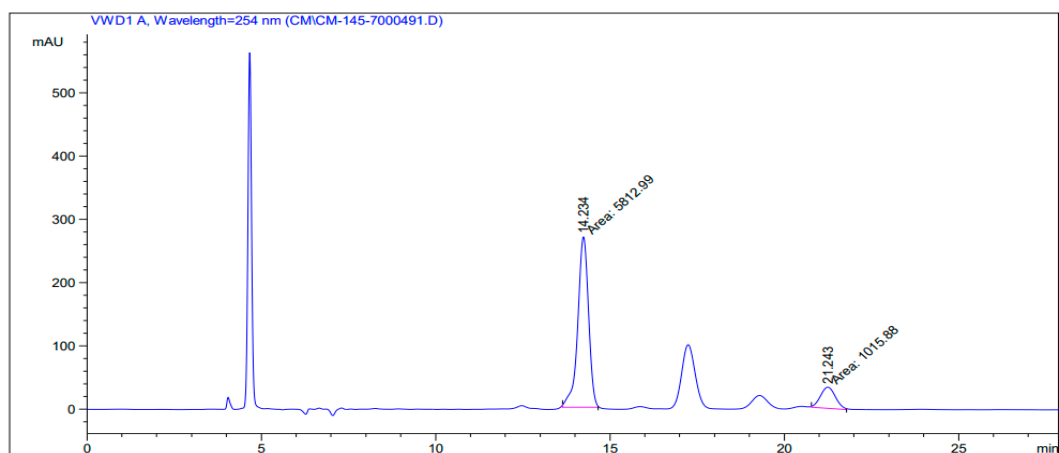

Signal 1: VWD1 A, Wavelength=254 nm

| Peak # | RetTime [min] | Type | Width [min] | Area mAU *s | Height [mAU] | Area %  |
|--------|---------------|------|-------------|-------------|--------------|---------|
| 1      | 14.234        | MM   | 0.3588      | 5812.99170  | 269.99182    | 85.1237 |
| 2      | 21.243        | MM   | 0.5011      | 1015.88348  | 33.78618     | 14.8763 |

### Racemic product

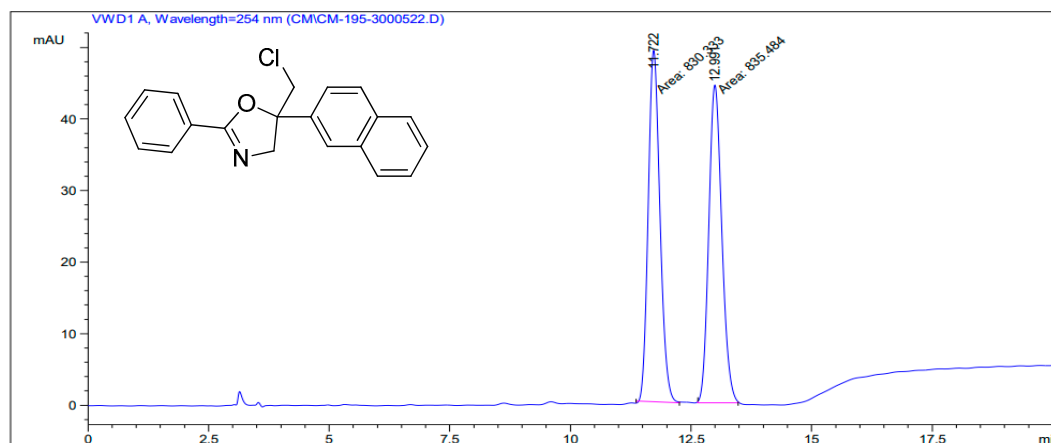

Signal 1: VWD1 A, Wavelength=254 nm

| Peak # | RetTime [min] | Type | Width [min] | Area mAU  | Height [mAU] | Area %  |
|--------|---------------|------|-------------|-----------|--------------|---------|
| 1      | 11.722        | MM   | 0.2817      | 830.33325 | 49.11953     | 49.8454 |
| 2      | 12.991        | MM   | 0.3133      | 835.48376 | 44.43855     | 50.1546 |

### Product from enantioselective reaction

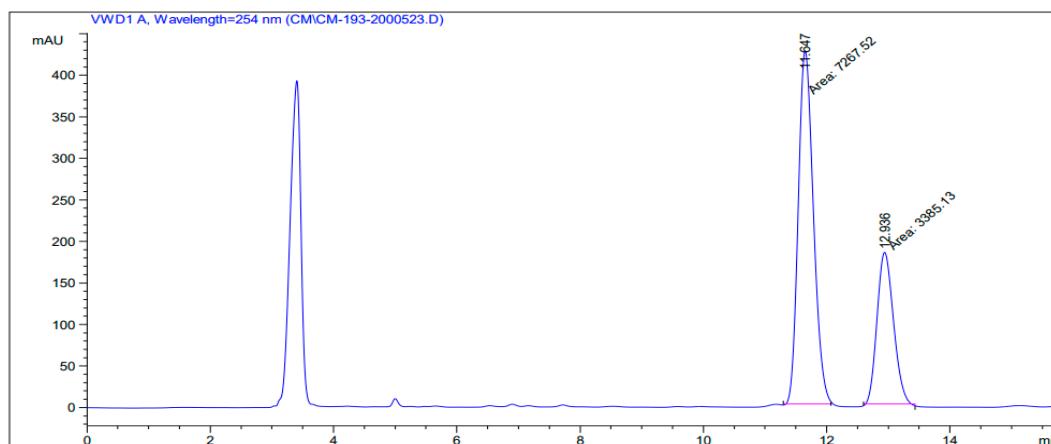

Signal 1: VWD1 A, Wavelength=254 nm

| Peak # | RetTime [min] | Type | Width [min] | Area mAU   | Height [mAU] | Area %  |
|--------|---------------|------|-------------|------------|--------------|---------|
| 1      | 11.647        | MM   | 0.2848      | 7267.52148 | 425.29709    | 68.2227 |
| 2      | 12.936        | MM   | 0.3088      | 3385.12573 | 182.72333    | 31.7773 |

### Racemic product

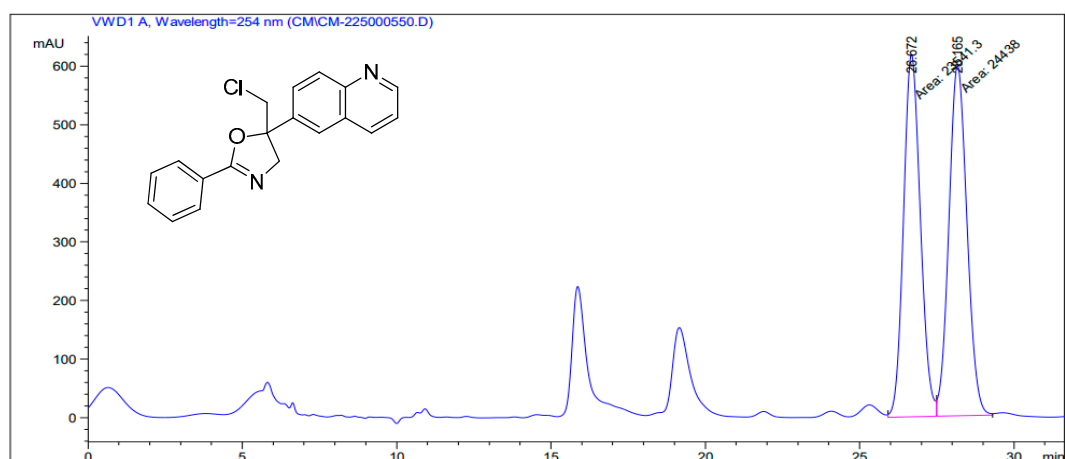

Signal 1: VWD1 A, Wavelength=254 nm

| Peak # | RetTime [min] | Type | Width [min] | Area mAU *s | Height [mAU] | Area %  |
|--------|---------------|------|-------------|-------------|--------------|---------|
| 1      | 26.672        | MF   | 0.6340      | 2.35413e4   | 618.88348    | 49.0655 |
| 2      | 28.165        | FM   | 0.6808      | 2.44380e4   | 598.27405    | 50.9345 |

### Product from enantioselective reaction

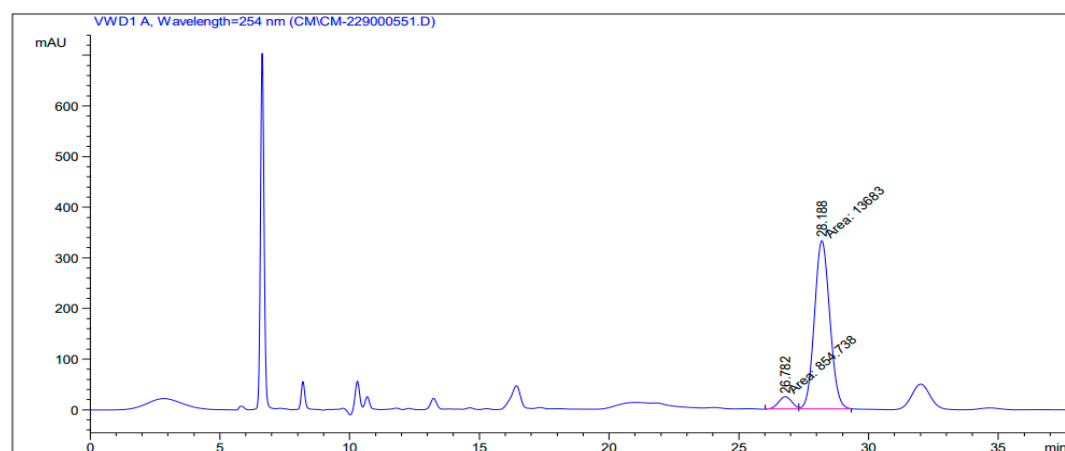

Signal 1: VWD1 A, Wavelength=254 nm

| Peak # | RetTime [min] | Type | Width [min] | Area mAU *s | Height [mAU] | Area %  |
|--------|---------------|------|-------------|-------------|--------------|---------|
| 1      | 26.782        | MF   | 0.5923      | 854.73798   | 24.04999     | 5.8794  |
| 2      | 28.188        | FM   | 0.6865      | 1.36830e4   | 332.20920    | 94.1206 |

### Racemic product

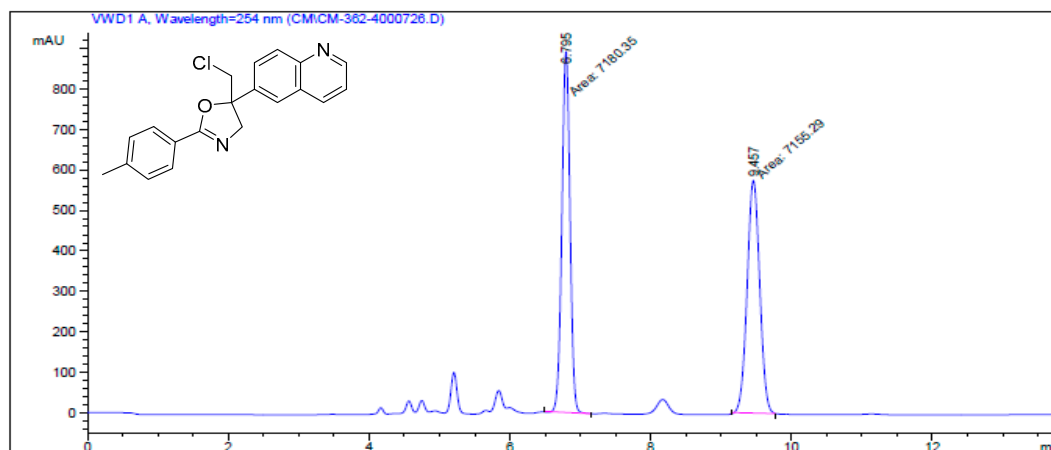

Signal 1: VWD1 A, Wavelength=254 nm

| Peak # | RetTime [min] | Type | Width [min] | Area mAU   | Height [mAU] | Area %  |
|--------|---------------|------|-------------|------------|--------------|---------|
| 1      | 6.795         | MM   | 0.1338      | 7180.35449 | 894.50604    | 50.0874 |
| 2      | 9.457         | MM   | 0.2069      | 7155.29102 | 576.28223    | 49.9126 |

### Product from enantioselective reaction

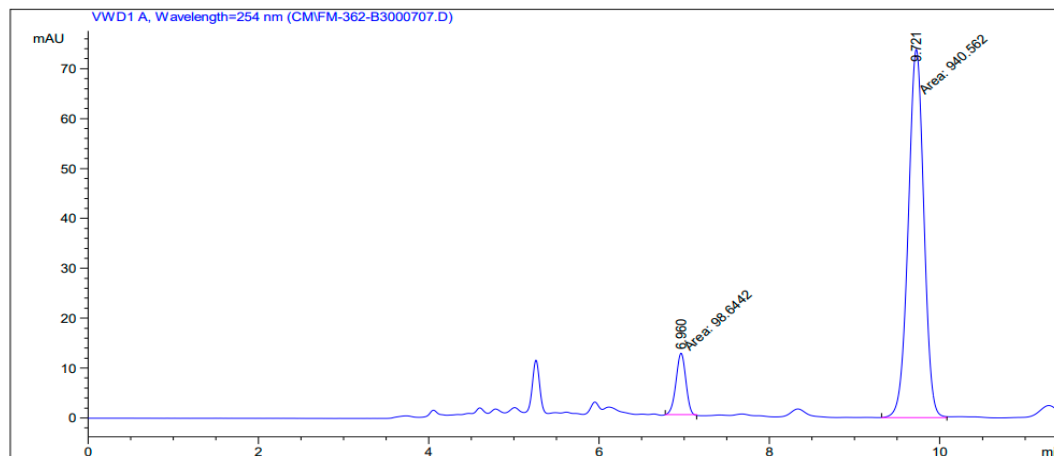

Signal 1: VWD1 A, Wavelength=254 nm

| Peak # | RetTime [min] | Type | Width [min] | Area mAU  | Height [mAU] | Area %  |
|--------|---------------|------|-------------|-----------|--------------|---------|
| 1      | 6.960         | MM   | 0.1332      | 98.64417  | 12.34398     | 9.4923  |
| 2      | 9.721         | MM   | 0.2123      | 940.56232 | 73.83438     | 90.5077 |

### Racemic product

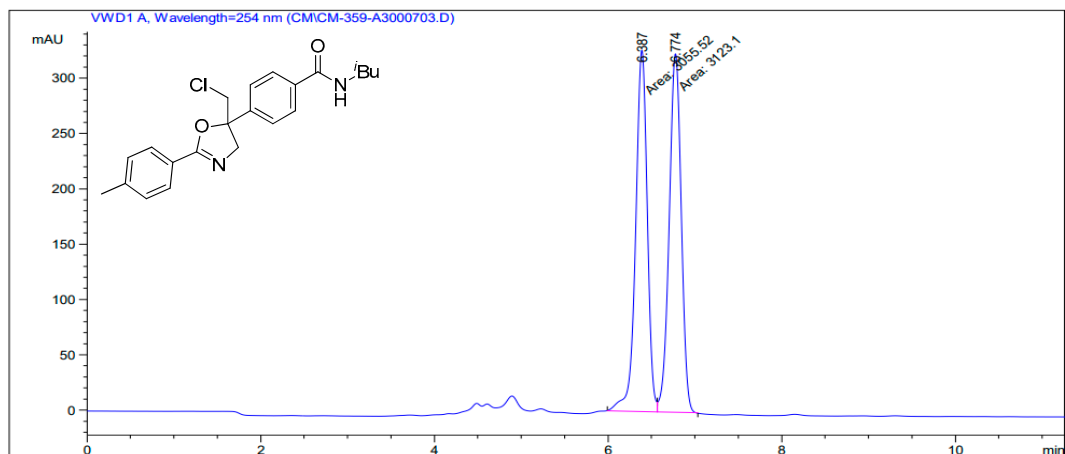

Signal 1: VWD1 A, Wavelength=254 nm

| Peak # | RetTime [min] | Type | Width [min] | Area mAU*s | Height [mAU] | Area %  |
|--------|---------------|------|-------------|------------|--------------|---------|
| 1      | 6.387         | MF   | 0.1558      | 3055.51514 | 326.81030    | 49.4531 |
| 2      | 6.774         | FM   | 0.1605      | 3123.10034 | 324.29355    | 50.5469 |

### Product from enantioselective reaction

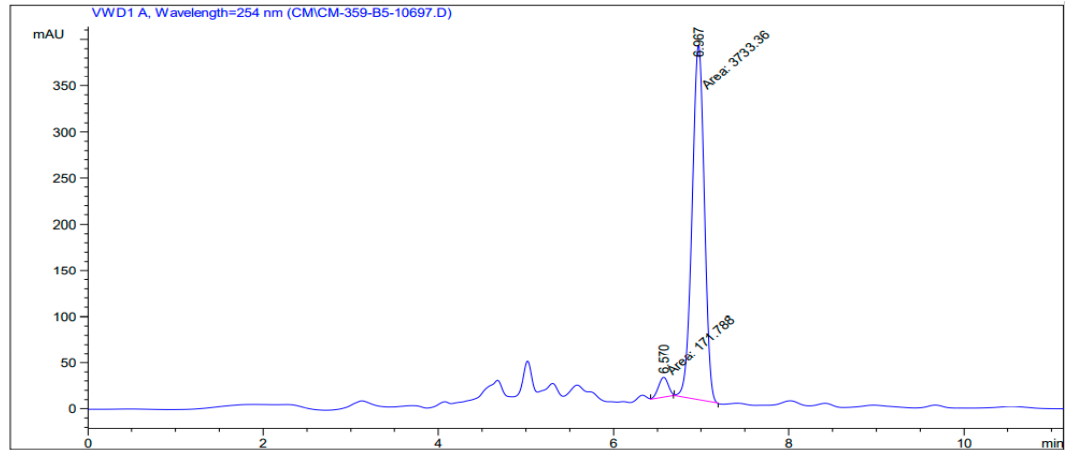

Signal 1: VWD1 A, Wavelength=254 nm

| Peak # | RetTime [min] | Type | Width [min] | Area mAU*s | Height [mAU] | Area %  |
|--------|---------------|------|-------------|------------|--------------|---------|
| 1      | 6.570         | MM   | 0.1313      | 171.78766  | 21.81222     | 4.3990  |
| 2      | 6.967         | MM   | 0.1618      | 3733.36353 | 384.60712    | 95.6010 |

### NMR Spectra

CC(=O)c1ccc(C(F)(F)F)cc1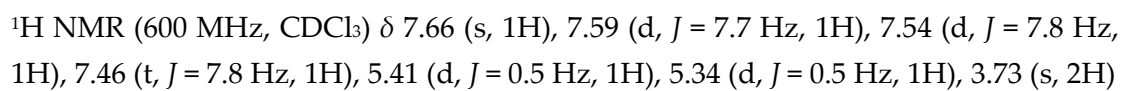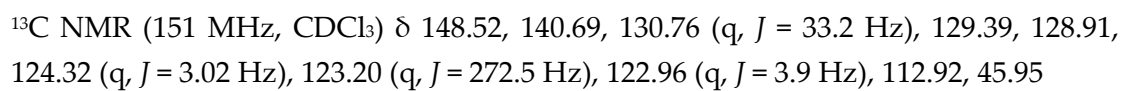

**2-(4-fluorophenyl)prop-2-en-1-amine (5c)**

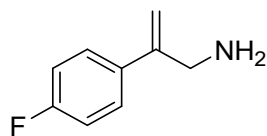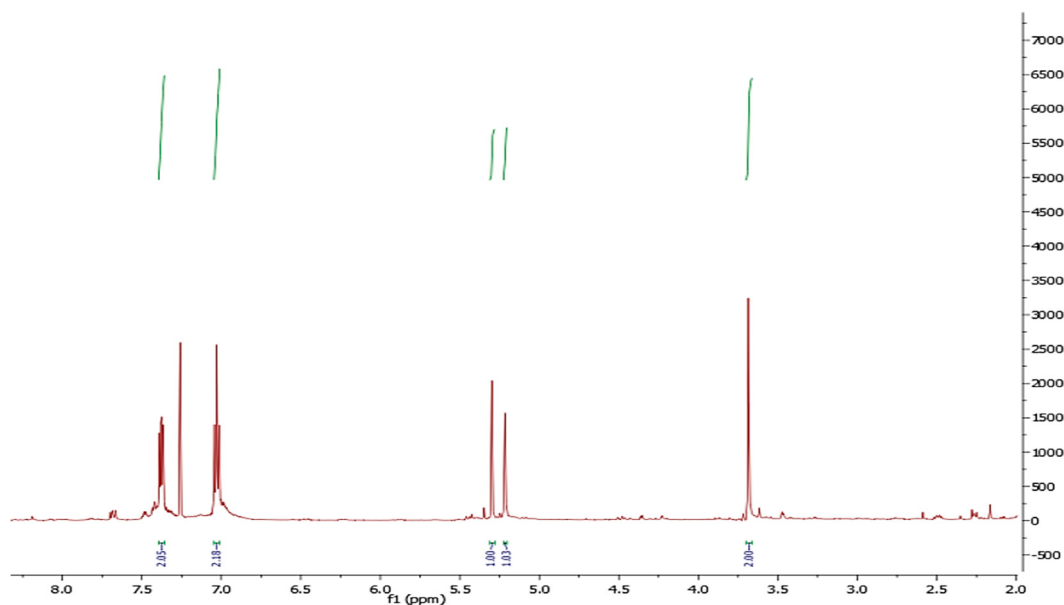

$^1\text{H}$  NMR (600 MHz,  $\text{CDCl}_3$ )  $\delta$  7.39 – 7.36 (m, 2H), 7.05 – 7.01 (m, 2H), 5.30 (s, 1H), 5.22 (s, 1H), 3.68 (d,  $J$  = 7.9 Hz, 2H)

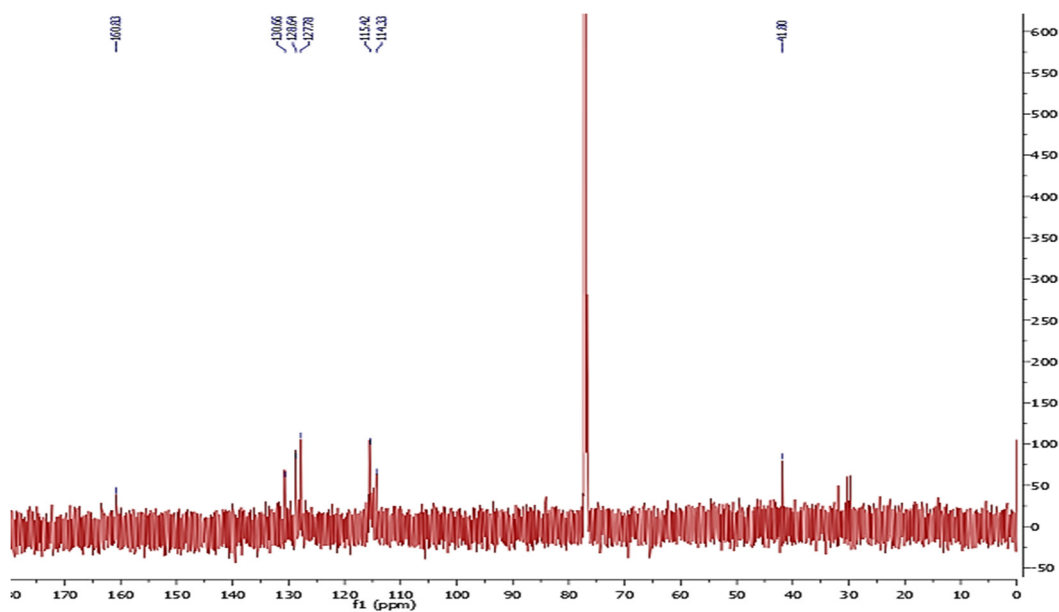

$^{13}\text{C}$  NMR (151 MHz,  $\text{CDCl}_3$ )  $\delta$  160.83 (d,  $J$  = 242.1 Hz), 130.66 (d,  $J$  = 9.06 Hz), 128.64 (d,  $J$  = 12.08 Hz), 127.78, 115.42 (d,  $J$  = 22.65 Hz), 114.33, 41.80

**2-(4-(isobutylcarbamoyl)phenyl)prop-2-en-1-aminium methanesulfonate (5d)**

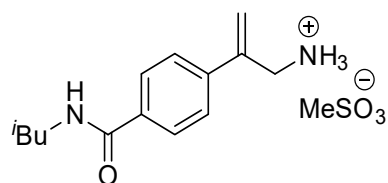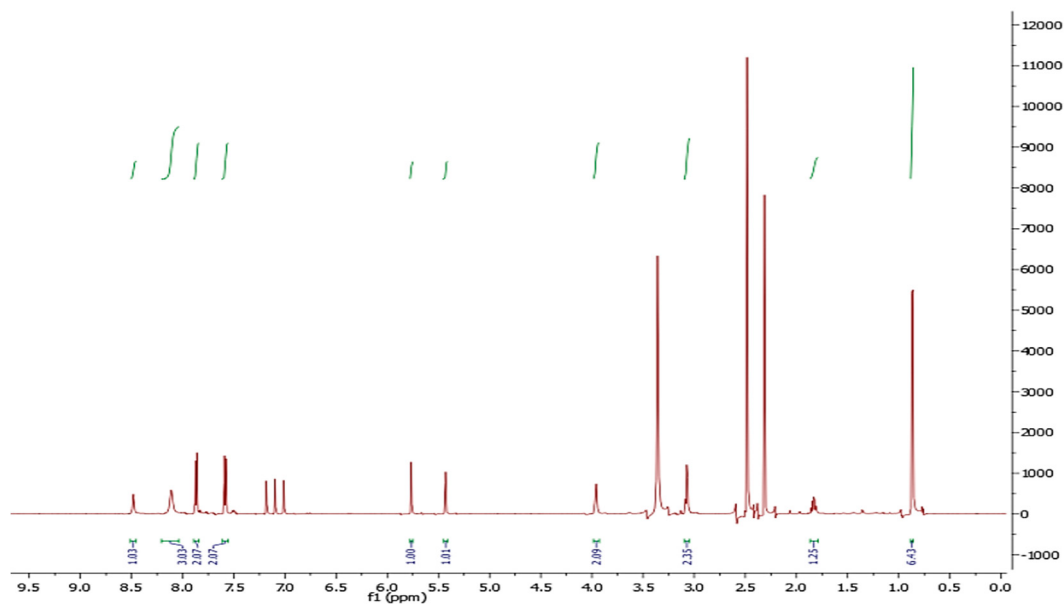

$^1\text{H}$  NMR (600 MHz, DMSO)  $\delta$  8.48 (t,  $J$  = 5.7 Hz, 1H), 8.11 (s, 3H), 7.87 (d,  $J$  = 8.4 Hz, 2H), 7.58 (d,  $J$  = 8.4 Hz, 2H), 5.77 (s, 1H), 5.43 (s, 1H), 3.96 (d,  $J$  = 5.5 Hz, 2H), 3.07 (dd,  $J$  = 13.3, 7.0 Hz, 2H), 1.83 (dt,  $J$  = 13.5, 6.8 Hz, 1H), 0.87 (d,  $J$  = 6.7 Hz, 6H)

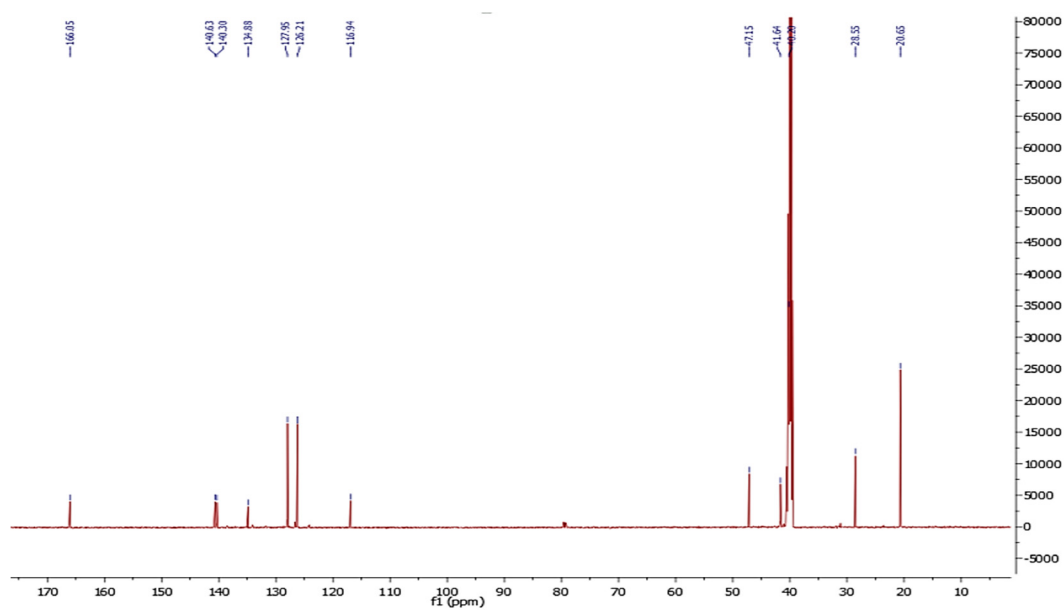

$^{13}\text{C}$  NMR (151 MHz, DMSO)  $\delta$  166.05, 140.63, 140.30, 134.88, 127.95, 126.21, 116.94, 47.15, 41.64, 40.20, 28.55, 20.65

**2-(4-(trifluoromethyl)phenyl)prop-2-en-1-amine (5e)**

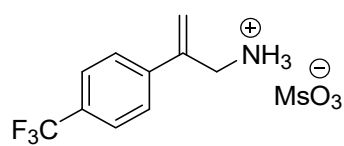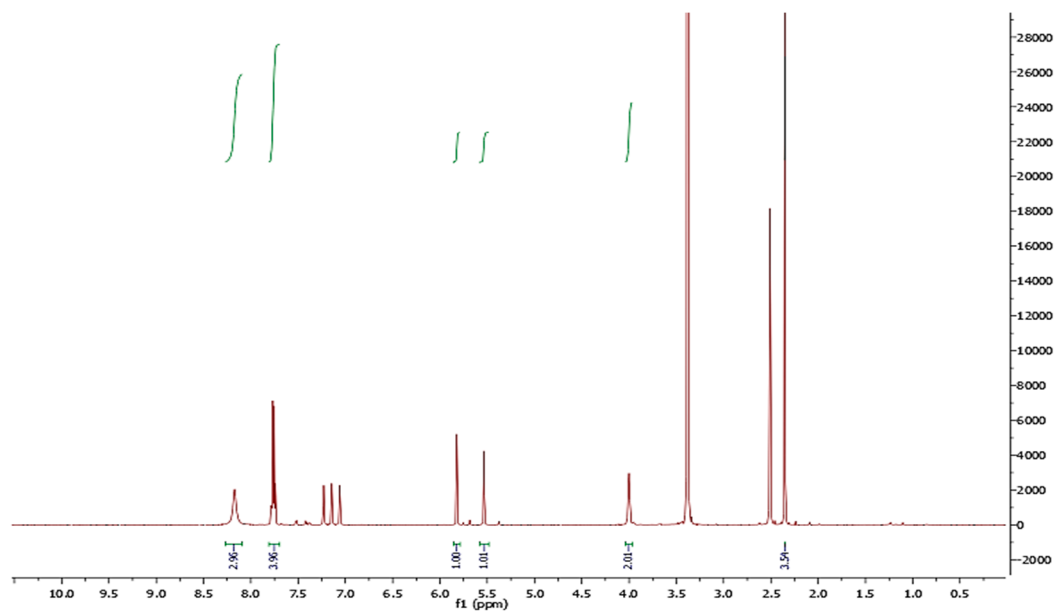

$^1\text{H}$  NMR (600 MHz, DMSO)  $\delta$  8.17 (s, 3H), 7.76 (q,  $J$  = 8.5 Hz, 4H), 5.82 (s, 1H), 5.53 (s, 1H), 4.00 (s, 2H), 2.35 (s, 3H)

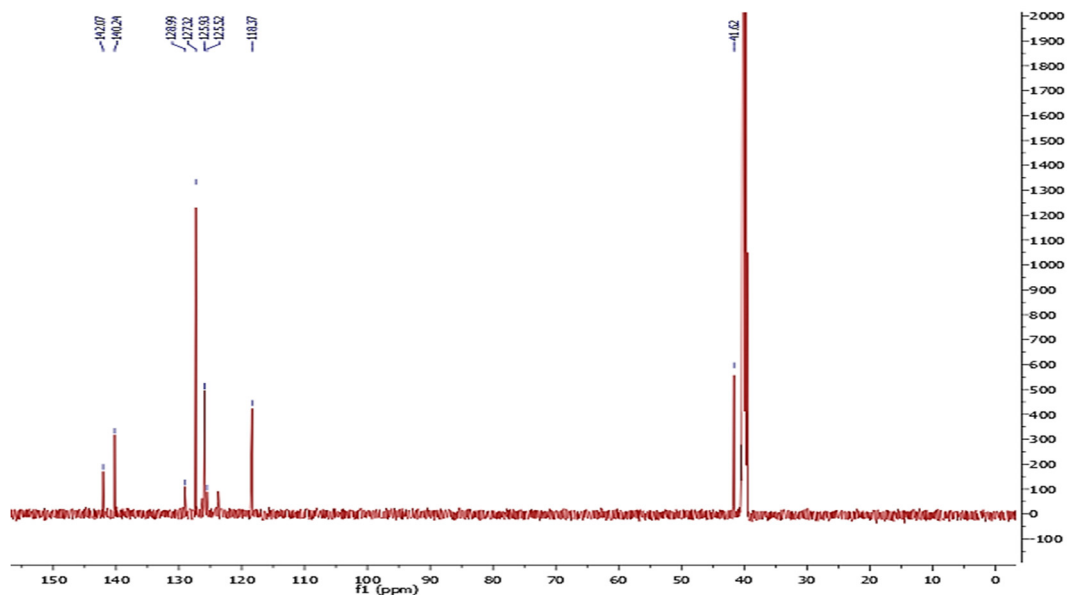

$^{13}\text{C}$  NMR (151 MHz, DMSO)  $\delta$  142.07, 140.24, 128.99 (q,  $J$  = 32.01 Hz), 127.32, 125.93 (q,  $J$  = 4.53 Hz), 125.52 (q,  $J$  = 271.8 Hz), 118.37, 41.62

**4-(3-aminoprop-1-en-2-yl)benzonitrile (5f)**

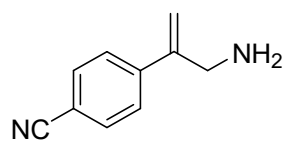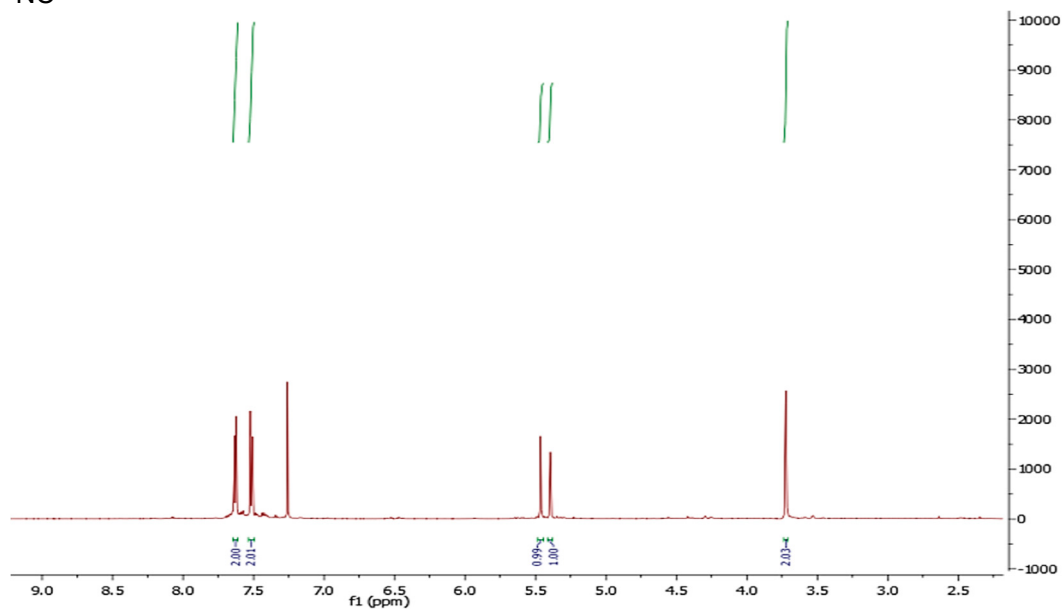

<sup>1</sup>H NMR (600 MHz, CDCl<sub>3</sub>)  $\delta$  7.63 (d, 2H), 7.52 (d, 2H), 5.46 (s, 1H), 5.39 (s, 1H), 3.72 (d, 2H)

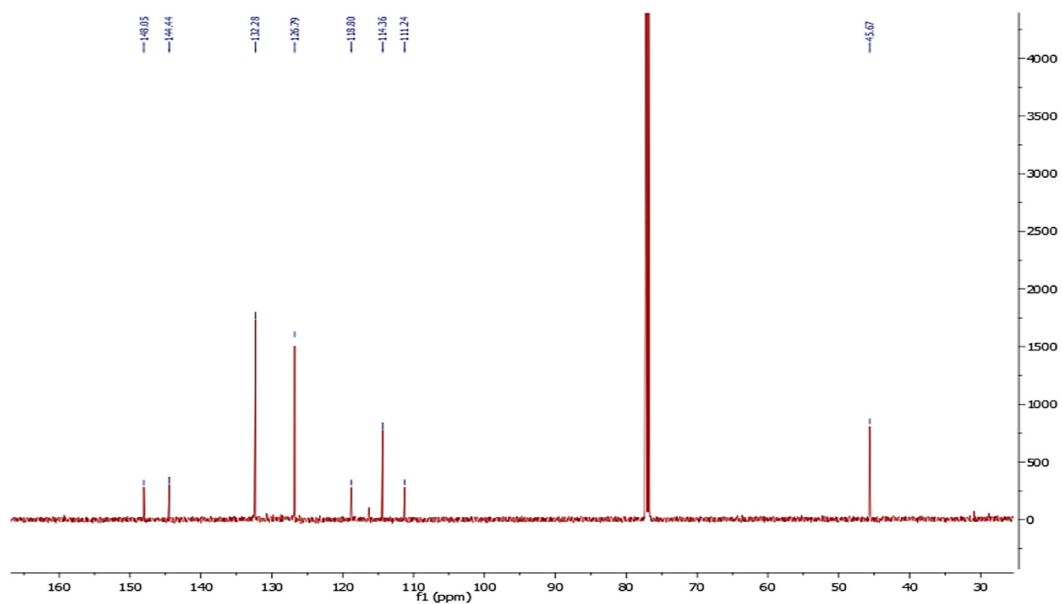

<sup>13</sup>C NMR (151 MHz, CDCl<sub>3</sub>)  $\delta$  148.05, 144.44, 132.28, 126.79, 118.80, 114.36, 111.24, 45.67

**2-(3-methoxyphenyl)prop-2-en-1-amine (5g)**

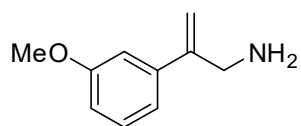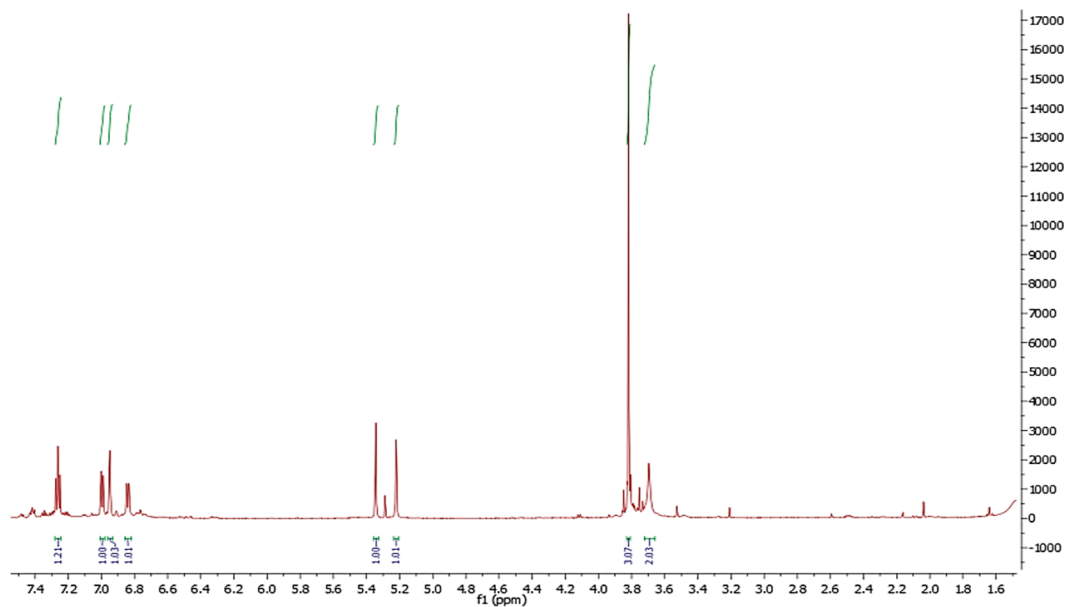

<sup>1</sup>H NMR (600 MHz, CDCl<sub>3</sub>)  $\delta$  7.26 (dd,  $J$  = 9.0, 6.9 Hz, 1H), 7.00 (d,  $J$  = 7.7 Hz, 1H), 6.96 – 6.93 (m, 1H), 6.84 (dt,  $J$  = 8.1, 4.0 Hz, 1H), 5.34 (s, 1H), 5.22 (s, 1H), 3.82 (s,  $J$  = 4.9 Hz, 2H), 3.70 (s, 2H)

NC(=C)c1ccc(C#N)cc1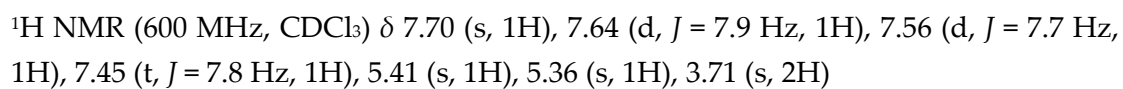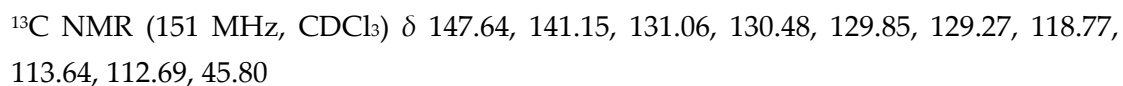

**2-(4-(morpholinosulfonyl)phenyl)prop-2-en-1-amine (5i)**

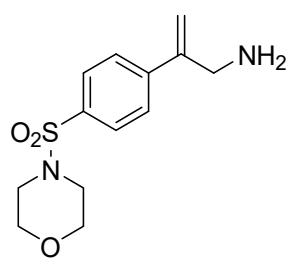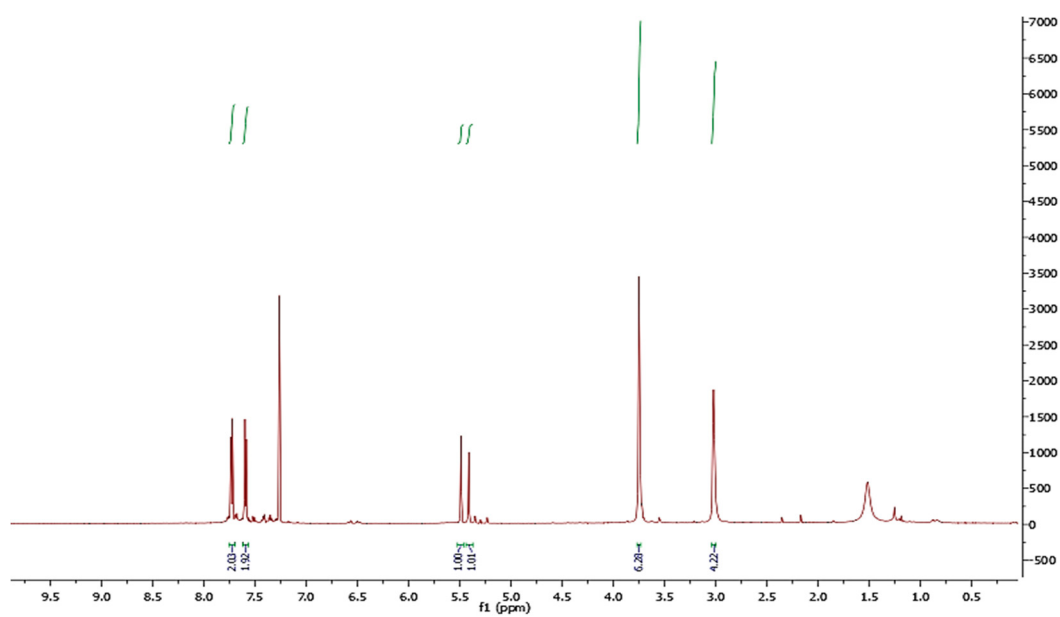

$^1\text{H}$  NMR (600 MHz,  $\text{CDCl}_3$ )  $\delta$  7.72 (d,  $J$  = 8.4 Hz, 2H), 7.59 (d,  $J$  = 8.3 Hz, 2H), 5.49 (s, 1H), 5.41 (s, 1H), 3.77 – 3.73 (m, 6H), 3.04 – 3.00 (m, 4H)

**2-(pyridin-3-yl)prop-2-en-1-amine (5j)**

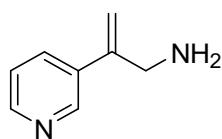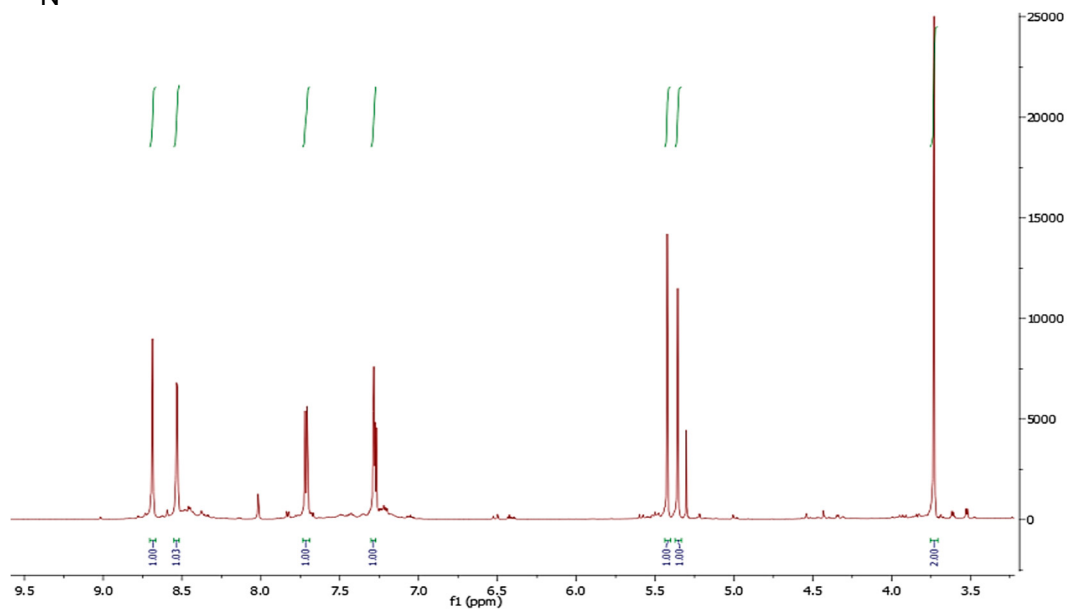

$^1\text{H}$  NMR (600 MHz,  $\text{CDCl}_3$ )  $\delta$  8.69 (d,  $J$  = 2.0 Hz, 1H), 8.53 (dd,  $J$  = 4.8, 1.4 Hz, 1H), 7.74 – 7.69 (m, 1H), 7.30 – 7.27 (m, 1H), 5.42 (s, 1H), 5.36 (s, 1H), 3.73 (s, 2H)

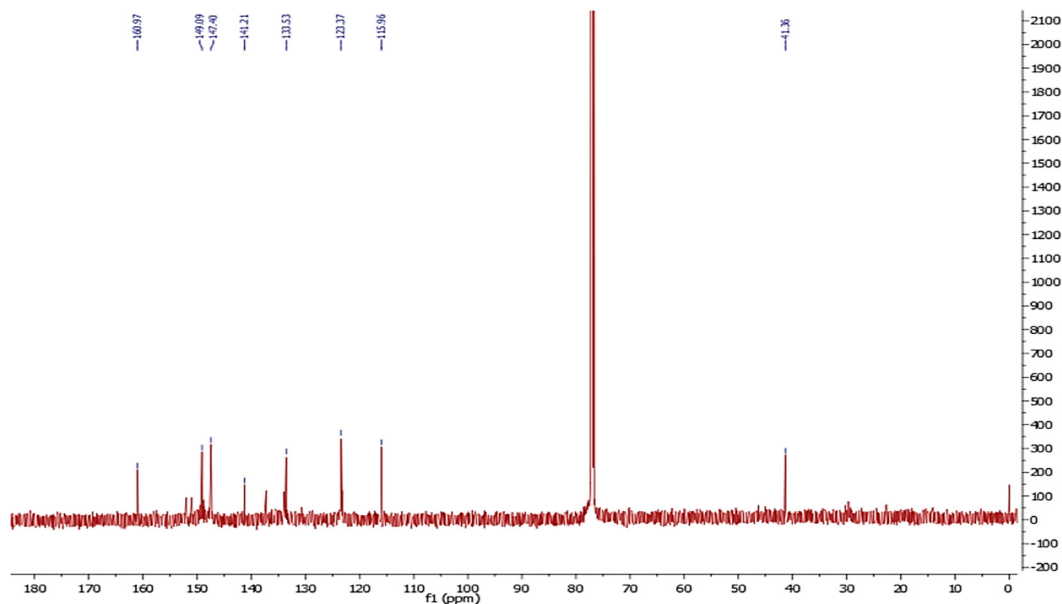

$^{13}\text{C}$  NMR (151 MHz,  $\text{CDCl}_3$ )  $\delta$  160.97, 149.09, 147.40, 141.21, 133.53, 123.37, 115.96, 41.36

**2-(quinolin-6-yl)prop-2-en-1-amine (5l)**

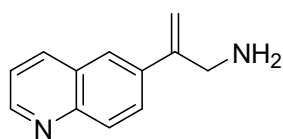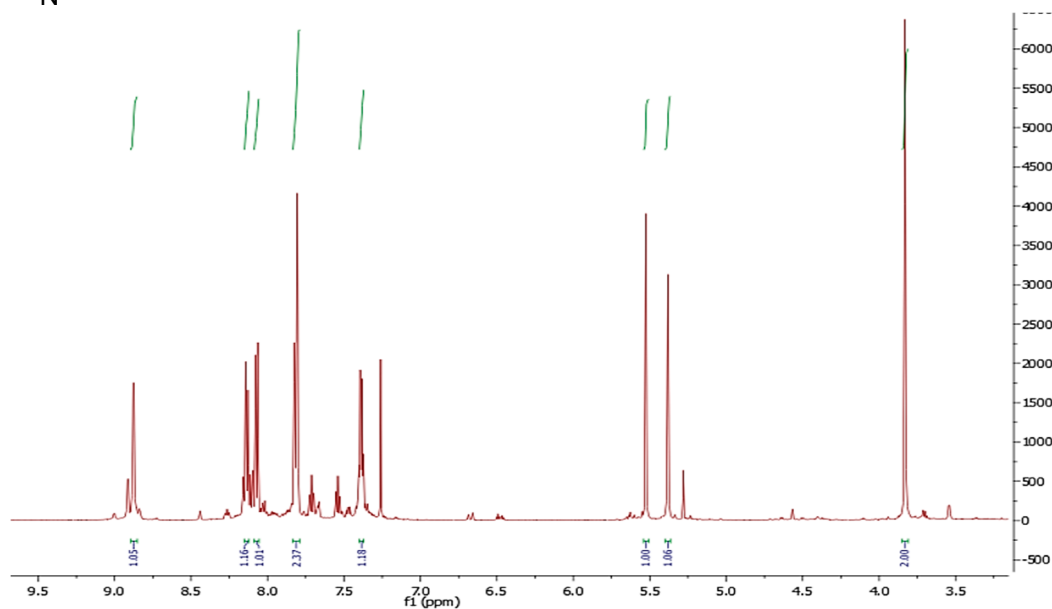

$^1\text{H}$  NMR (600 MHz,  $\text{CDCl}_3$ )  $\delta$  8.88 (dd,  $J = 4.2, 1.6$  Hz, 1H), 8.14 (d,  $J = 8.4$  Hz, 1H), 8.07 (d,  $J = 8.7$  Hz, 1H), 7.82 (dd,  $J = 10.9, 2.1$  Hz, 2H), 7.38 (dd,  $J = 8.2, 4.2$  Hz, 1H), 5.53 (s, 1H), 5.38 (s, 1H), 3.83 (s, 2H)

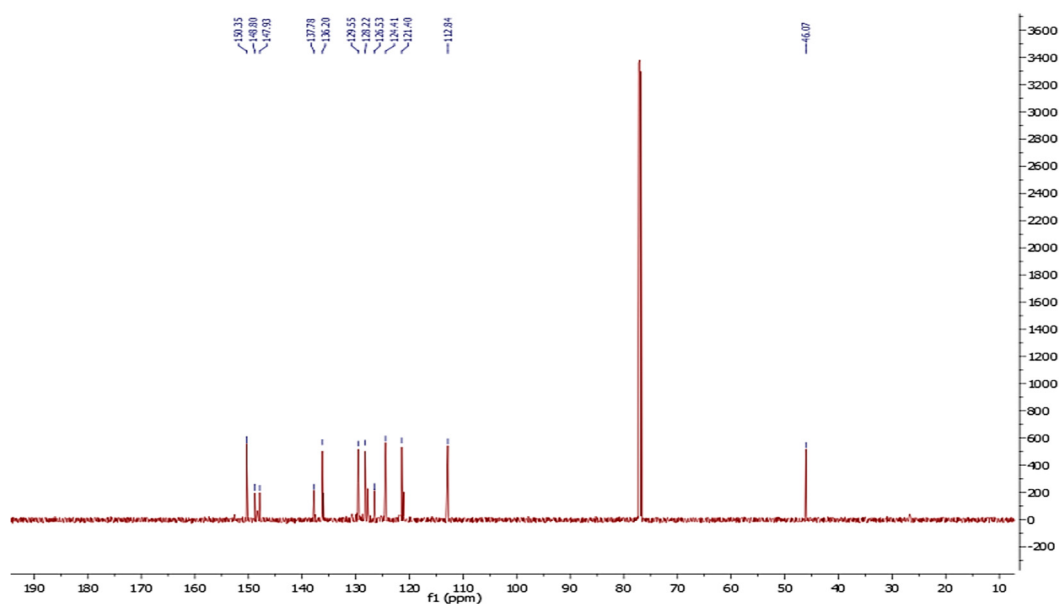

$^{13}\text{C}$  NMR (151 MHz,  $\text{CDCl}_3$ )  $\delta$  150.35, 148.80, 147.93, 137.78, 136.20, 129.55, 128.22, 126.53, 124.41, 121.40, 112.84, 46.07

**4-methoxy-N-(2-(3-(trifluoromethyl)phenyl) allyl) benzamide (6a)**

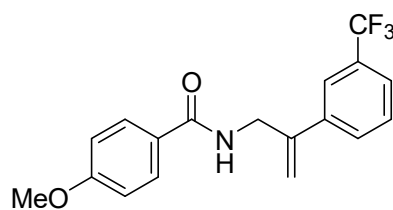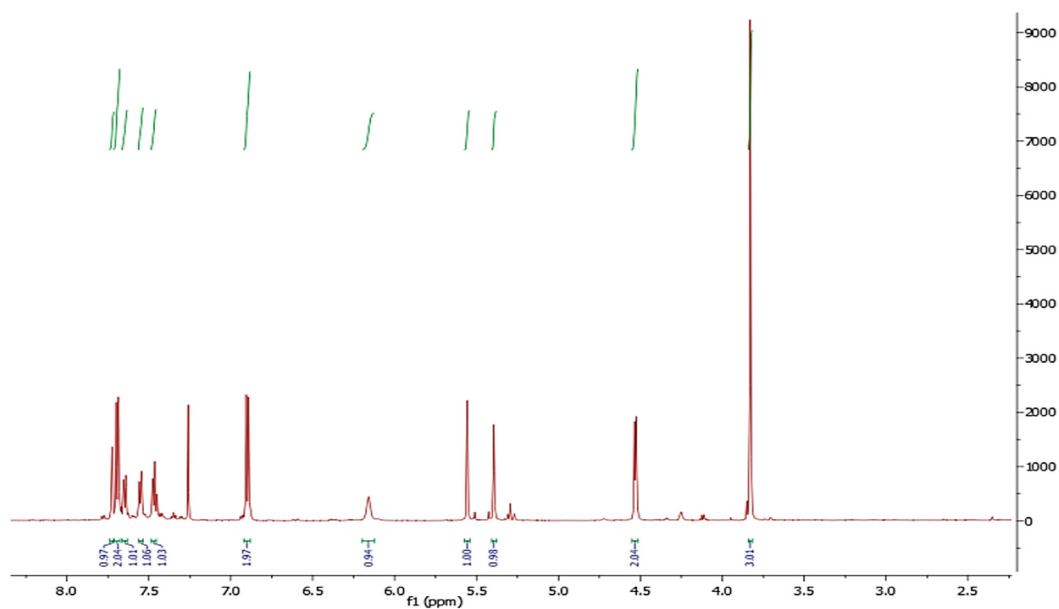

$^1\text{H}$  NMR (600 MHz,  $\text{CDCl}_3$ )  $\delta$  7.72 (s, 1H), 7.69 (d,  $J$  = 8.8 Hz, 2H), 7.65 (d,  $J$  = 7.9 Hz, 1H), 7.55 (d,  $J$  = 7.7 Hz, 1H), 7.47 (d,  $J$  = 7.8 Hz, 1H), 6.90 (d,  $J$  = 8.8 Hz, 2H), 6.16 (s, 1H), 5.56 (s, 1H), 5.39 (s, 1H), 4.53 (d,  $J$  = 5.8 Hz, 2H), 3.83 (s, 3H)

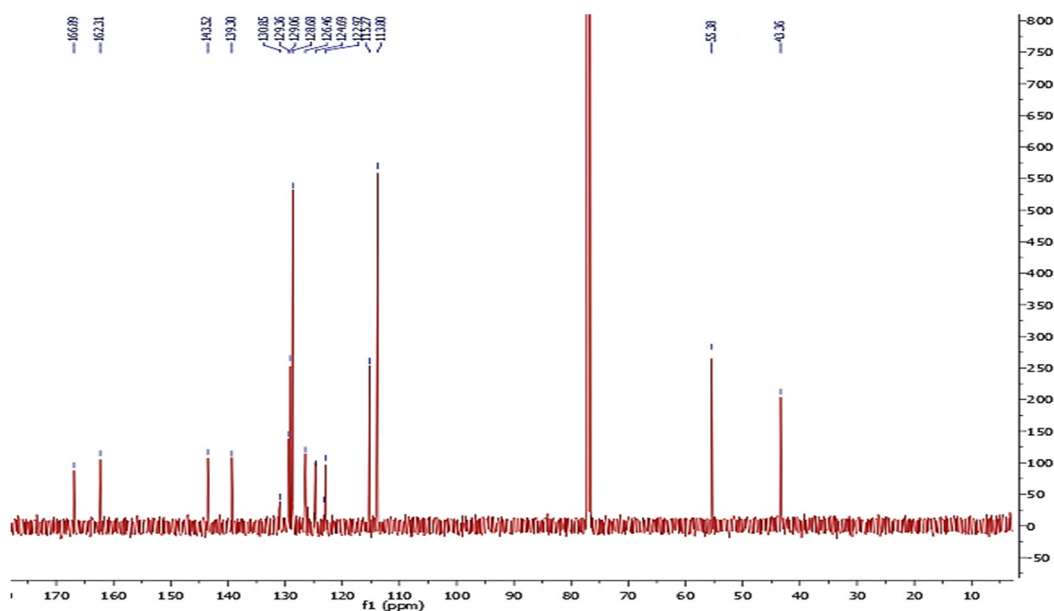

$^{13}\text{C}$  NMR (151 MHz,  $\text{CDCl}_3$ )  $\delta$  166.89, 162.31, 143.52, 139.30, 130.85 (q,  $J$  = 31.7 Hz), 129.36, 129.06, 128.68, 126.46, 124.69 (q,  $J$  = 4.53 Hz), 123.13 (q,  $J$  = 271.8 Hz), 122.97 (q,  $J$  = 4.53 Hz), 115.27, 113.80, 55.38, 43.36

**4-methyl-N-(2-(3-(trifluoromethyl)phenyl)allyl)benzamide (6b)**

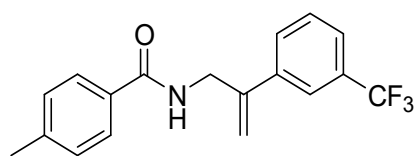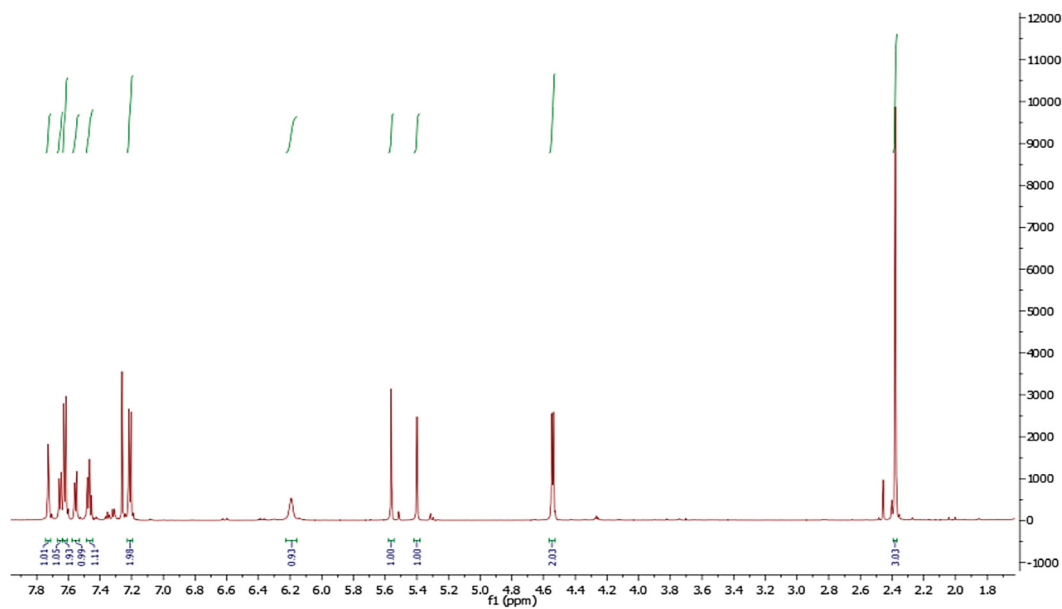

$^1\text{H}$  NMR (600 MHz,  $\text{CDCl}_3$ )  $\delta$  7.73 (s, 1H), 7.65 (d,  $J$  = 7.8 Hz, 1H), 7.62 (d,  $J$  = 8.1 Hz, 2H), 7.55 (d,  $J$  = 7.7 Hz, 1H), 7.47 (t,  $J$  = 7.8 Hz, 1H), 7.21 (d,  $J$  = 8.0 Hz, 2H), 6.19 (s, 1H), 5.56 (s, 1H), 5.40 (s, 1H), 4.54 (d,  $J$  = 5.8 Hz, 2H), 2.38 (s, 3H)

***N***-(2-(3-(trifluoromethyl)phenyl)allyl)benzamide (**6c**)

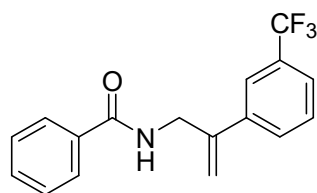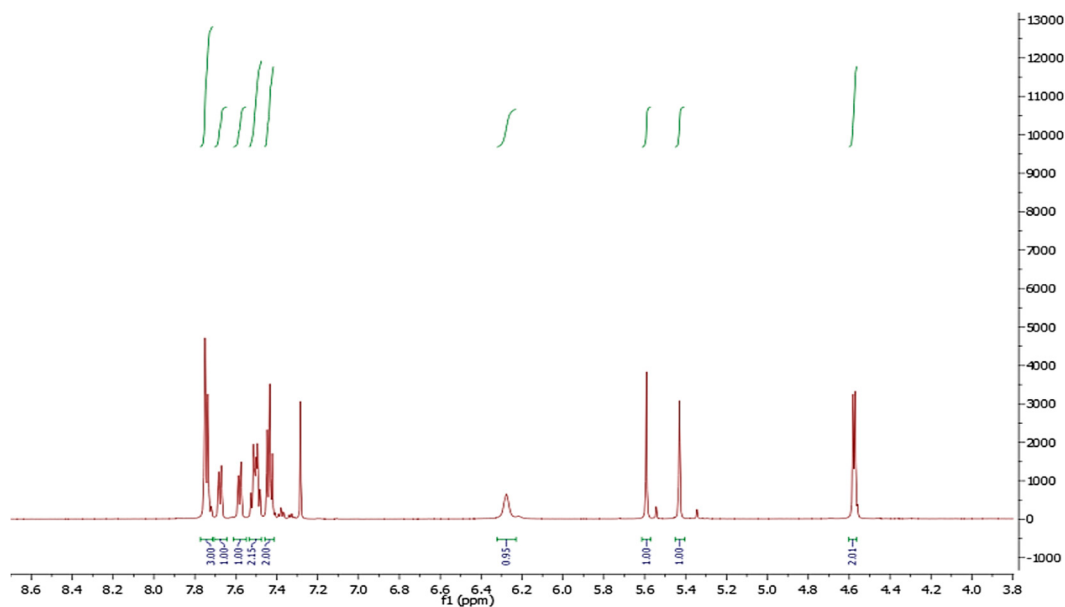

$^1\text{H}$  NMR (600 MHz,  $\text{CDCl}_3$ )  $\delta$  7.74 (d,  $J$  = 8.0 Hz, 3H), 7.68 (d,  $J$  = 7.8 Hz, 1H), 7.58 (d,  $J$  = 7.7 Hz, 1H), 7.53 – 7.47 (m, 2H), 7.43 (t,  $J$  = 7.7 Hz, 2H), 6.28 (s,  $J$  = 31.2 Hz, 1H), 5.59 (s, 1H), 5.43 (s, 1H), 4.58 (d,  $J$  = 5.8 Hz, 2H)

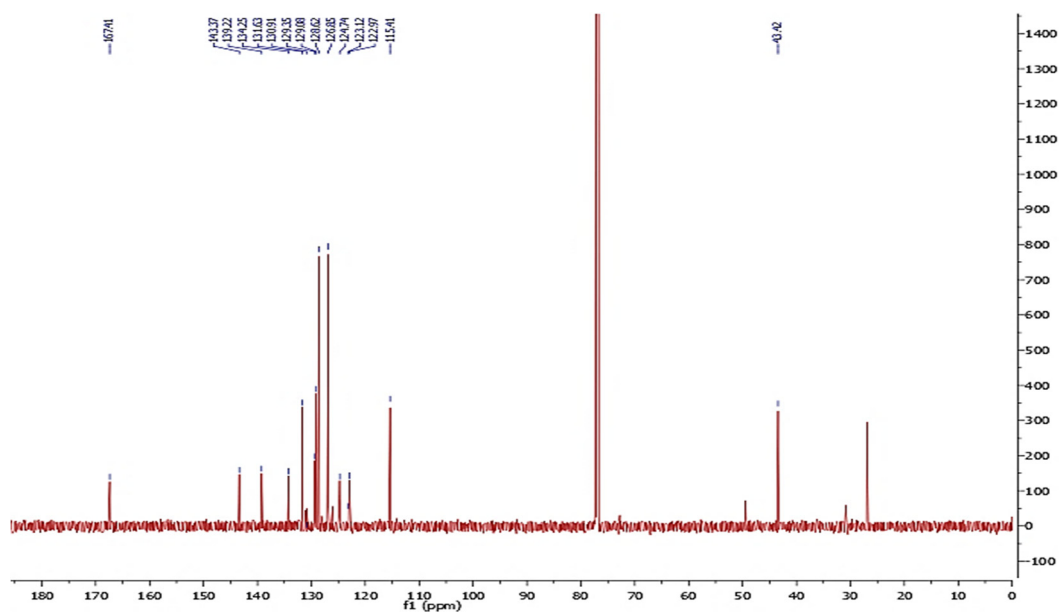

$^{13}\text{C}$  NMR (151 MHz,  $\text{CDCl}_3$ )  $\delta$  167.41, 143.37, 139.22, 134.25, 131.63, 130.91 (q,  $J$  = 33.22 Hz), 129.35, 129.08, 128.62, 126.85, 124.74 (q,  $J$  = 4.53 Hz), 123.12 (q,  $J$  = 270.3 Hz), 122.97 (q,  $J$  = 4.53 Hz), 115.41, 43.42

**4-fluoro-N-(2-(3-(trifluoromethyl)phenyl)allyl)benzamide (6d)**

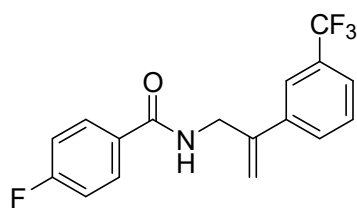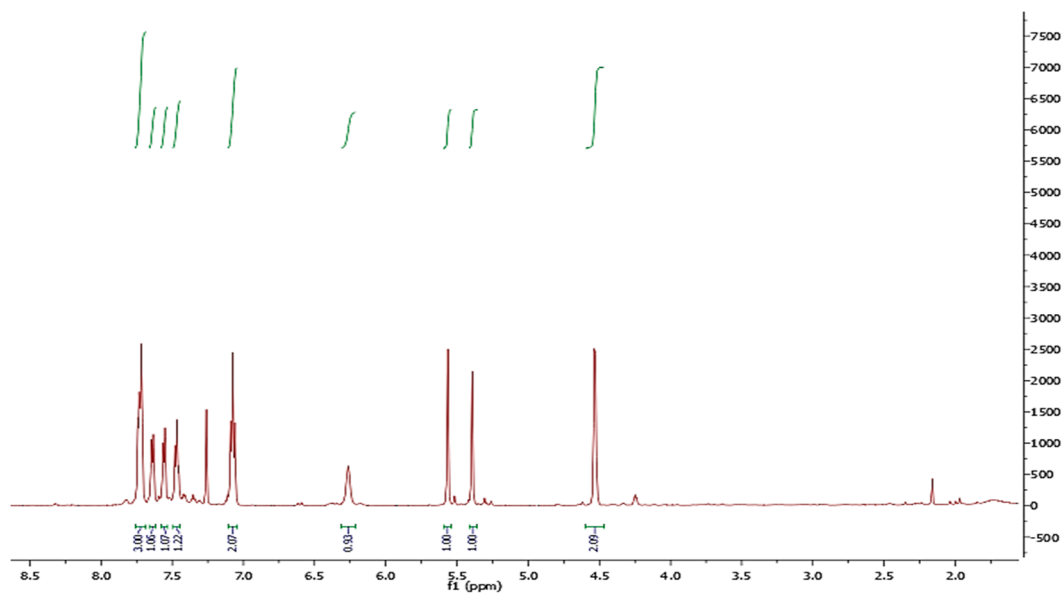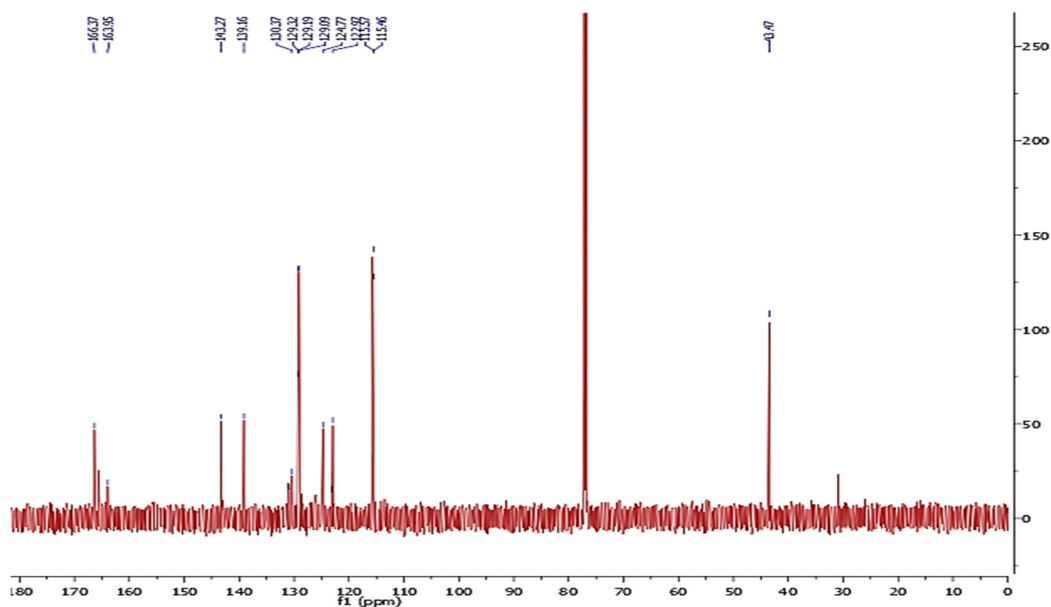

**4-bromo-N-(2-(3-(trifluoromethyl)phenyl)allyl)benzamide (6e)**

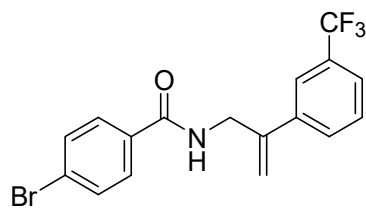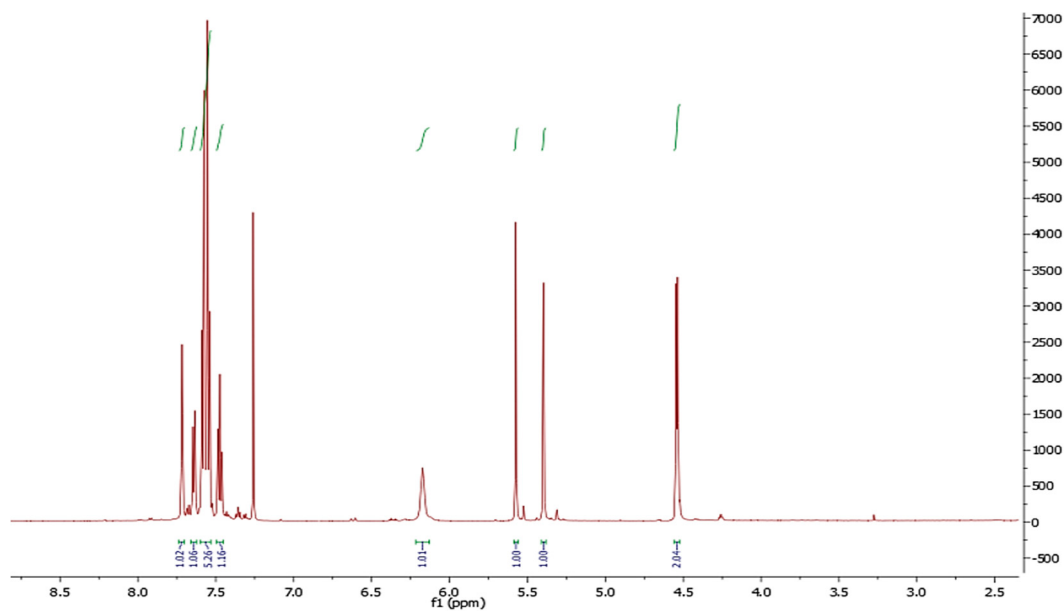

$^1\text{H}$  NMR (600 MHz,  $\text{CDCl}_3$ )  $\delta$  7.72 (s, 1H), 7.64 (d,  $J$  = 7.8 Hz, 1H), 7.60 – 7.53 (m, 5H), 7.47 (t,  $J$  = 7.8 Hz, 1H), 6.17 (s, 1H), 5.57 (s, 1H), 5.40 (s, 1H), 4.54 (d,  $J$  = 5.7 Hz, 2H)

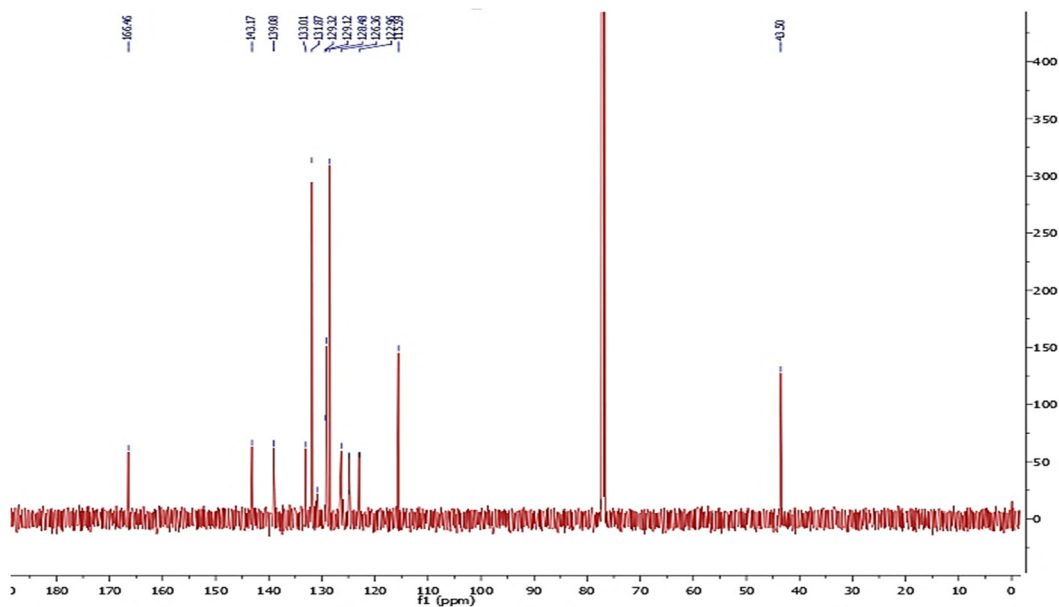

$^{13}\text{C}$  NMR (151 MHz,  $\text{CDCl}_3$ )  $\delta$  166.46, 143.17, 139.08, 133.01, 131.87, 130.93 (q,  $J$  = 33.22 Hz), 129.32, 129.12, 128.48, 126.36, 124.81 (q,  $J$  = 4.53 Hz), 123.08 (q,  $J$  = 272.3 Hz), 122.96 (q,  $J$  = 4.53 Hz), 115.59, 43.50

**4-(trifluoromethyl)-N-(2-(3-(trifluoromethyl)phenyl)allyl)benzamide (6f)**

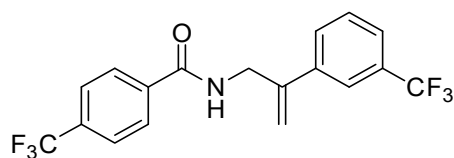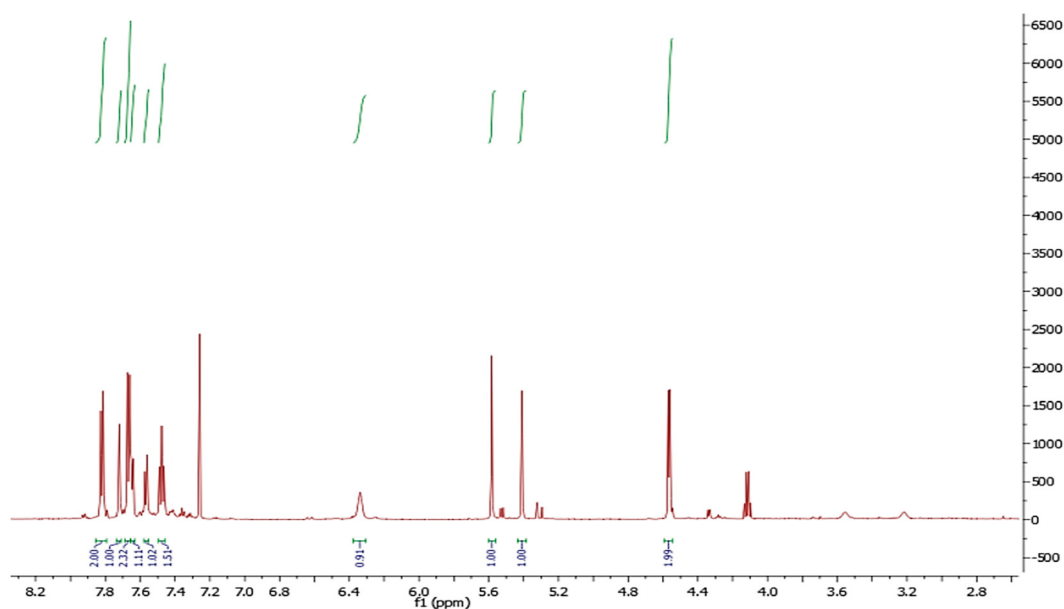

$^1\text{H}$  NMR (600 MHz,  $\text{CDCl}_3$ )  $\delta$  7.82 (d,  $J$  = 8.1 Hz, 2H), 7.72 (s, 1H), 7.67 (d,  $J$  = 8.2 Hz, 2H), 7.65 (d,  $J$  = 7.6 Hz, 1H), 7.57 (d,  $J$  = 7.7 Hz, 1H), 7.48 (t,  $J$  = 7.9 Hz, 1H), 6.34 (s,  $J$  = 20.3 Hz, 1H), 5.58 (s, 12H), 5.41 (s, 1H), 4.57 (d,  $J$  = 5.8 Hz, 2H)

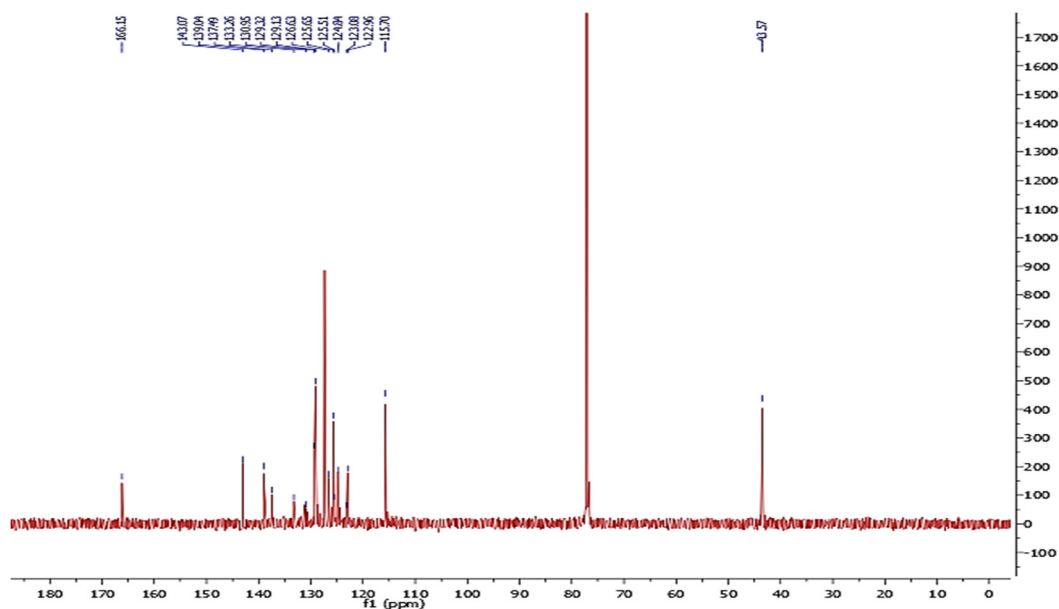

$^{13}\text{C}$  NMR (151 MHz,  $\text{CDCl}_3$ )  $\delta$  166.15, 143.07, 139.04, 137.49, 133.26 (q,  $J$  = 31.71 Hz), 130.95 (q,  $J$  = 33.22 Hz), 129.32, 129.13, 127.37, 126.63 (q,  $J$  = 270.3 Hz), 125.65 (q,  $J$  = 4.53 Hz), 124.84 (q,  $J$  = 3.02 Hz), 123.08 (q,  $J$  = 271.2 Hz), 122.96 (q,  $J$  = 4.53 Hz), 115.70, 43.57

**4-nitro-N-(2-(3-(trifluoromethyl)phenyl)allyl)benzamide (6g)**

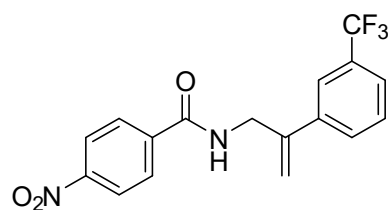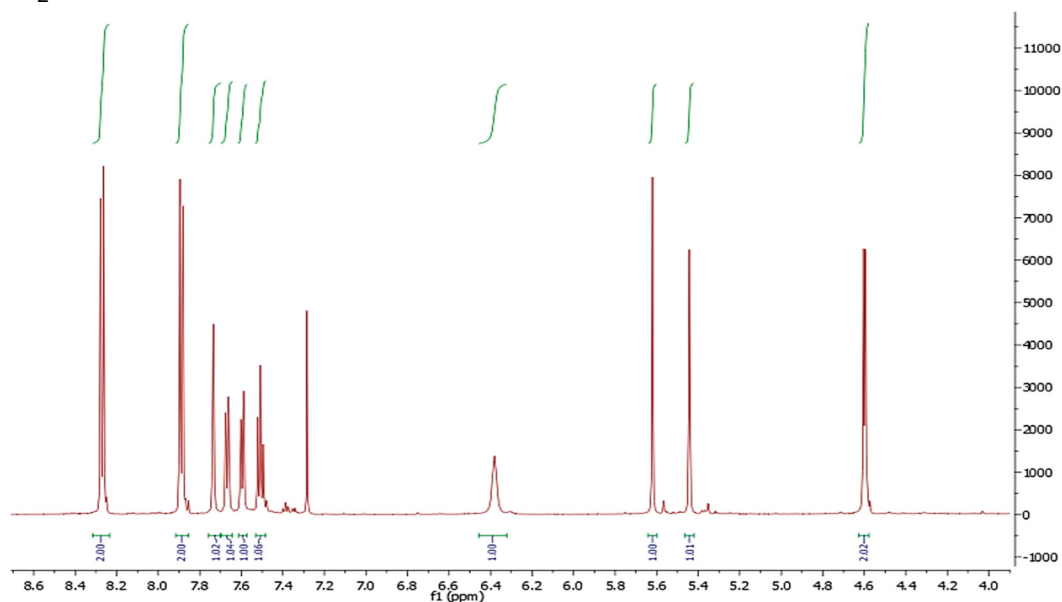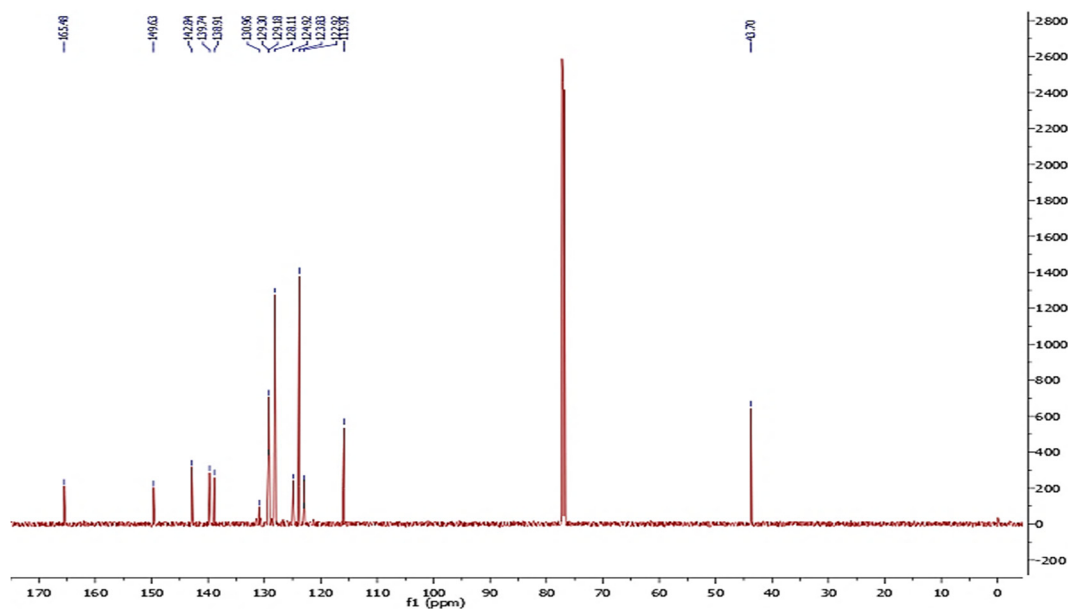

**N-(2-phenylallyl)benzamide (6h)**

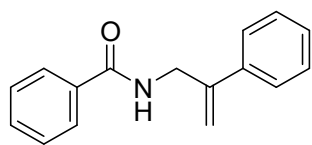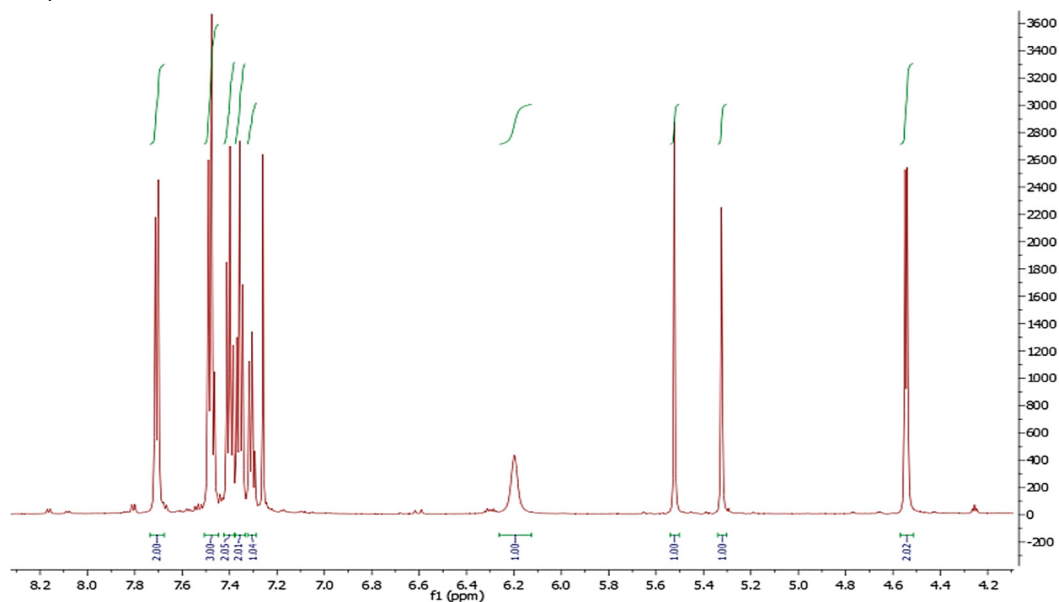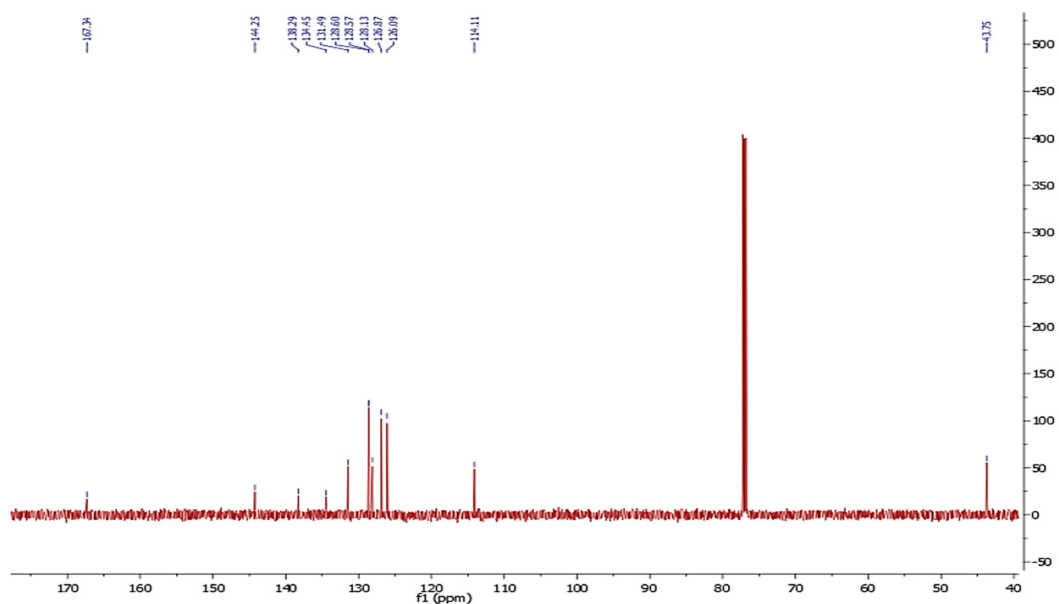

**N-(2-(4-fluorophenyl)allyl)benzamide (6i)**

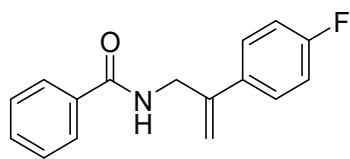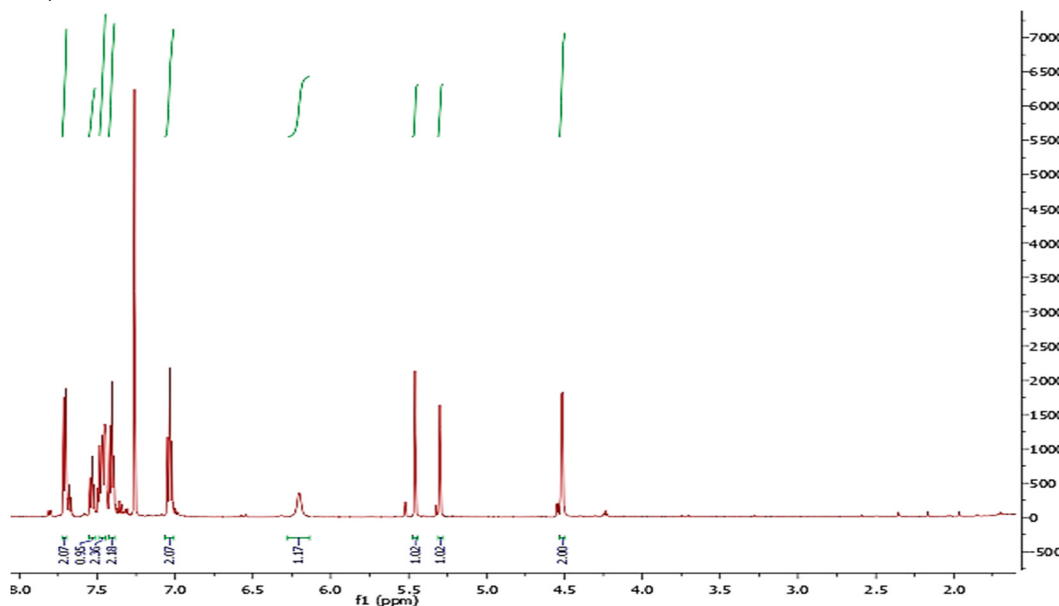

$^1\text{H}$  NMR (600 MHz,  $\text{CDCl}_3$ )  $\delta$  7.73 – 7.70 (m, 2H), 7.53 (t,  $J$  = 7.8 Hz, 1H), 7.48 – 7.45 (m, 2H), 7.41 (t,  $J$  = 7.6 Hz, 2H), 7.06 – 7.01 (m, 2H), 6.28 – 6.14 (m, 1H), 5.46 (s, 1H), 5.30 (s, 1H), 4.52 (d,  $J$  = 5.7 Hz, 2H)

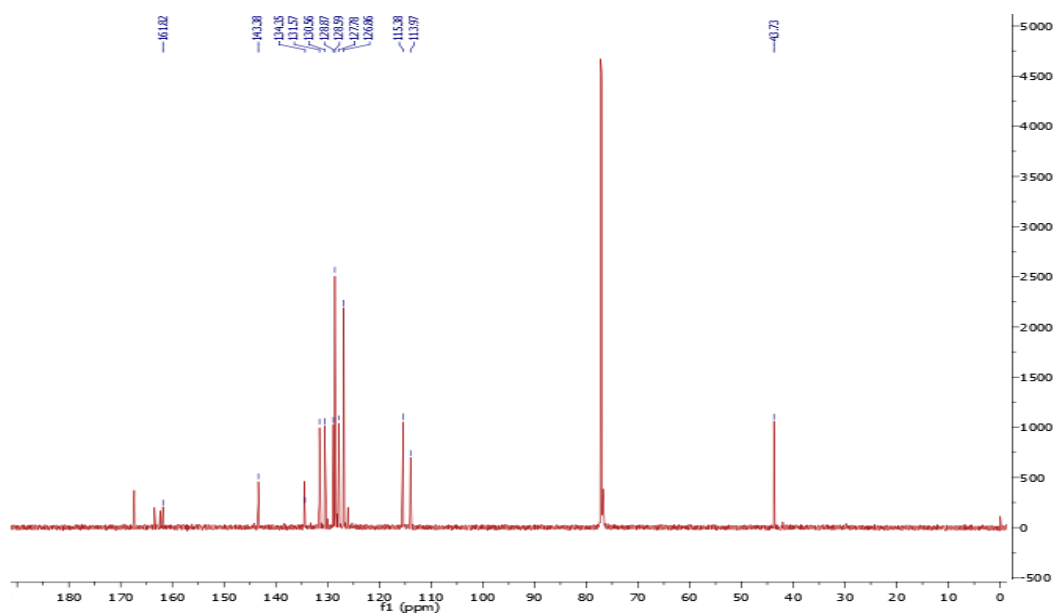

$^{13}\text{C}$  NMR (151 MHz,  $\text{CDCl}_3$ )  $\delta$  161.82 (d,  $J$  = 241.6 Hz), 143.38 (d,  $J$  = 4.53 Hz), 134.35, 131.57, 130.56, 128.87, 128.59, 127.78 (d,  $J$  = 7.55 Hz), 126.86, 115.38 (d,  $J$  = 21.14 Hz), 113.97, 43.73

**4-(3-benzamidoprop-1-en-2-yl)-*N*-isobutylbenzamide (6j)**

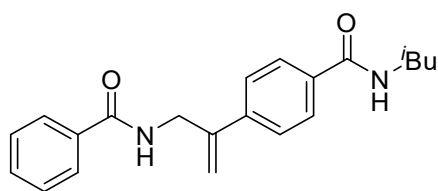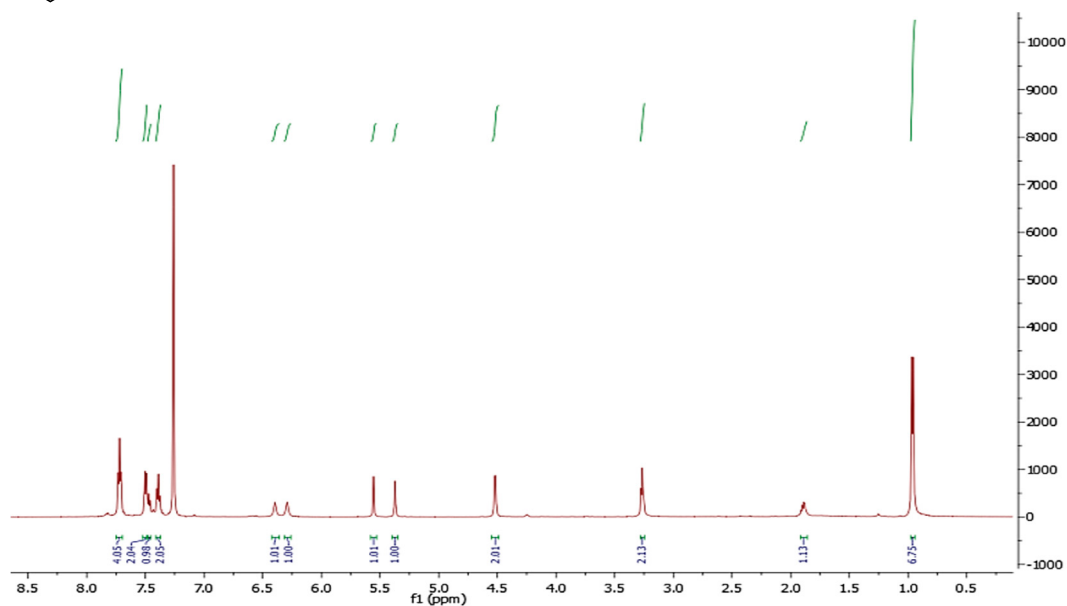

$^1\text{H}$  NMR (600 MHz,  $\text{CDCl}_3$ )  $\delta$  7.72 (t,  $J$  = 7.1 Hz, 4H), 7.50 (d,  $J$  = 8.1 Hz, 2H), 7.47 (d,  $J$  = 7.3 Hz, 1H), 7.39 (t,  $J$  = 7.5 Hz, 2H), 6.40 (s, 1H), 6.29 (s, 1H), 5.56 (s, 1H), 5.37 (s, 1H), 4.52 (d,  $J$  = 5.4 Hz, 2H), 3.26 (t,  $J$  = 6.3 Hz, 2H), 1.89 (dt,  $J$  = 13.3, 6.6 Hz, 1H), 0.96 (d,  $J$  = 6.6 Hz, 7H)

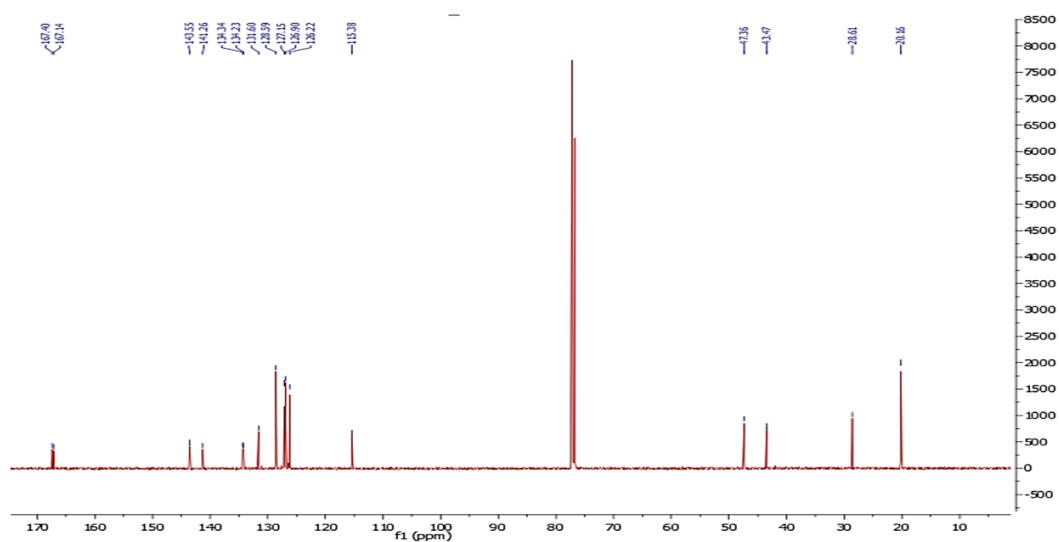

$^{13}\text{C}$  NMR (151 MHz,  $\text{CDCl}_3$ )  $\delta$  167.40, 167.14, 143.55, 141.26, 134.34, 134.23, 131.60, 128.59, 127.15, 126.90, 126.22, 115.38, 47.36, 43.47, 28.61, 20.16

**N-(2-(4-(trifluoromethyl)phenyl)allyl)benzamide (6k)**

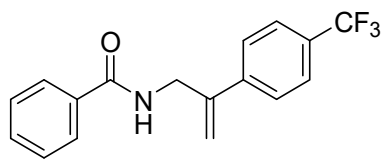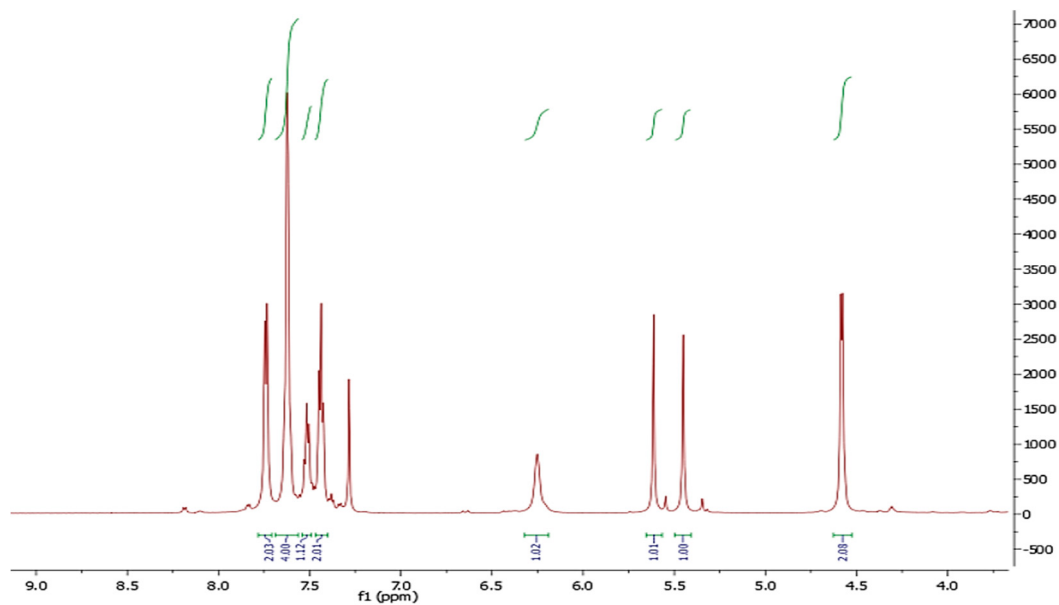

$^1\text{H}$  NMR (600 MHz,  $\text{CDCl}_3$ )  $\delta$  7.74 (d,  $J = 7.4$  Hz, 2H), 7.62 (d,  $J = 2.6$  Hz, 4H), 7.52 (t,  $J = 7.2$  Hz, 1H), 7.44 (t,  $J = 7.5$  Hz, 2H), 6.25 (s, 1H), 5.61 (s, 1H), 5.45 (s, 1H), 4.58 (d,  $J = 5.4$  Hz, 2H)

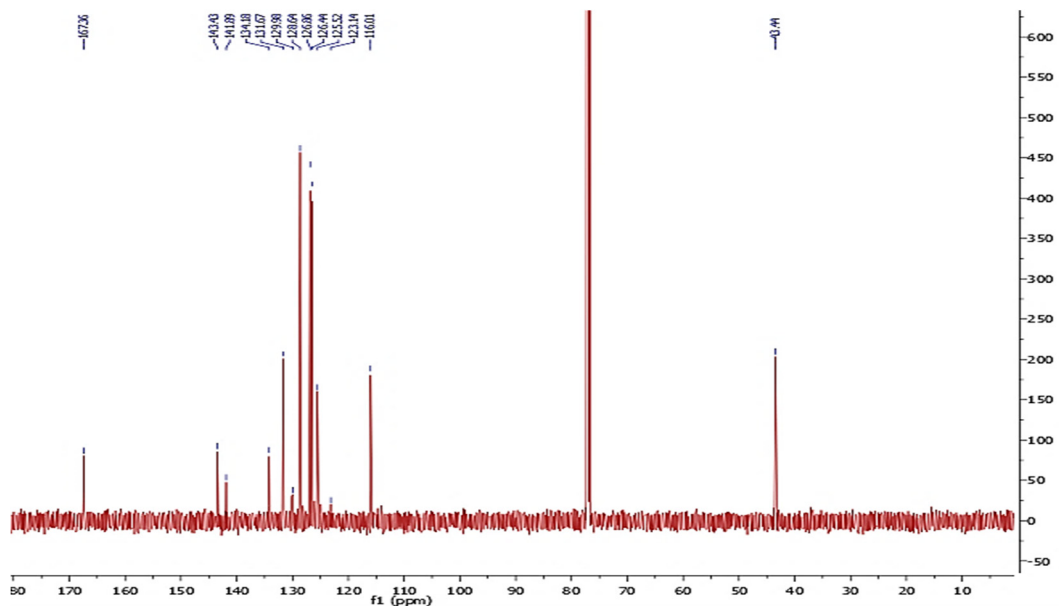

$^{13}\text{C}$  NMR (151 MHz,  $\text{CDCl}_3$ )  $\delta$  167.36, 143.43, 141.89, 134.18, 131.67, 129.98 (q,  $J = 31.71$  Hz), 128.64, 126.86, 126.44, 125.52 (q,  $J = 3.02$  Hz), 123.14 (q,  $J = 271.8$  Hz), 116.01, 43.44

**N-(2-(4-cyanophenyl)allyl)benzamide (6l)**

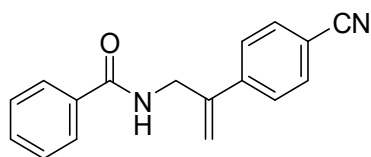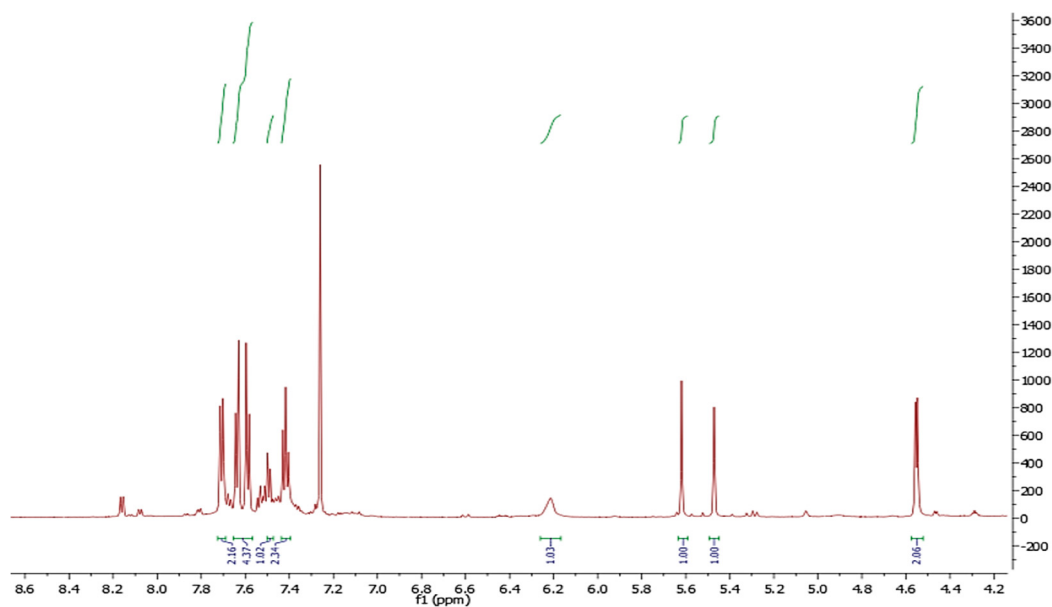

$^1\text{H}$  NMR (600 MHz,  $\text{CDCl}_3$ )  $\delta$  7.71 (d,  $J$  = 7.5 Hz, 2H), 7.61 (dd,  $J$  = 28.9, 8.3 Hz, 4H), 7.49 (d,  $J$  = 7.4 Hz, 1H), 7.42 (t,  $J$  = 7.7 Hz, 3H), 6.21 (s, 1H), 5.62 (s, 1H), 5.47 (s, 1H), 4.55 (d,  $J$  = 5.7 Hz, 2H)

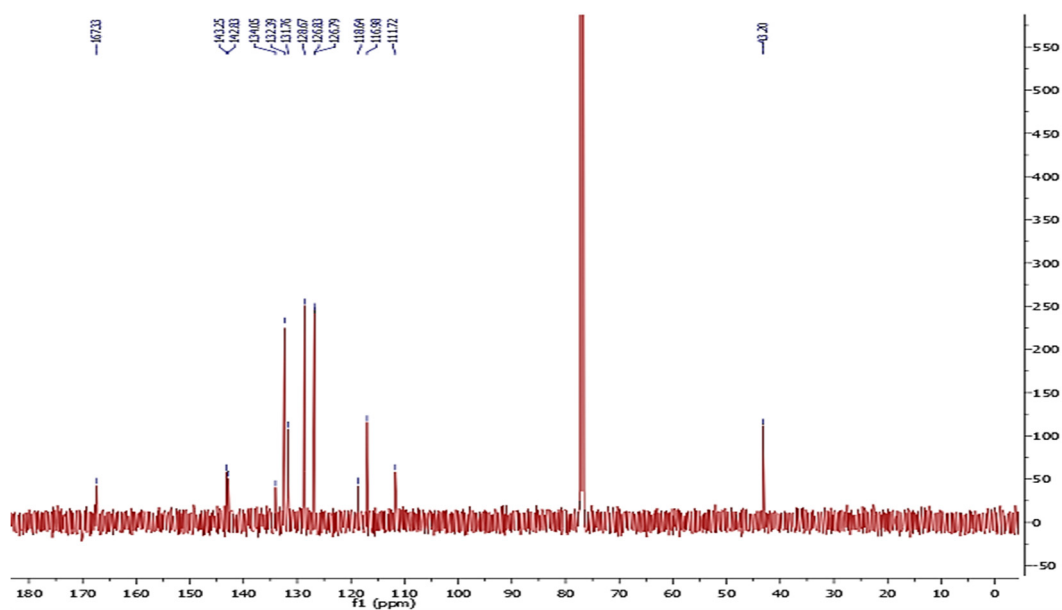

$^{13}\text{C}$  NMR (151 MHz,  $\text{CDCl}_3$ )  $\delta$  167.33, 143.25, 142.83, 134.05, 132.39, 131.76, 128.67, 126.83, 126.79, 118.64, 116.98, 111.72, 43.20

**N-(2-(3-cyanophenyl)allyl)benzamide (6n)**

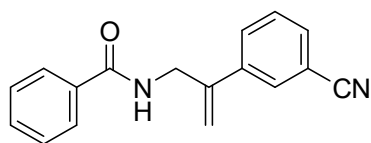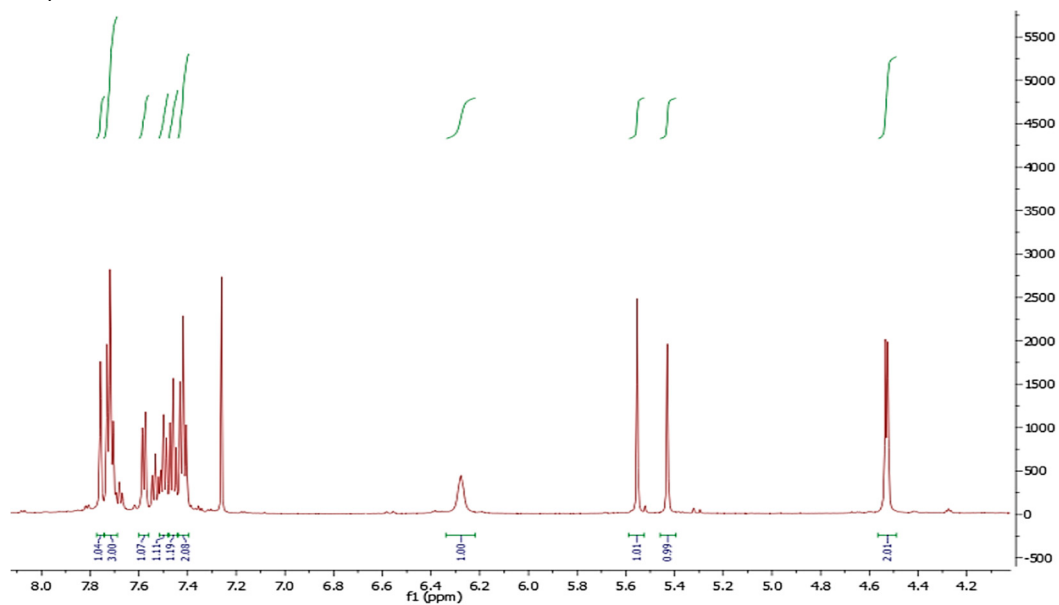

$^1\text{H}$  NMR (600 MHz,  $\text{CDCl}_3$ )  $\delta$  7.76 (s, 1H), 7.72 (t,  $J$  = 7.3 Hz, 3H), 7.58 (d,  $J$  = 7.7 Hz, 1H), 7.50 (t,  $J$  = 7.4 Hz, 1H), 7.46 (t,  $J$  = 7.8 Hz, 1H), 7.42 (t,  $J$  = 7.7 Hz, 2H), 6.28 (s, 1H), 5.55 (s, 1H), 5.43 (s, 1H), 4.53 (d,  $J$  = 5.8 Hz, 2H)

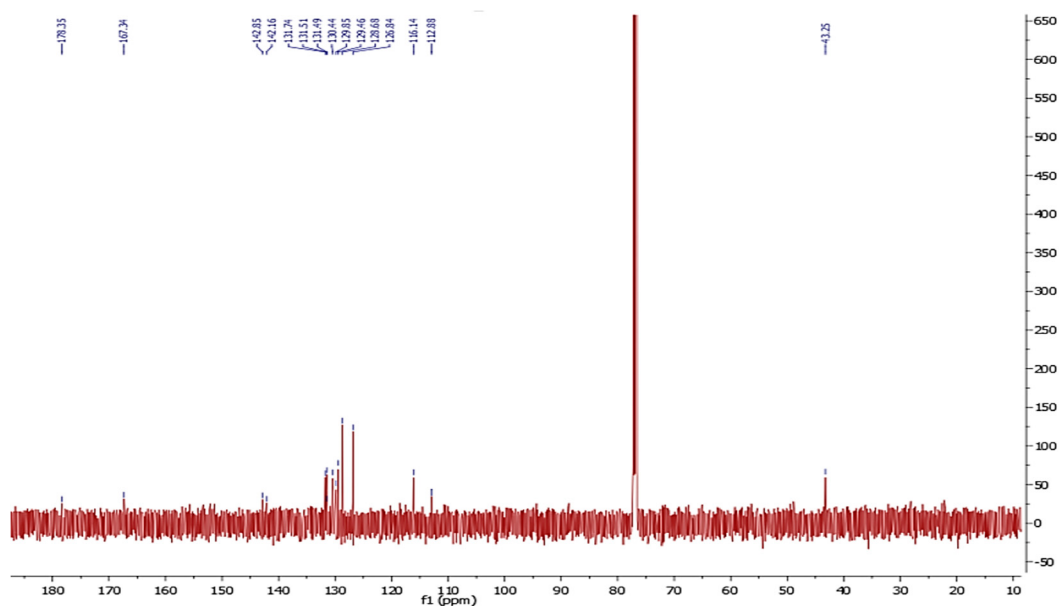

$^{13}\text{C}$  NMR (151 MHz,  $\text{CDCl}_3$ )  $\delta$  178.35, 167.34, 142.85, 142.16, 131.74, 131.51, 131.49, 130.44, 129.85, 129.46, 128.68, 126.84, 116.14, 112.88, 43.25

***N*-(2-(4-(morpholinofonyl)phenyl)allyl)benzamide (6o)**

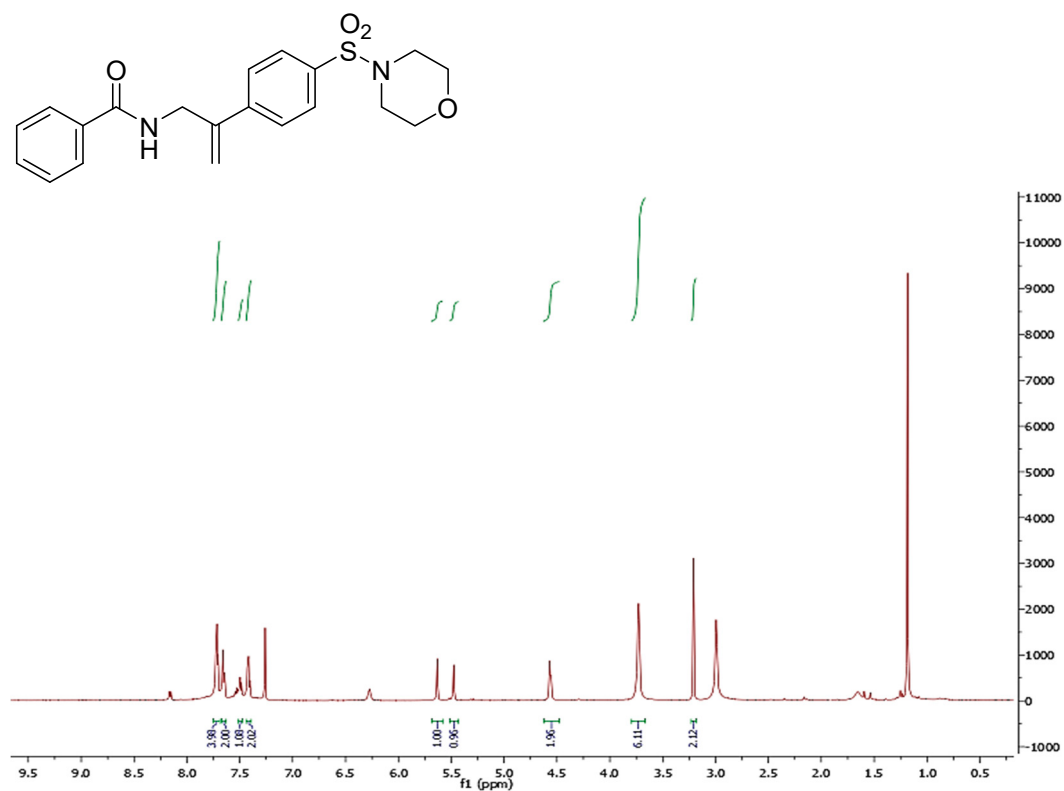

<sup>1</sup>H NMR (600 MHz, CDCl<sub>3</sub>)  $\delta$  7.72 (t, *J* = 6.8 Hz, 4H), 7.65 (d, *J* = 8.2 Hz, 2H), 7.51 – 7.48 (m, 1H), 7.42 (t, *J* = 7.6 Hz, 2H), 5.63 (s, 1H), 5.48 (s, 1H), 4.56 (d, *J* = 5.6 Hz, 2H), 3.79 – 3.67 (m, 6H), 3.21 (s, 2H)

**N-(2-(pyridin-3-yl)allyl)benzamide (6q)**

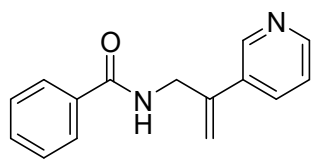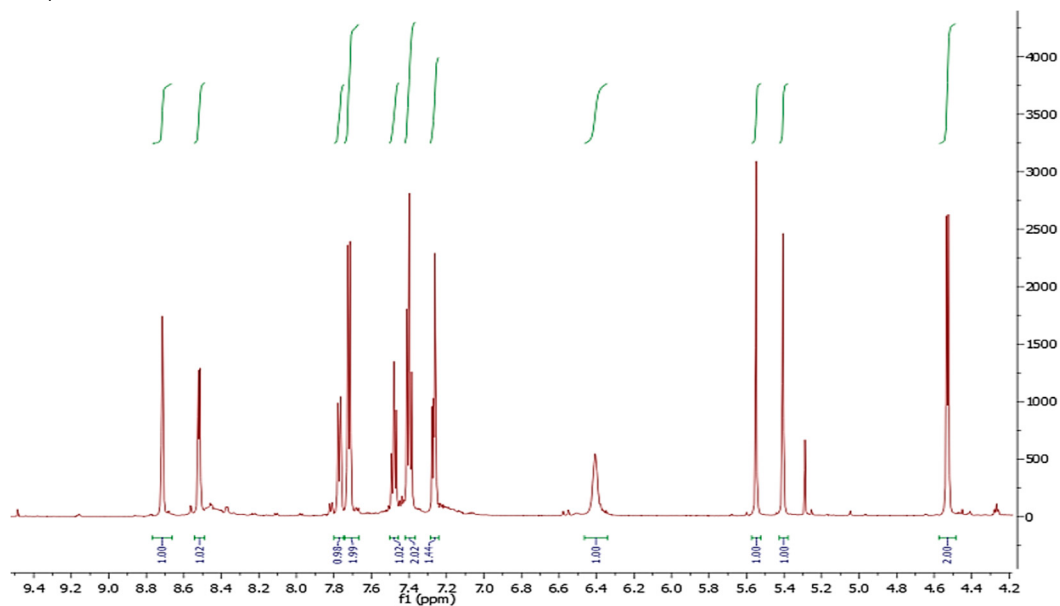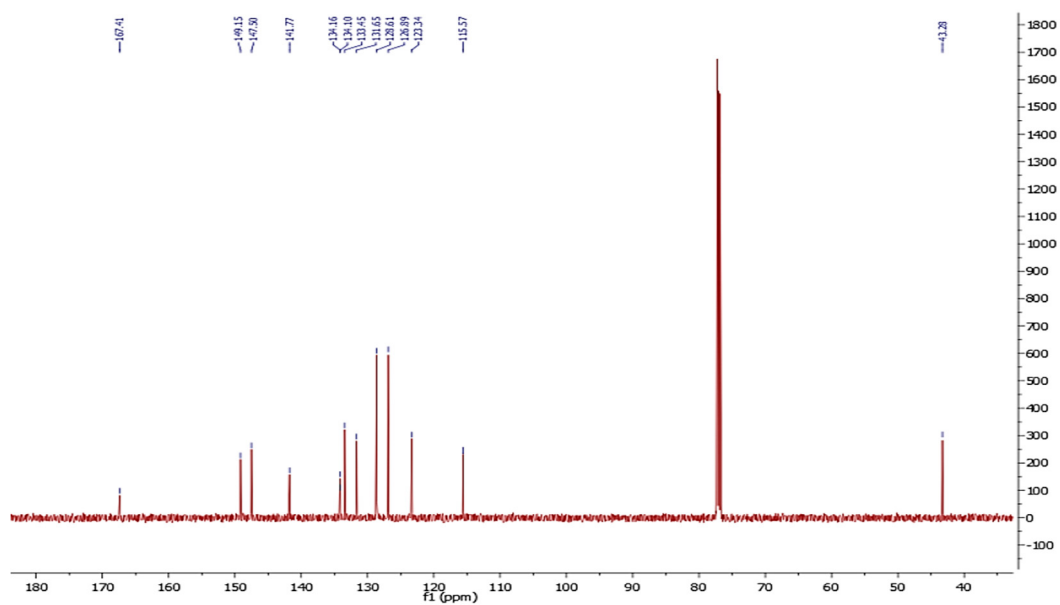

**N-(2-(naphthalen-1-yl)allyl)benzamide (6p)**

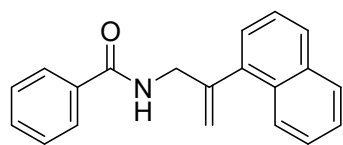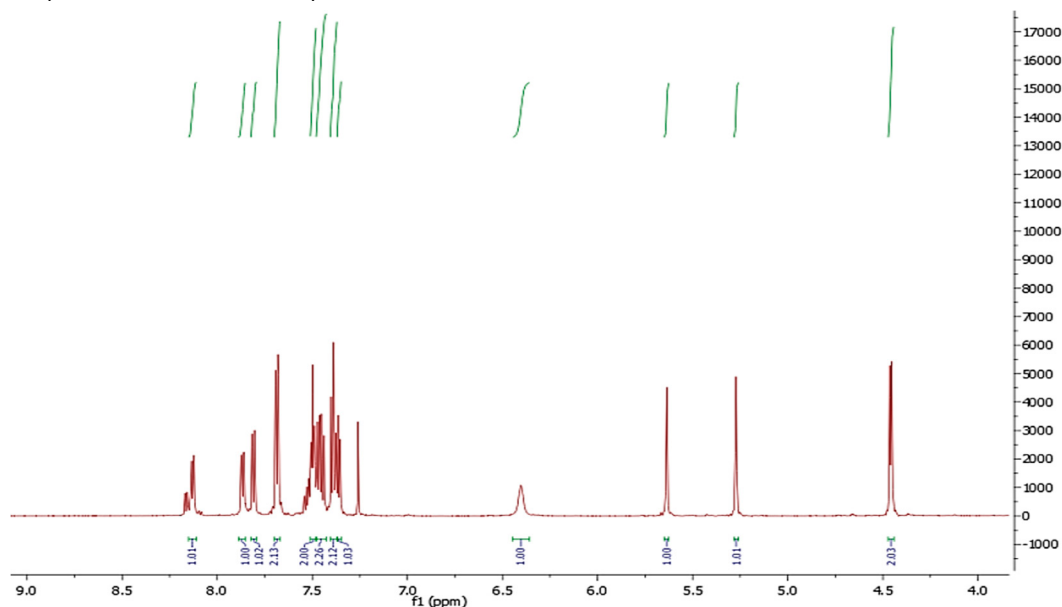

$^1\text{H}$  NMR (600 MHz,  $\text{CDCl}_3$ )  $\delta$  8.14 – 8.11 (m, 1H), 7.88 – 7.85 (m, 1H), 7.81 (d,  $J$  = 8.2 Hz, 1H), 7.70 – 7.67 (m, 2H), 7.50 (ddd,  $J$  = 8.0, 3.5, 1.6 Hz, 2H), 7.48 – 7.43 (m, 2H), 7.39 (t,  $J$  = 7.7 Hz, 2H), 7.36 (dd,  $J$  = 6.9, 1.0 Hz, 1H), 6.40 (s, 1H), 5.64 (d,  $J$  = 1.4 Hz, 1H), 5.27 (d,  $J$  = 1.1 Hz, 1H), 4.46 (d,  $J$  = 5.9 Hz, 2H)

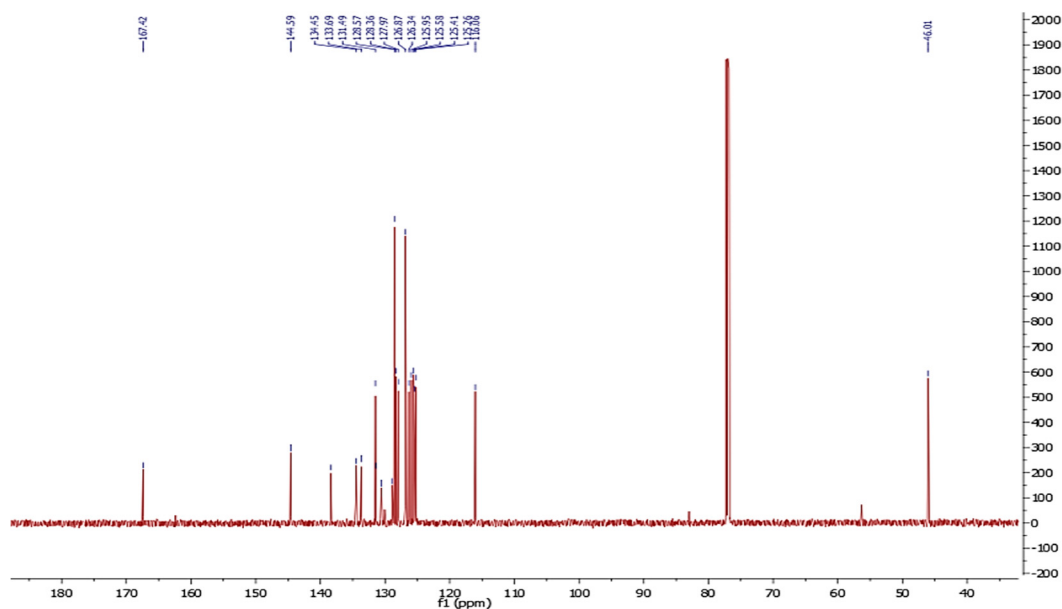

$^{13}\text{C}$  NMR (151 MHz,  $\text{CDCl}_3$ )  $\delta$  167.42, 144.59, 138.38, 134.45, 133.69, 131.49, 131.44, 130.57, 128.88, 128.57, 128.36, 127.97, 126.87, 126.34, 125.95, 125.58, 125.41, 125.26, 116.06, 46.01

**N-(2-(quinolin-6-yl)allyl)benzamide (6r)**

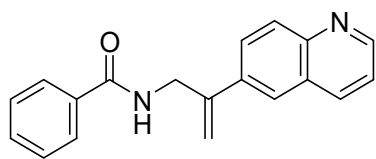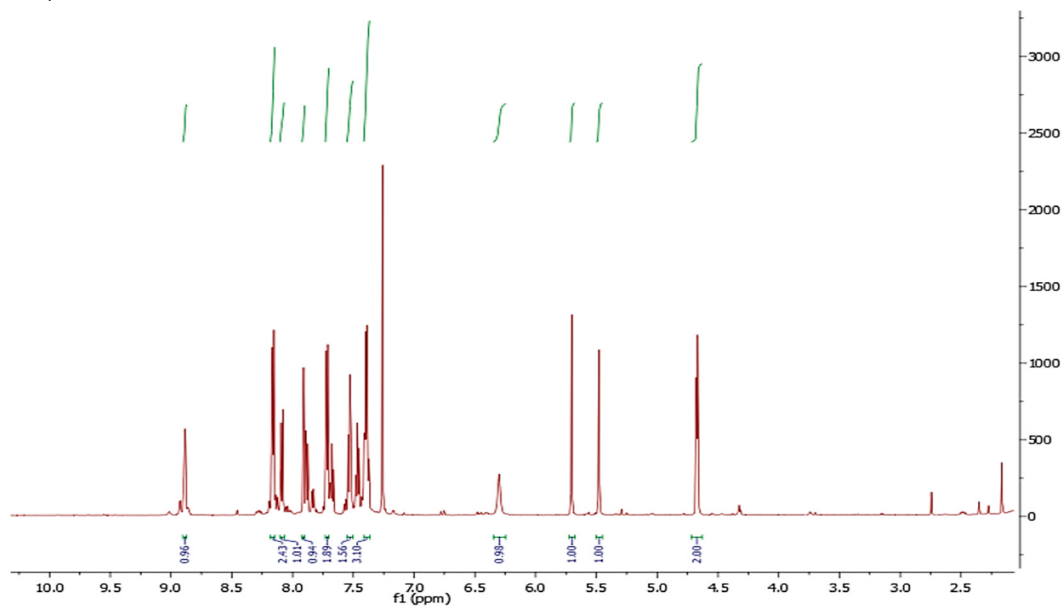

$^1\text{H}$  NMR (600 MHz,  $\text{CDCl}_3$ )  $\delta$  8.89 (d,  $J$  = 3.9 Hz, 1H), 8.16 (d,  $J$  = 7.7 Hz, 2H), 8.09 (d,  $J$  = 8.8 Hz, 1H), 7.91 (s, 1H), 7.72 (d,  $J$  = 7.8 Hz, 2H), 7.53 (t,  $J$  = 7.6 Hz, 1H), 7.41 – 7.37 (m, 3H), 6.30 (s, 1H), 5.70 (s, 1H), 5.48 (s, 1H), 4.67 (d,  $J$  = 5.6 Hz, 2H)

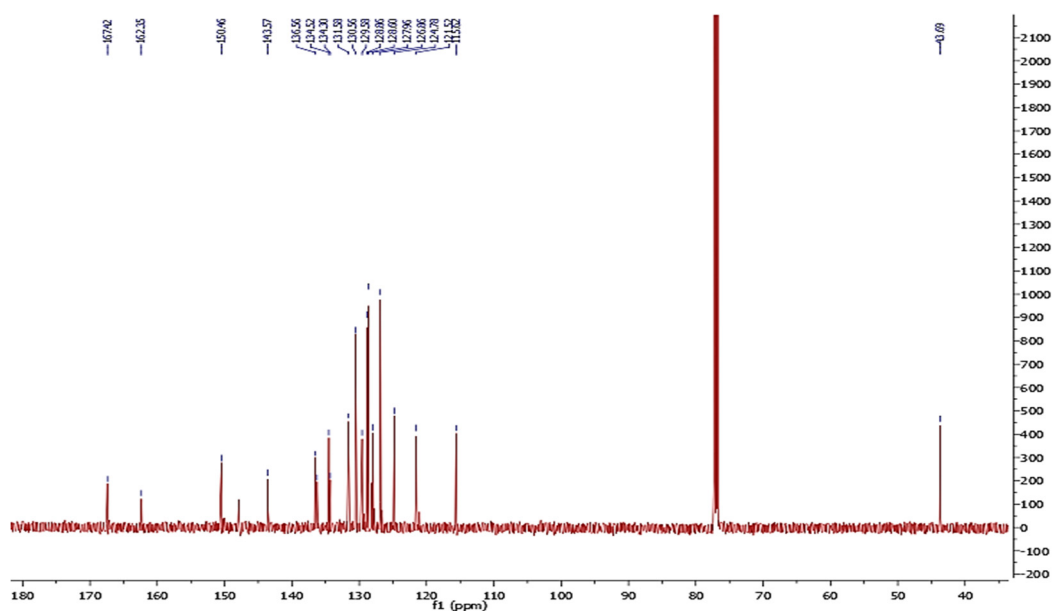

$^{13}\text{C}$  NMR (151 MHz,  $\text{CDCl}_3$ )  $\delta$  167.42, 162.35, 150.46, 143.57, 136.56, 136.25, 134.52, 134.30, 131.58, 130.56, 129.58, 128.86, 128.60, 127.96, 126.86, 124.78, 121.52, 115.62, 43.69

**4-methyl-N-(2-(quinolin-6-yl)allyl)benzamide (6s)**

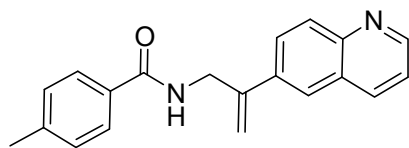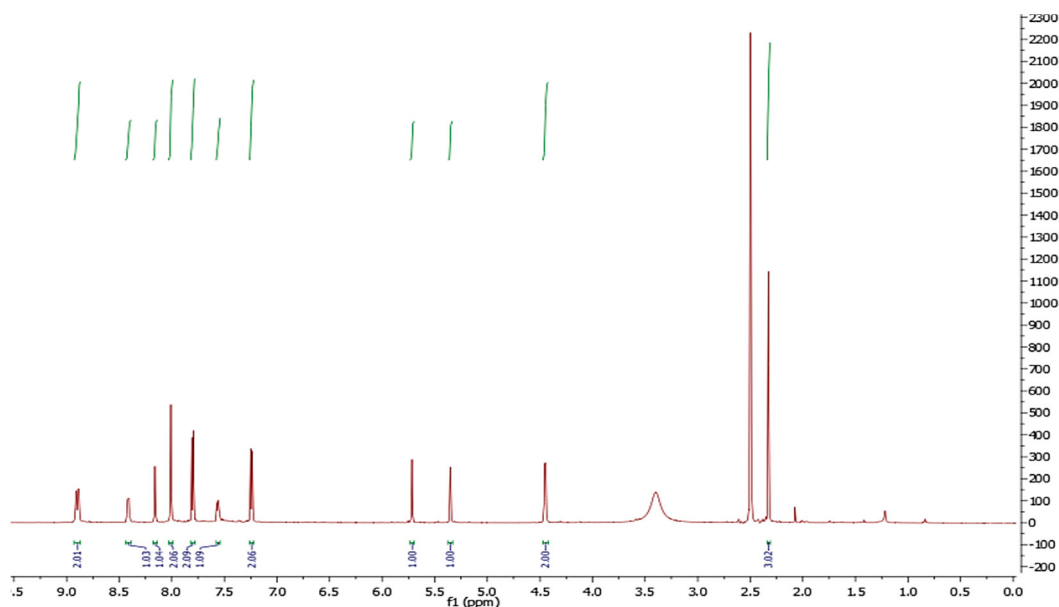

$^1\text{H}$  NMR (600 MHz, DMSO)  $\delta$  8.93 – 8.87 (m, 2H), 8.41 (d,  $J$  = 8.2 Hz, 1H), 8.16 (s, 1H), 8.01 (s, 2H), 7.80 (d,  $J$  = 8.2 Hz, 2H), 7.56 (dd,  $J$  = 8.2, 4.2 Hz, 1H), 7.24 (d,  $J$  = 8.0 Hz, 2H), 5.72 (s, 1H), 5.35 (s, 1H), 4.45 (d,  $J$  = 5.8 Hz, 2H), 2.33 (s, 3H)

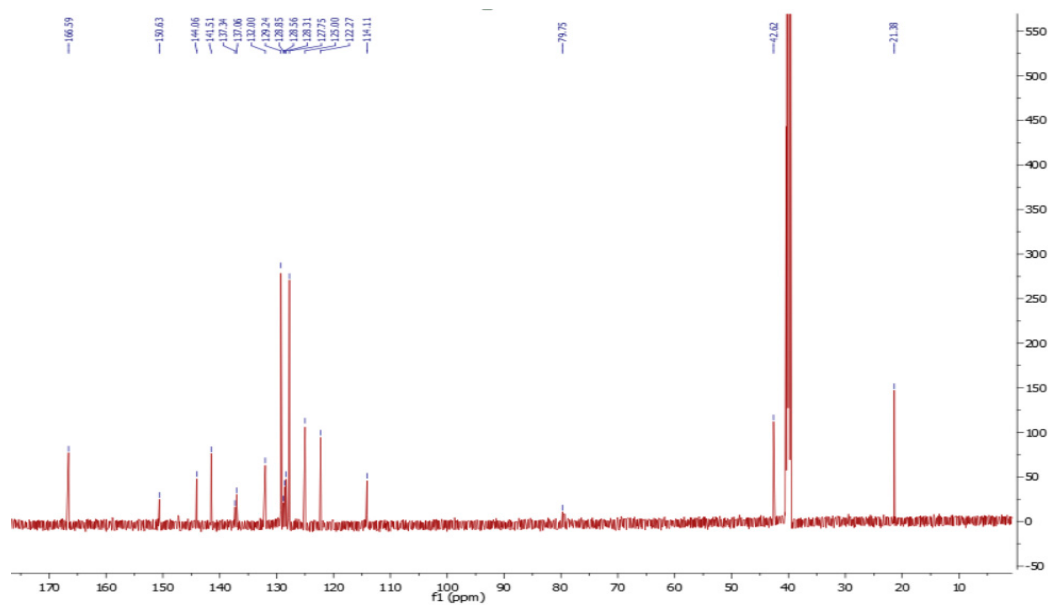

$^{13}\text{C}$  NMR (151 MHz, DMSO)  $\delta$  166.59, 150.63, 144.06, 141.51, 137.34, 137.06, 132.00, 129.24, 128.85, 128.56, 128.31, 127.75, 125.00, 122.27, 114.11, 79.75, 42.62, 21.38

**5-(chloromethyl)-2-(p-tolyl)-5-(3-(trifluoromethyl)phenyl)-4,5-dihydrooxazole (7b)**

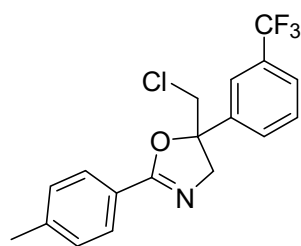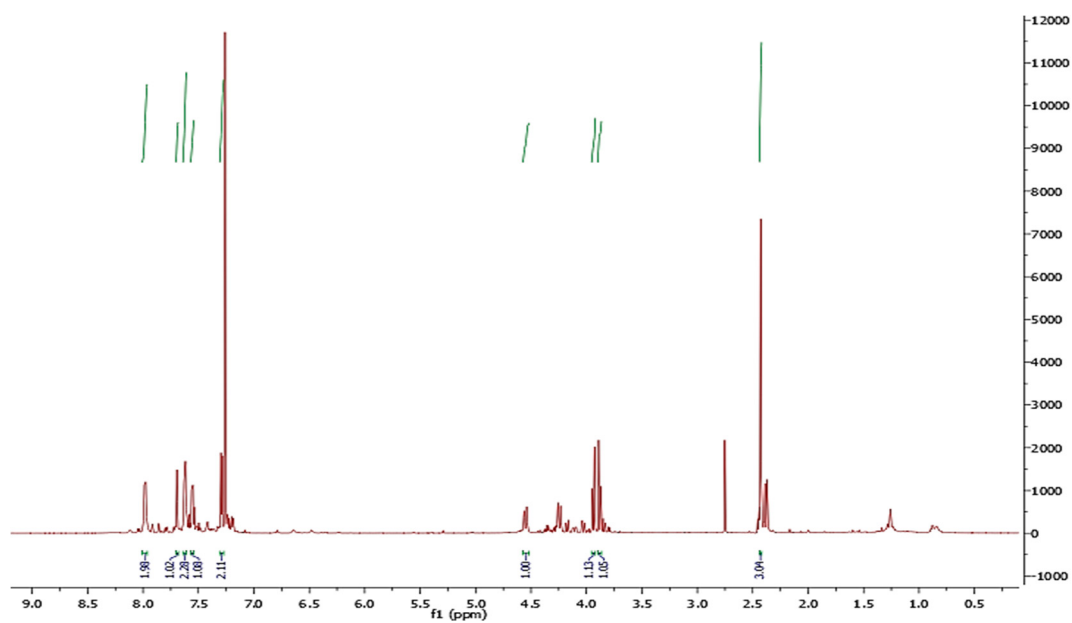

$^1\text{H}$  NMR (600 MHz,  $\text{CDCl}_3$ )  $\delta$  7.98 (d,  $J = 7.9$  Hz, 2H), 7.69 (s, 1H), 7.64 – 7.61 (m, 2H), 7.57 – 7.53 (m, 1H), 7.29 (d,  $J = 7.9$  Hz, 2H), 4.55 (d,  $J = 14.7$  Hz, 1H), 4.25 (d,  $J = 14.6$  Hz, 1H), 3.94 (d,  $J = 12.1$  Hz, 1H), 3.88 (d,  $J = 12.1$  Hz, 1H), 2.43 (s, 3H)

**5-(chloromethyl)-2-phenyl-5-(3-(trifluoromethyl)phenyl)-4,5-dihydrooxazole (7c)**

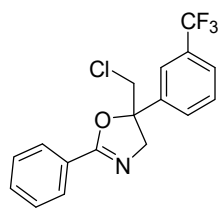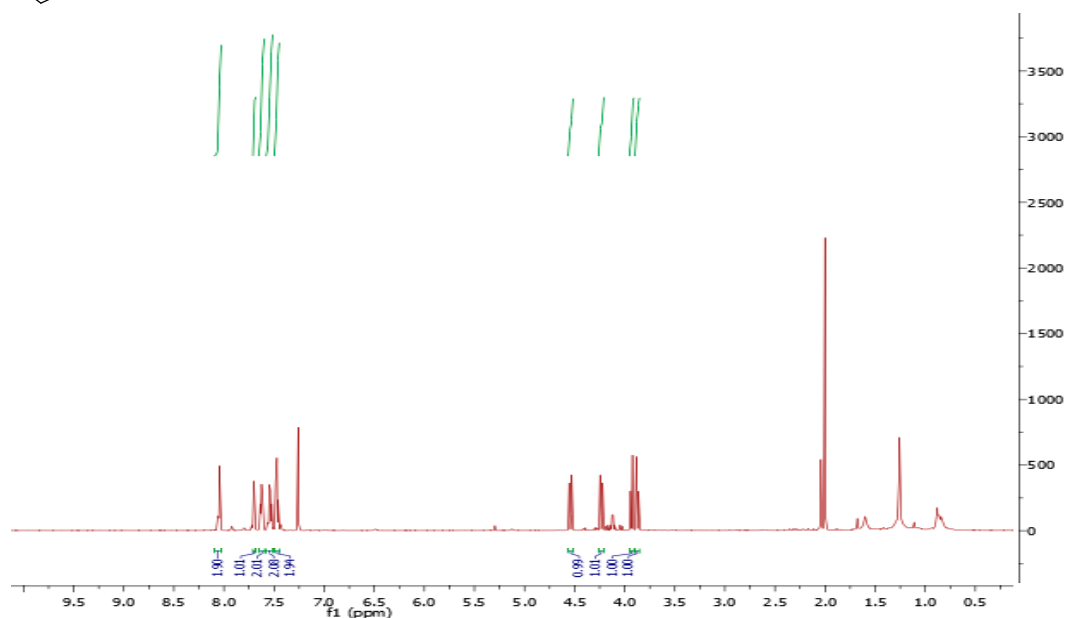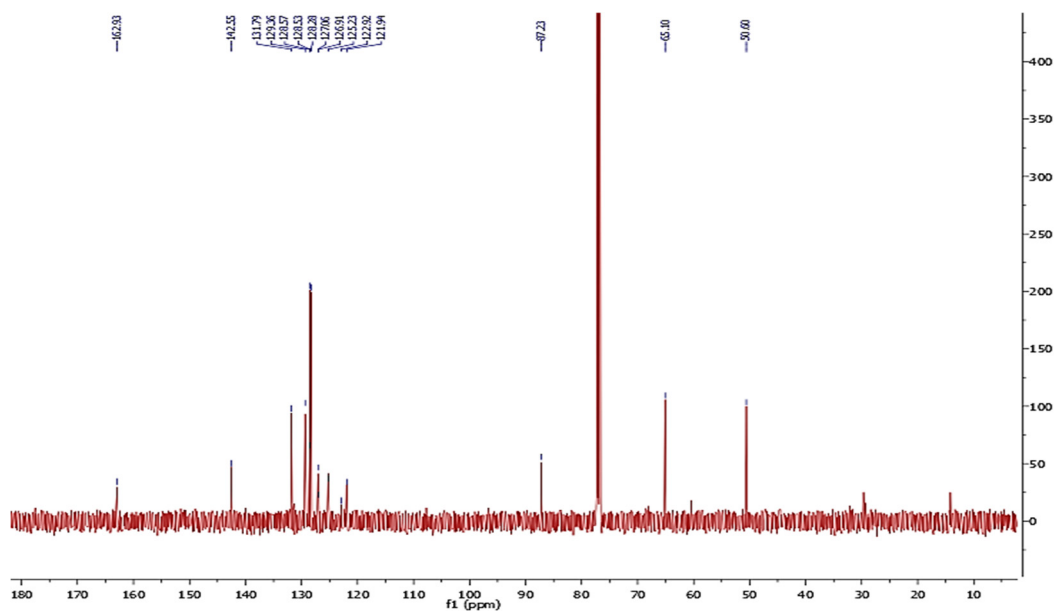

**5-(chloromethyl)-2-(4-fluorophenyl)-5-(3-(trifluoromethyl)phenyl)-4,5-dihydrooxazole (7d)**

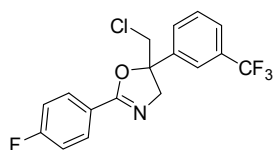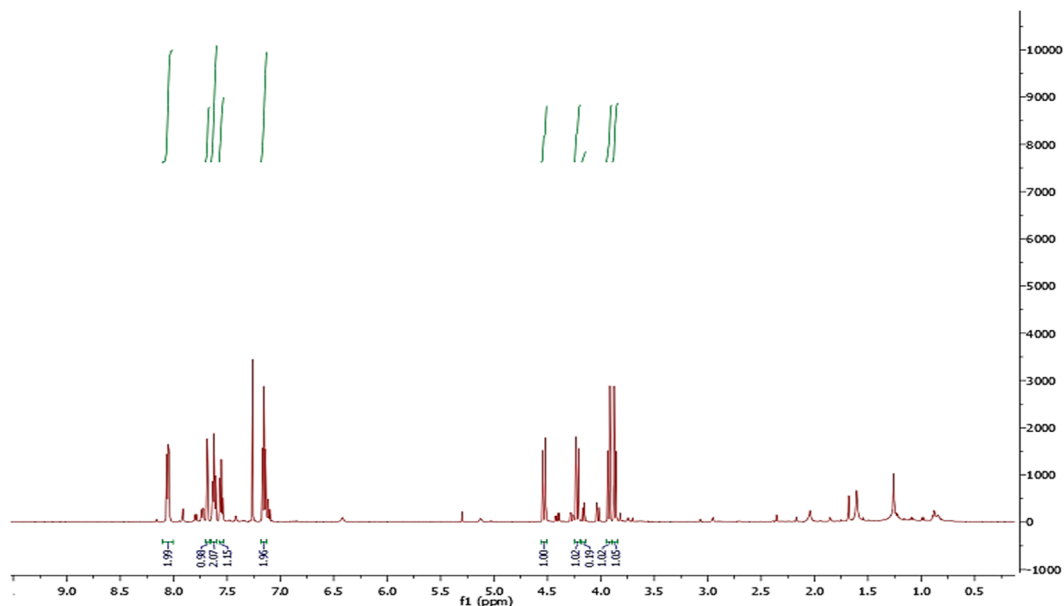

$^1\text{H}$  NMR (600 MHz,  $\text{CDCl}_3$ )  $\delta$  8.09 – 8.02 (m, 2H), 7.68 (s, 1H), 7.62 (t,  $J$  = 8.1 Hz, 2H), 7.55 (t,  $J$  = 7.8 Hz, 1H), 7.17 – 7.13 (m, 2H), 4.53 (d,  $J$  = 14.9 Hz, 1H), 4.22 (d,  $J$  = 14.9 Hz, 1H), 3.92 (d,  $J$  = 12.0 Hz, 1H), 3.87 (d,  $J$  = 12.0 Hz, 1H)

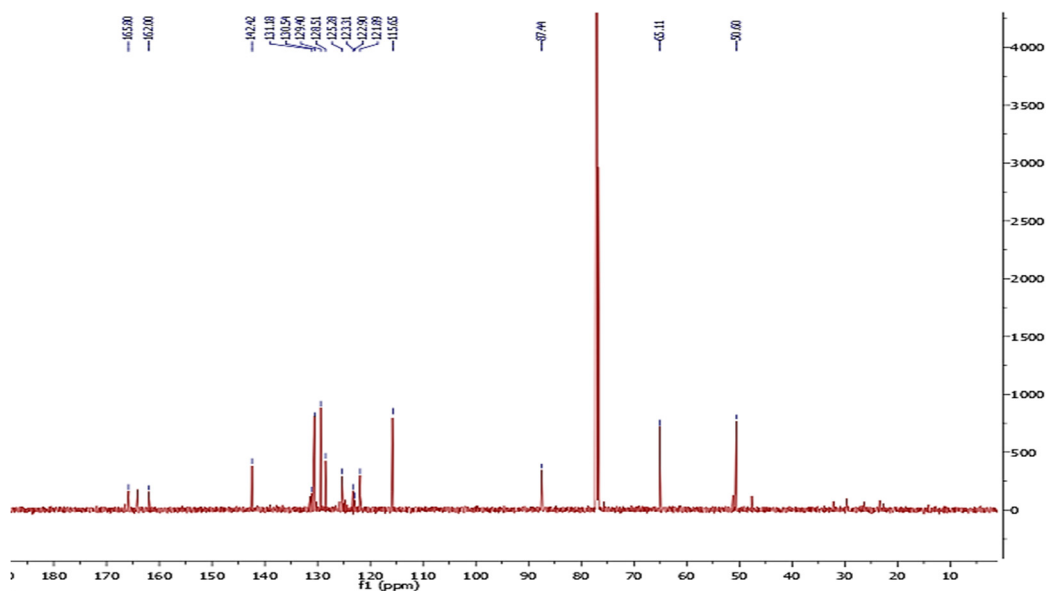

$^{13}\text{C}$  NMR (151 MHz,  $\text{CDCl}_3$ )  $\delta$  165.80 (d,  $J$  = 252.9 Hz), 162.00, 142.42, 131.18 (q,  $J$  = 31.71 Hz), 130.54 (d,  $J$  = 9.06 Hz), 129.40, 128.51, 125.28 (q,  $J$  = 3.02 Hz), 123.31 (d,  $J$  = 3.02 Hz), 122.90 (q,  $J$  = 271.9 Hz), 121.89 (q,  $J$  = 3.02 Hz), 115.65 (d,  $J$  = 22.65 Hz), 87.44, 65.11, 50.60

**2-(4-bromophenyl)-5-(chloromethyl)-5-(3-(trifluoromethyl)phenyl)-4,5-dihydrooxazole (7e)**

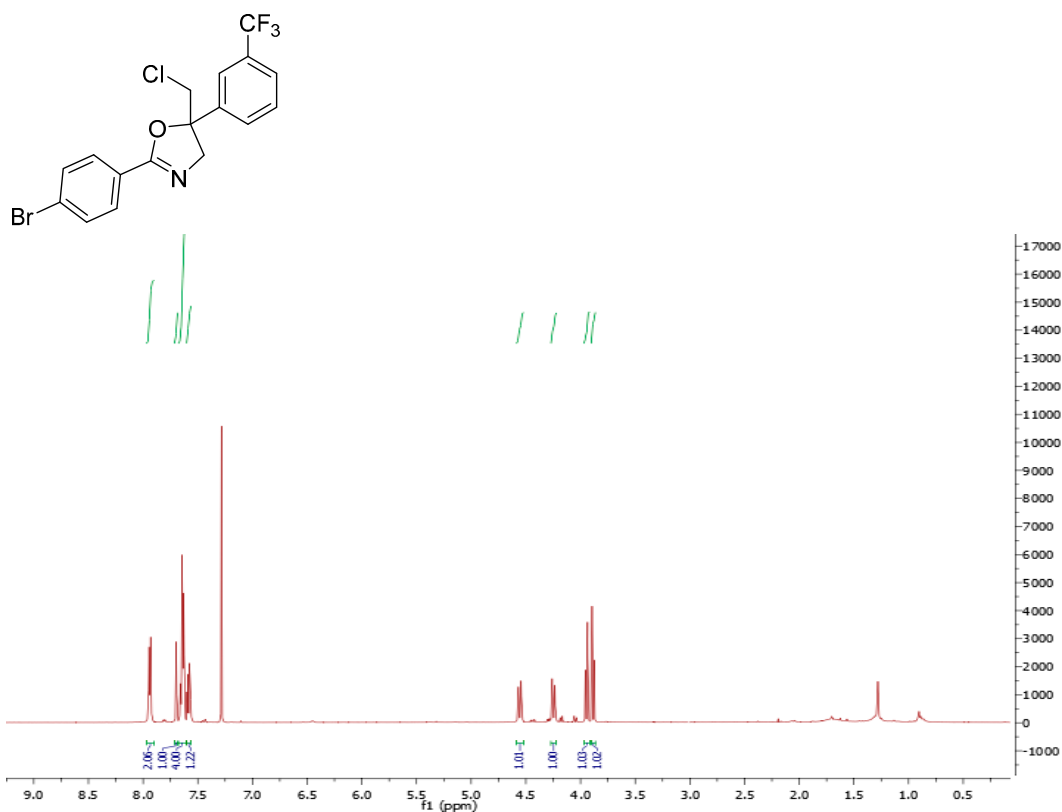

<sup>1</sup>H NMR (600 MHz, CDCl<sub>3</sub>)  $\delta$  7.94 (d,  $J$  = 8.3 Hz, 2H), 7.70 (s, 1H), 7.68 – 7.60 (m, 4H), 7.60 – 7.57 (m, 1H), 4.56 (d,  $J$  = 15.0 Hz, 1H), 4.25 (d,  $J$  = 15.0 Hz, 1H), 3.95 (d,  $J$  = 12.0 Hz, 1H), 3.88 (d,  $J$  = 12.0 Hz, 1H)

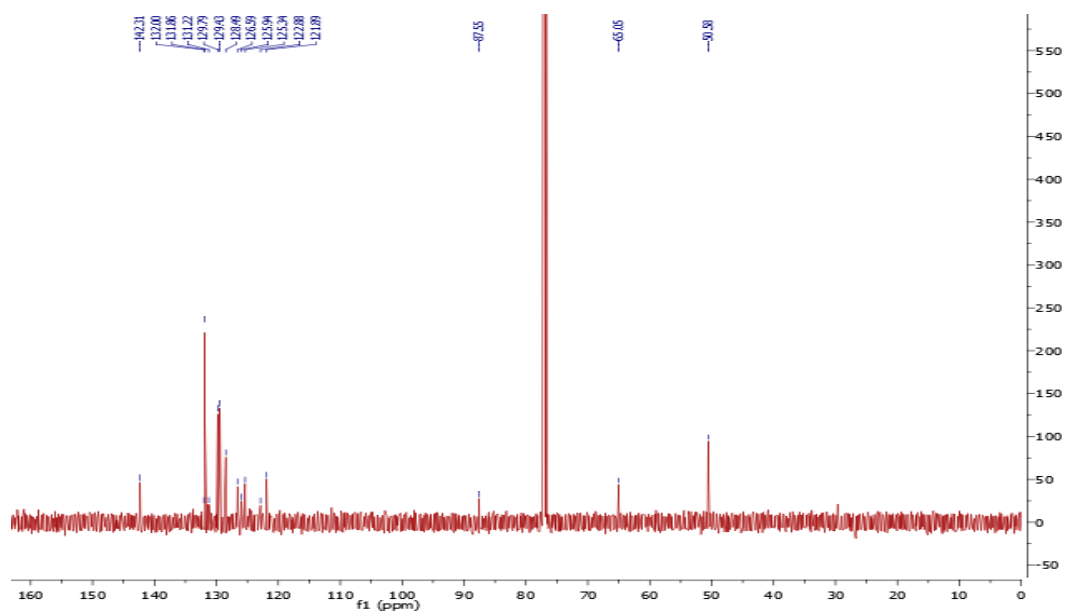

<sup>13</sup>C NMR (151 MHz, CDCl<sub>3</sub>)  $\delta$  142.31, 132.00, 131.86, 131.22 (q,  $J$  = 33.22 Hz), 129.79, 129.43, 128.49, 126.59, 125.94, 125.34 (q,  $J$  = 4.53 Hz), 122.88 (q,  $J$  = 271.8 Hz), 121.89 (q,  $J$  = 4.53 Hz), 87.55, 65.05, 50.58

**5-(chloromethyl)-5-(3-(trifluoromethyl)phenyl)-2-(4(trifluoromethyl)phenyl)-4,5-dihydrooxazole (7f)**

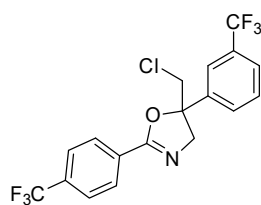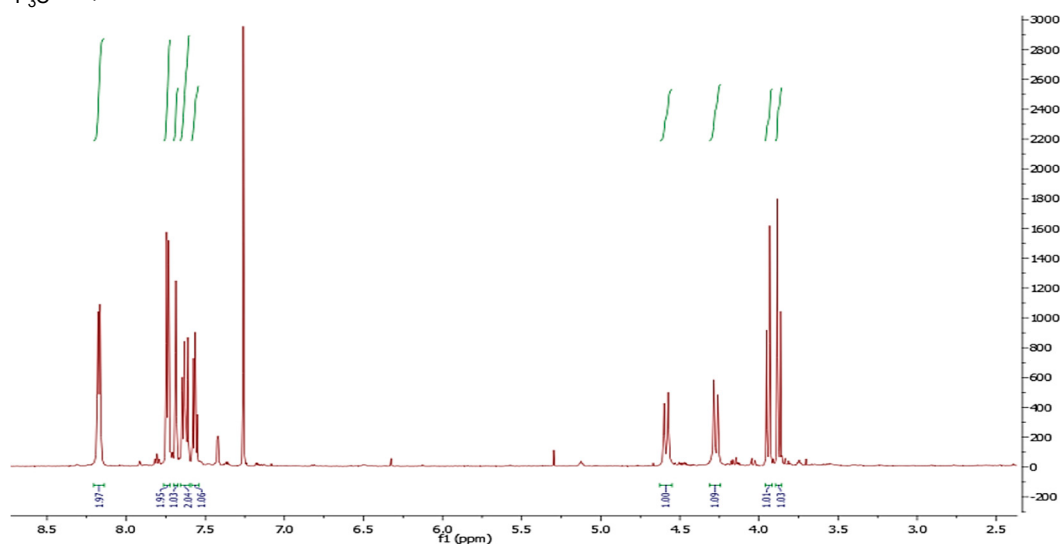

$^1\text{H}$  NMR (600 MHz,  $\text{CDCl}_3$ )  $\delta$  8.17 (d,  $J$  = 8.0 Hz, 2H), 7.74 (d,  $J$  = 8.1 Hz, 2H), 7.69 (s, 1H), 7.63 (dd,  $J$  = 13.1, 7.8 Hz, 2H), 7.56 (t,  $J$  = 7.7 Hz, 1H), 4.59 (d,  $J$  = 15.2 Hz, 1H), 4.27 (d,  $J$  = 15.2 Hz, 1H), 3.94 (d,  $J$  = 12.1 Hz, 1H), 3.87 (d, 1H)

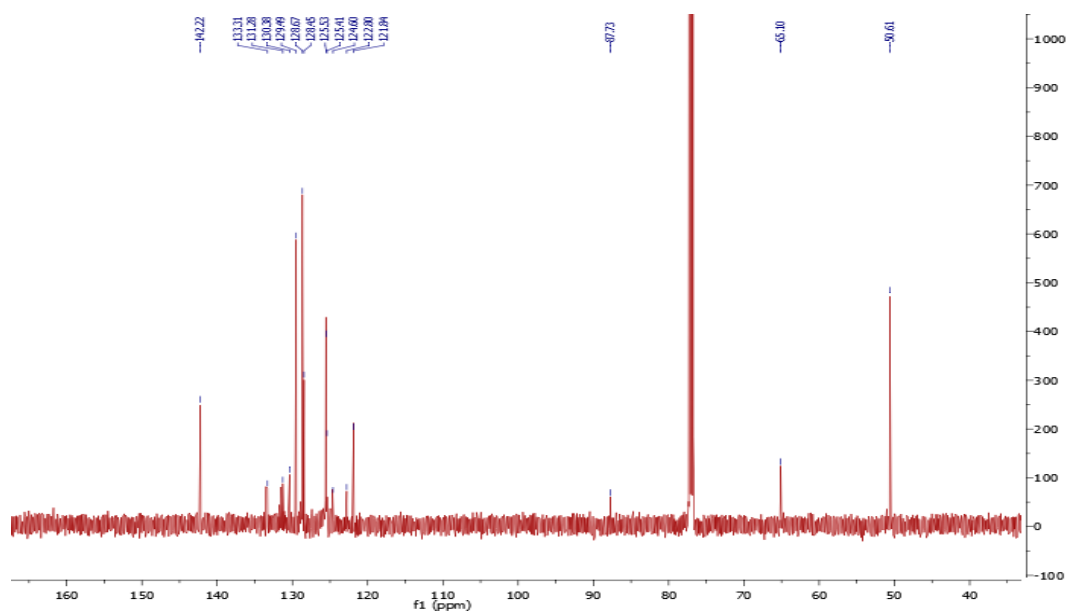

$^{13}\text{C}$  NMR (151 MHz,  $\text{CDCl}_3$ )  $\delta$  142.22, 133.31 (q,  $J$  = 31.71 Hz), 131.28 (q,  $J$  = 33.22 Hz), 130.38, 129.49, 128.67, 128.45, 125.53 (q,  $J$  = 4.53 Hz), 125.41 (q,  $J$  = 3.02 Hz), 122.85 (q,  $J$  = 273.31 Hz), 122.80 (q,  $J$  = 273.31 Hz), 121.84 (q,  $J$  = 3.02 Hz), 87.73, 65.10, 50.61

**5-(chloromethyl)-2-(4-nitrophenyl)-5-(3-(trifluoromethyl)phenyl)-4,5-dihydrooxazole (7g)**

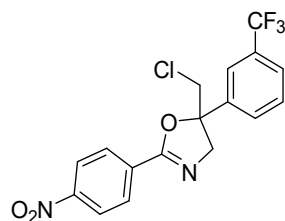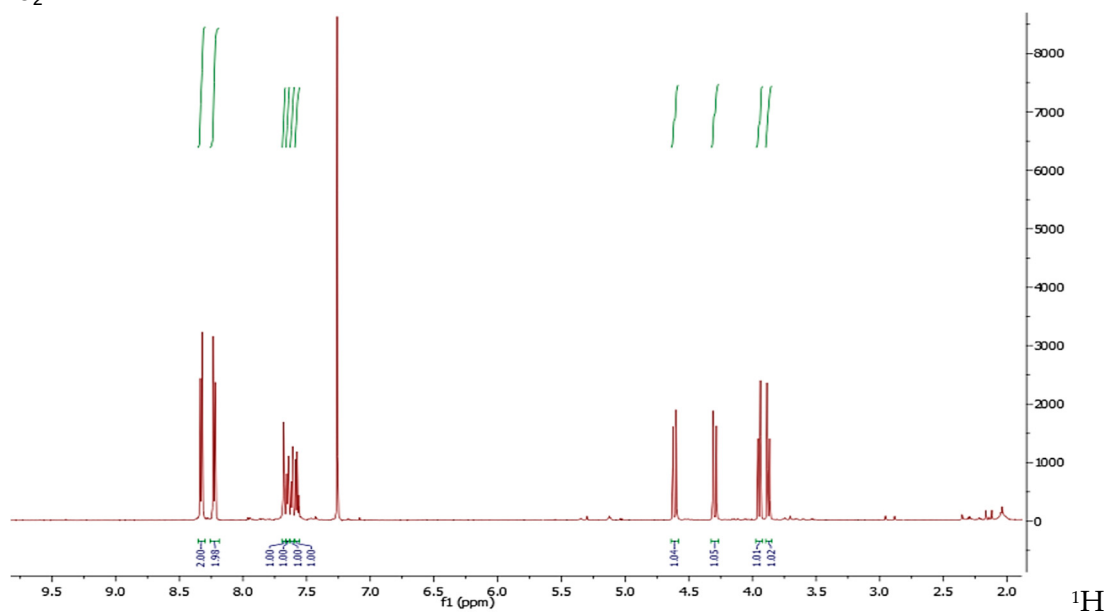

NMR (600 MHz, CDCl<sub>3</sub>) δ 8.33 (d, *J* = 8.8 Hz, 2H), 8.23 (d, *J* = 8.8 Hz, 2H), 7.68 (s, 1H), 7.65 (d, *J* = 7.6 Hz, 1H), 7.62 (d, *J* = 7.9 Hz, 1H), 7.57 (t, *J* = 7.7 Hz, 1H), 4.61 (d, *J* = 15.4 Hz, 1H), 4.30 (d, *J* = 15.4 Hz, 1H), 3.95 (d, *J* = 12.2 Hz, 1H), 3.88 (d, *J* = 12.2 Hz, 1H)

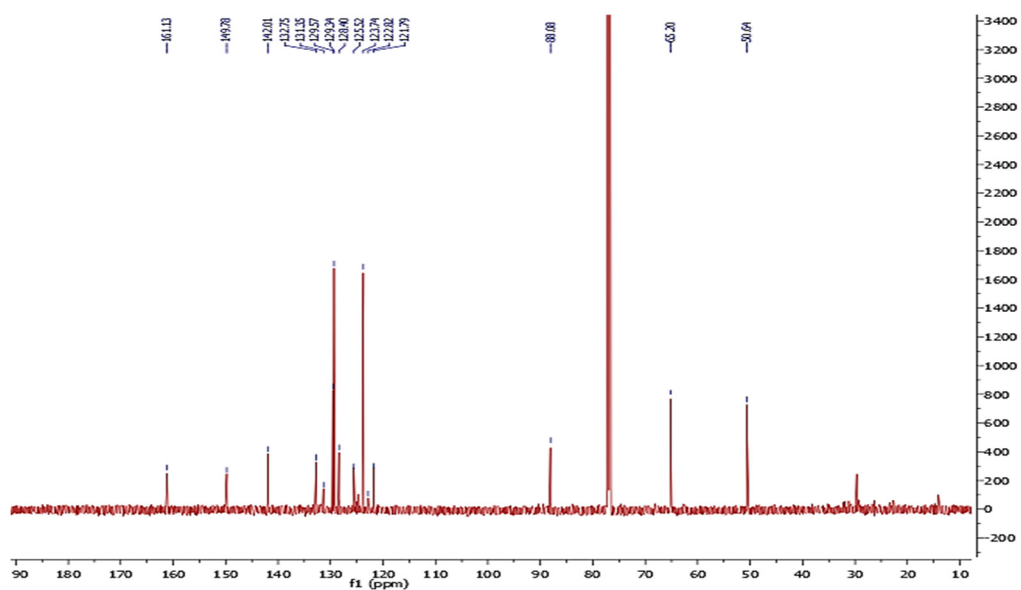

<sup>13</sup>C NMR (151 MHz, CDCl<sub>3</sub>) δ 161.13, 149.78, 142.01, 132.75, 131.35 (q, *J* = 31.71 Hz), 129.57, 129.34, 128.40, 125.52 (q, *J* = 3.02 Hz), 123.74, 122.82 (q, *J* = 271.8 Hz), 121.79 (q, *J* = 3.02 Hz), 88.08, 65.20, 50.64

**5-(chloromethyl)-2,5-diphenyl-4,5-dihydrooxazole (7h)**

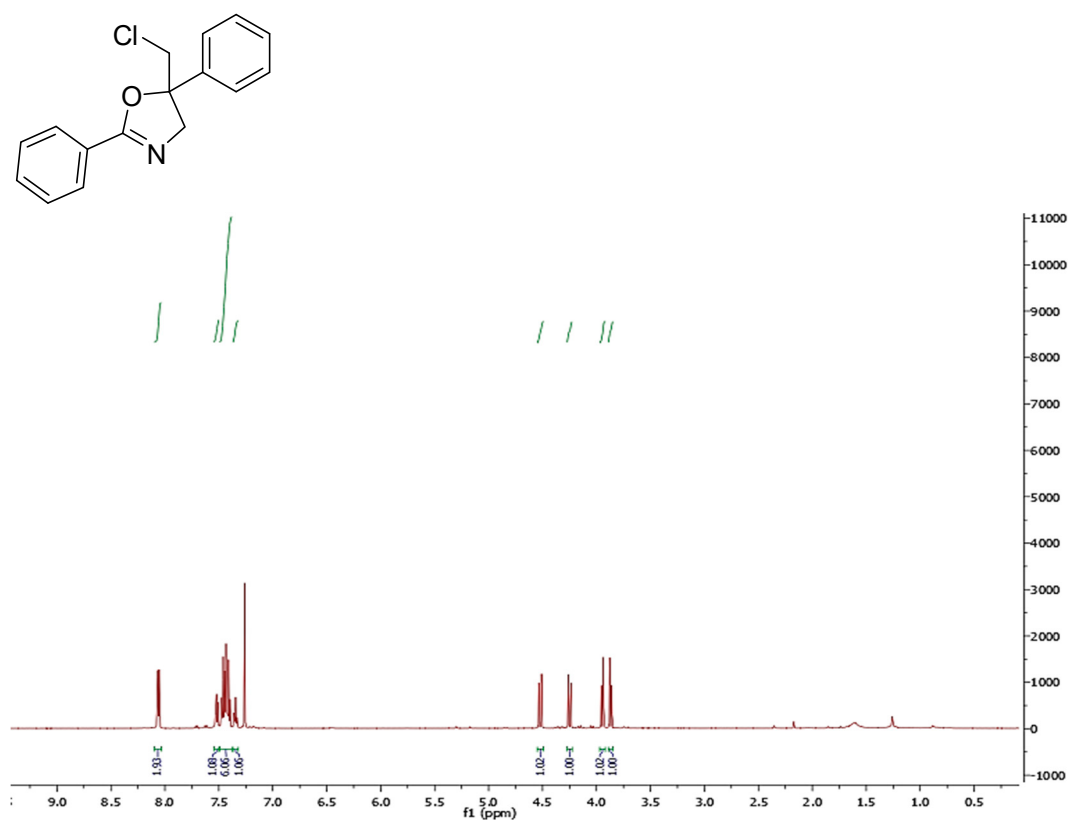

<sup>1</sup>H NMR (600 MHz, CDCl<sub>3</sub>)  $\delta$  8.06 (d,  $J$  = 7.2 Hz, 2H), 7.52 (t,  $J$  = 7.4 Hz, 1H), 7.48 – 7.38 (m, 6H), 7.34 (t,  $J$  = 6.4 Hz, 1H), 4.52 (d,  $J$  = 14.8 Hz, 1H), 4.25 (d,  $J$  = 14.8 Hz, 1H), 3.95 (d,  $J$  = 12.0 Hz, 1H), 3.87 (d,  $J$  = 12.0 Hz, 1H)

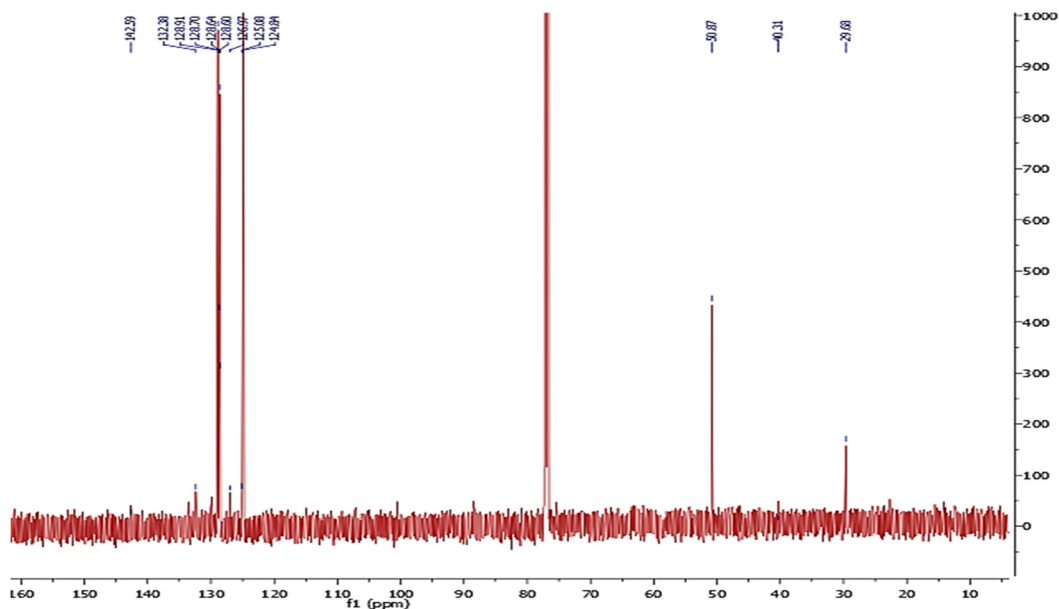

<sup>13</sup>C NMR (151 MHz, CDCl<sub>3</sub>)  $\delta$  142.59, 132.38, 128.91, 128.70, 128.64, 128.60, 126.97, 125.08, 124.84, 50.87, 40.31, 29.68

**5-(chloromethyl)-5-(4-fluorophenyl)-2-phenyl-4,5-dihydrooxazole (7i)**

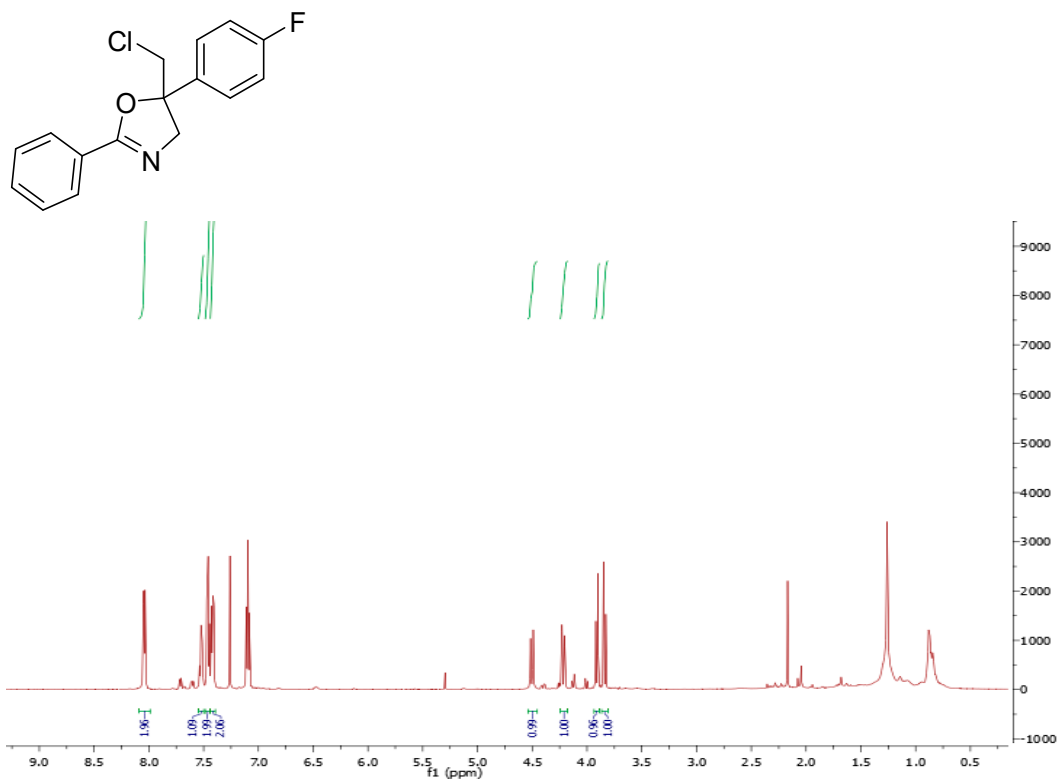

<sup>1</sup>H NMR (600 MHz, CDCl<sub>3</sub>)  $\delta$  8.04 (d,  $J$  = 7.4 Hz, 2H), 7.52 (t,  $J$  = 7.4 Hz, 1H), 7.46 (t,  $J$  = 7.5 Hz, 2H), 7.43 – 7.40 (m, 2H), 7.10 (dd,  $J$  = 12.0, 5.2 Hz, 2H), 4.50 (d,  $J$  = 14.8 Hz, 1H), 4.22 (d,  $J$  = 14.8 Hz, 1H), 3.91 (d, 1H), 3.84 (d,  $J$  = 12.0 Hz, 1H)

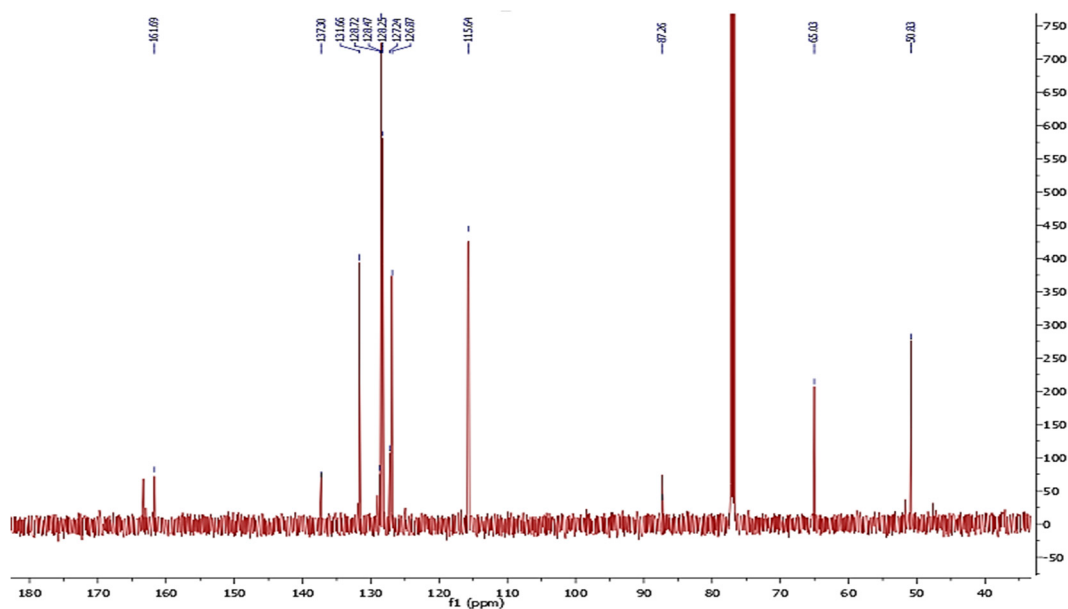

<sup>13</sup>C NMR (151 MHz, CDCl<sub>3</sub>)  $\delta$  161.69 (d,  $J$  = 243.11 Hz), 137.30 (d,  $J$  = 3.02 Hz), 131.66, 128.72, 128.47, 128.25, 127.24, 126.87 (d,  $J$  = 9.06 Hz), 115.64 (d,  $J$  = 22.65 Hz), 87.26, 65.03, 50.83

**4-(5-(chloromethyl)-2-phenyl-4,5-dihydrooxazol-5-yl)-N-isobutylbenzamide (7j)**

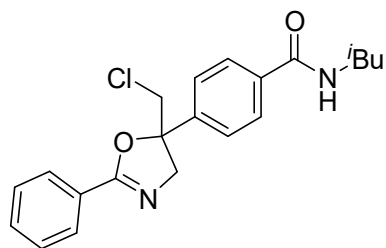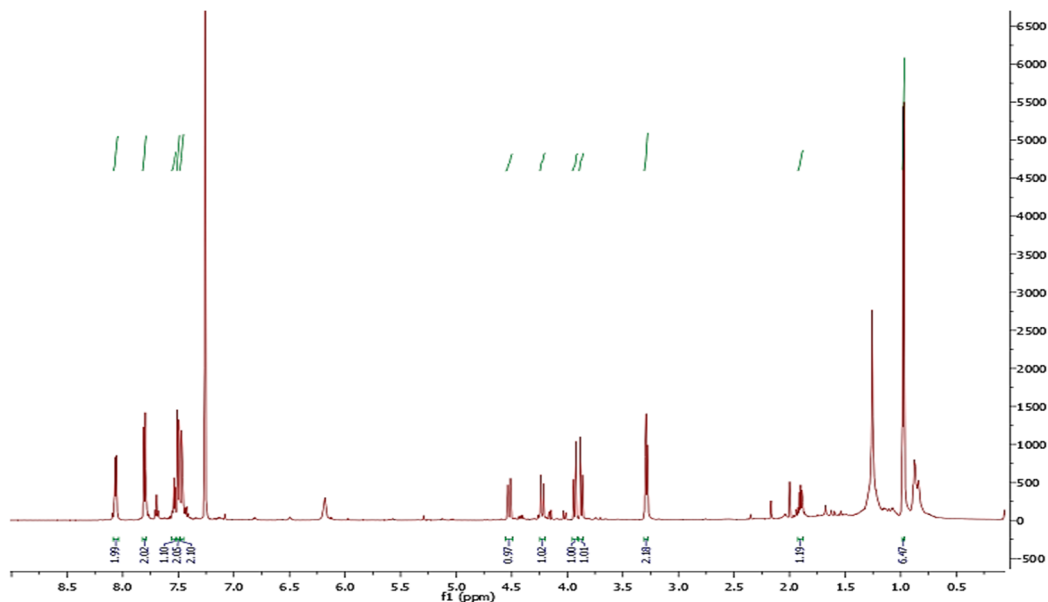

$^1\text{H}$  NMR (600 MHz,  $\text{CDCl}_3$ )  $\delta$  8.06 (d,  $J = 7.4$  Hz, 2H), 7.80 (d,  $J = 8.4$  Hz, 2H), 7.54 (t,  $J = 7.4$  Hz, 1H), 7.50 (d,  $J = 8.4$  Hz, 2H), 7.47 (t,  $J = 7.6$  Hz, 2H), 6.18 (s,  $J = 20.8$  Hz, 1H), 4.52 (d,  $J = 14.8$  Hz, 1H), 4.23 (d, 1H), 3.93 (d,  $J = 12.0$  Hz, 1H), 3.87 (d,  $J = 12.0$  Hz, 1H), 3.29 (t,  $J = 6.4$  Hz, 2H), 1.90 (dt,  $J = 13.4, 6.7$  Hz, 1H), 0.98 (d,  $J = 6.7$  Hz, 6H)

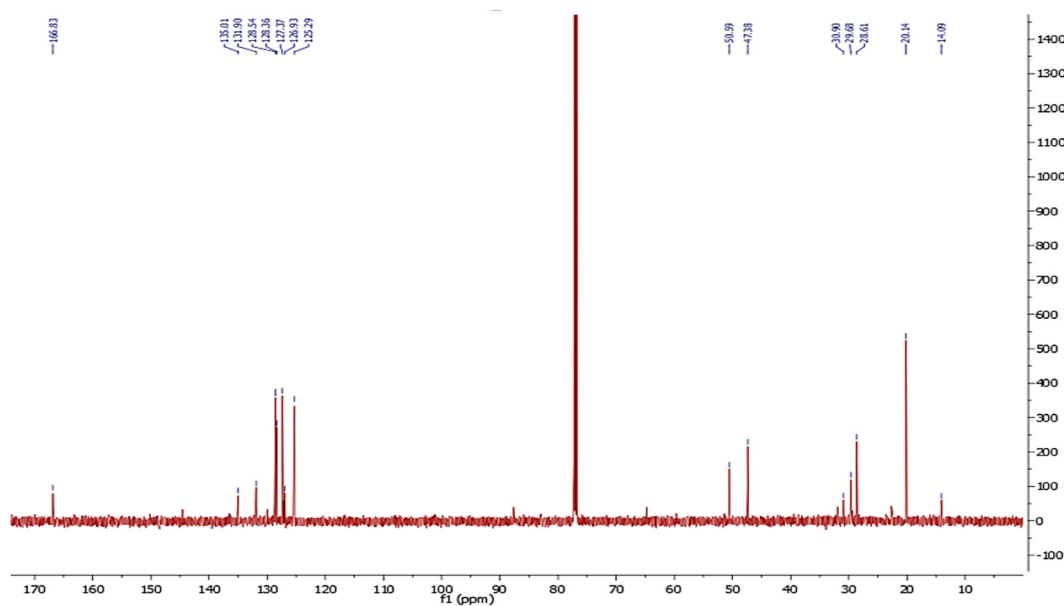

$^{13}\text{C}$  NMR (151 MHz,  $\text{CDCl}_3$ )  $\delta$  166.83, 135.01, 131.90, 128.54, 128.36, 127.37, 126.93, 125.29, 50.59, 47.38, 30.90, 29.68, 28.61, 20.14, 14.09

**5-(chloromethyl)-2-phenyl-5-(4-(trifluoromethyl)phenyl)-4,5-dihydrooxazole (7k)**

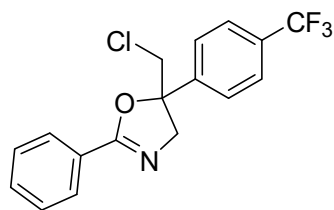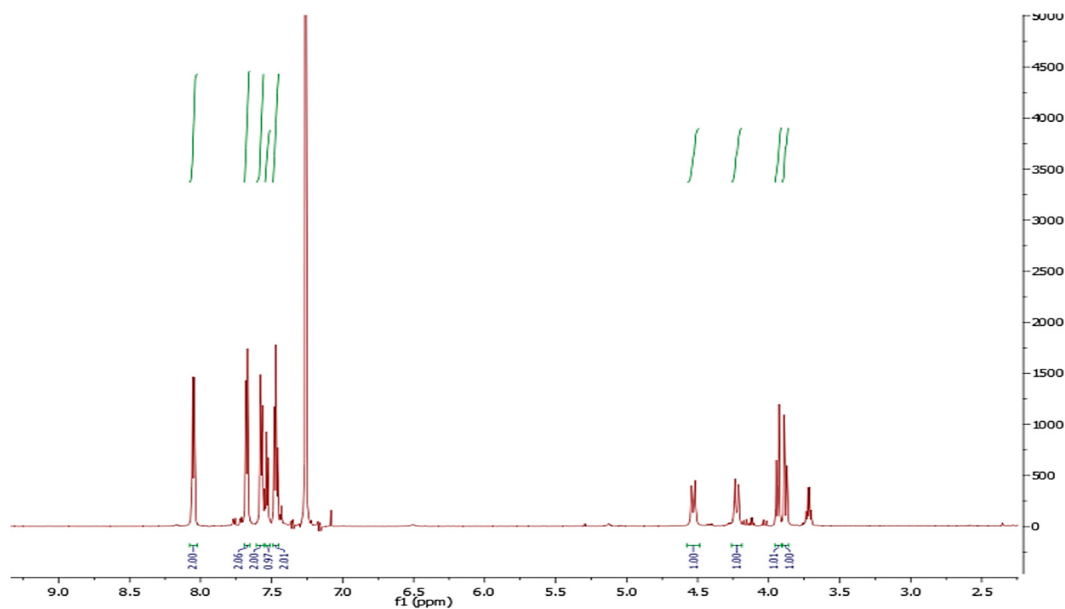

$^1\text{H}$  NMR (600 MHz,  $\text{CDCl}_3$ )  $\delta$  8.05 (d,  $J$  = 7.4 Hz, 2H), 7.68 (d,  $J$  = 8.0 Hz, 2H), 7.57 (d,  $J$  = 8.1 Hz, 2H), 7.53 (d,  $J$  = 7.4 Hz, 1H), 7.47 (t,  $J$  = 7.5 Hz, 2H), 4.53 (d,  $J$  = 14.6 Hz, 1H), 4.22 (d,  $J$  = 14.6 Hz, 1H), 3.94 (d,  $J$  = 12.0 Hz, 1H), 3.88 (d,  $J$  = 12.0 Hz, 1H)

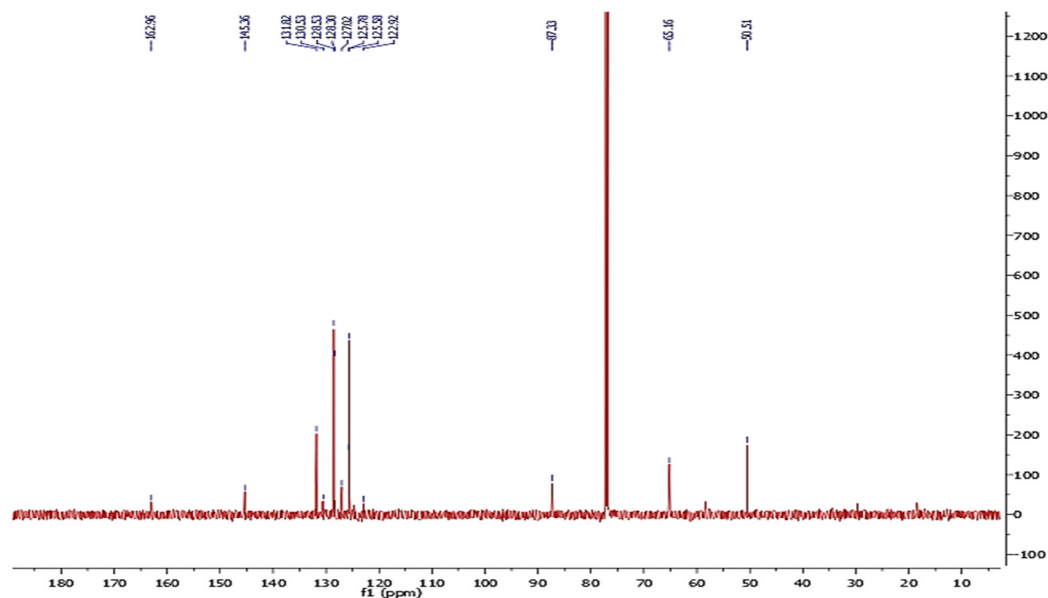

$^{13}\text{C}$  NMR (151 MHz,  $\text{CDCl}_3$ )  $\delta$  162.96, 145.36, 131.82, 130.53 (q,  $J$  = 31.71 Hz), 128.53, 128.30, 127.02, 125.78 (q,  $J$  = 3.02 Hz), 125.58, 122.92 (q,  $J$  = 271.8 Hz), 87.33, 65.16, 50.51

**4-(5-(chloromethyl)-2-phenyl-4,5-dihydrooxazol-5-yl)benzonitrile (7l)**

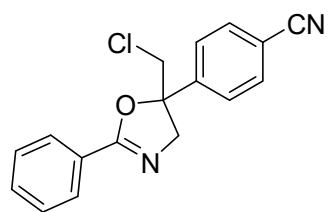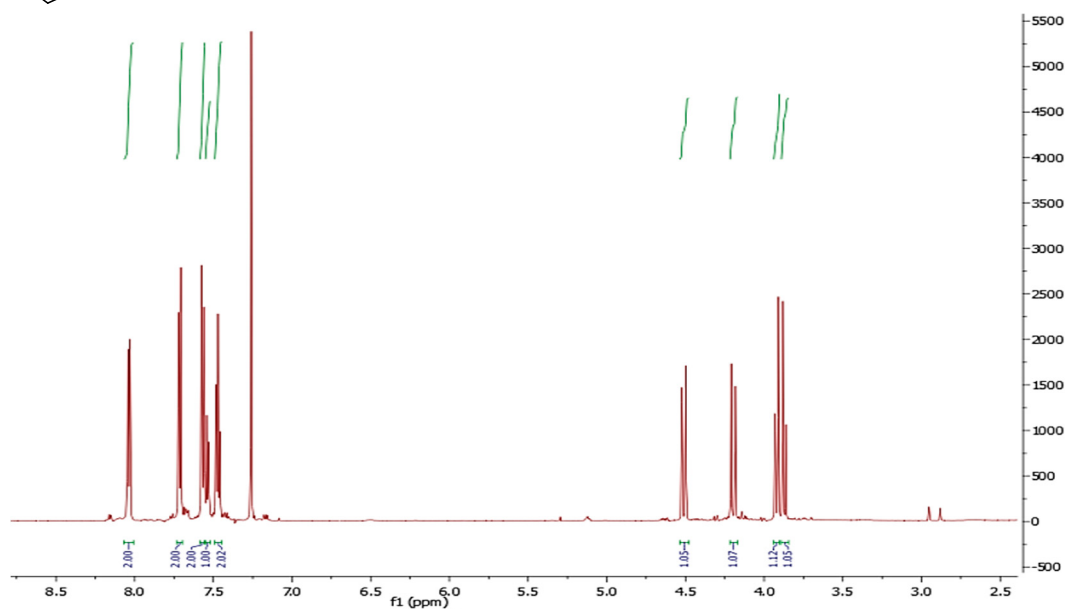

$^1\text{H}$  NMR (600 MHz,  $\text{CDCl}_3$ )  $\delta$  8.04 (d,  $J$  = 7.2 Hz, 2H), 7.71 (d,  $J$  = 8.5 Hz, 2H), 7.57 (d,  $J$  = 8.5 Hz, 2H), 7.54 (d,  $J$  = 7.5 Hz, 1H), 7.47 (t,  $J$  = 7.6 Hz, 2H), 4.51 (d,  $J$  = 15.0 Hz, 1H), 4.20 (d,  $J$  = 15.0 Hz, 1H), 3.92 (d,  $J$  = 12.0 Hz, 1H), 3.87 (d,  $J$  = 12.0 Hz, 1H)

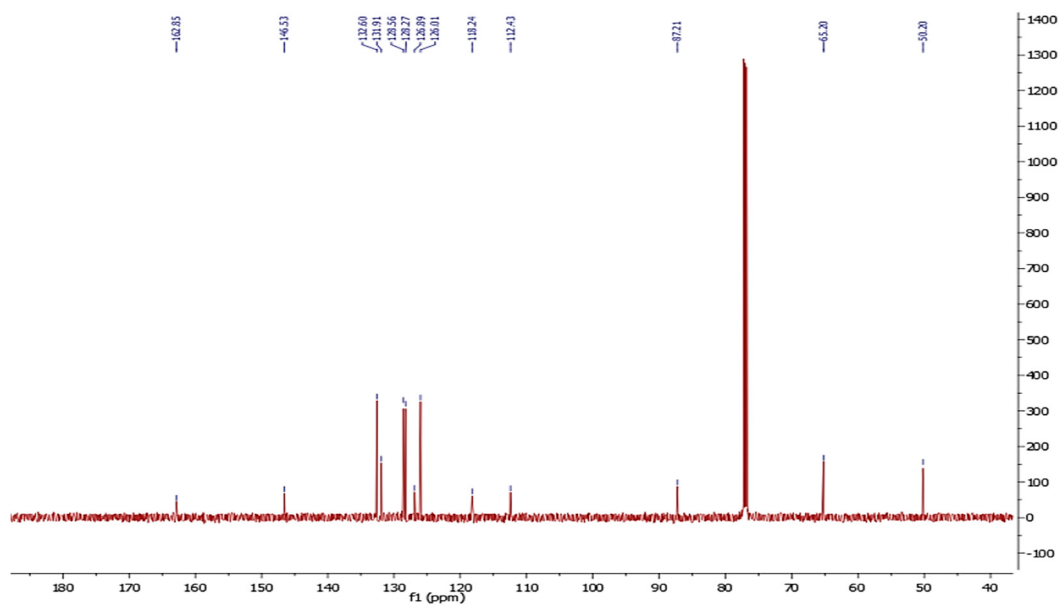

$^{13}\text{C}$  NMR (151 MHz,  $\text{CDCl}_3$ )  $\delta$  162.85, 146.53, 132.60, 131.91, 128.56, 128.27, 126.89, 126.01, 118.24, 112.43, 87.21, 65.20, 50.20

**5-(chloromethyl)-5-(3-methoxyphenyl)-2-phenyl-4,5-dihydrooxazole (7m)**

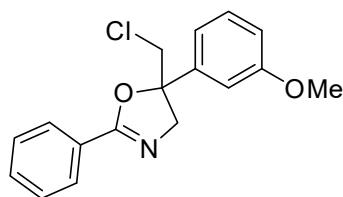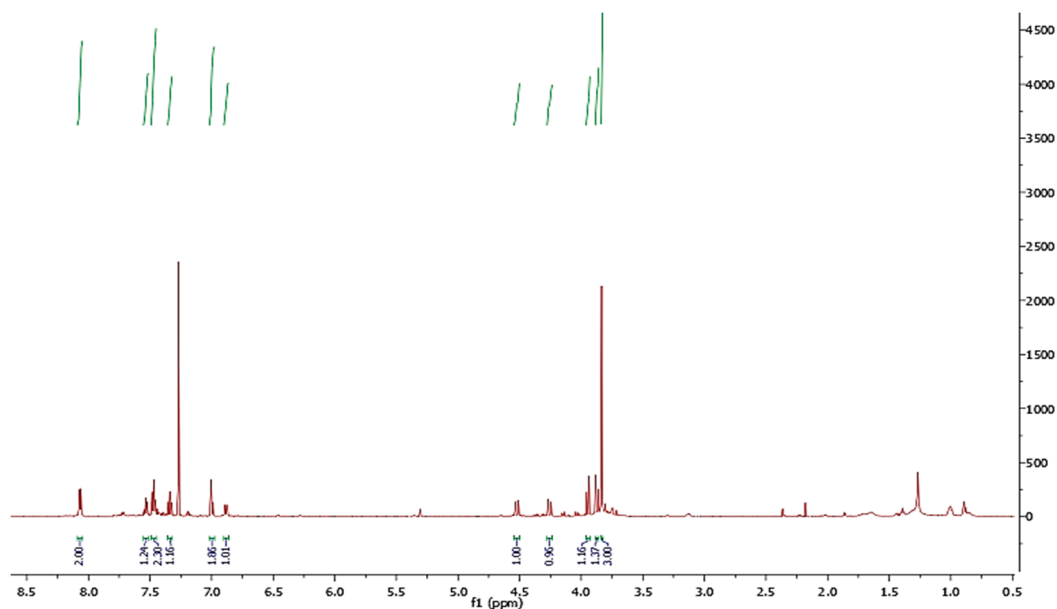

$^1\text{H}$  NMR (600 MHz,  $\text{CDCl}_3$ )  $\delta$  8.07 (d,  $J = 7.2$ , 2H), 7.53 (dd,  $J = 11.8$ , 4.3 Hz, 1H), 7.47 (t,  $J = 7.6$  Hz, 2H), 7.34 (dd,  $J = 9.8$ , 6.2 Hz, 1H), 7.02 – 6.98 (m, 2H), 6.90 – 6.86 (m, 1H), 4.53 (d,  $J = 15$  Hz, 1H), 4.26 (d,  $J = 15$  Hz, 1H), 3.95 (d,  $J = 12$  Hz, 1H), 3.87 (d,  $J = 12$  Hz, 1H), 3.83 (s, 3H)

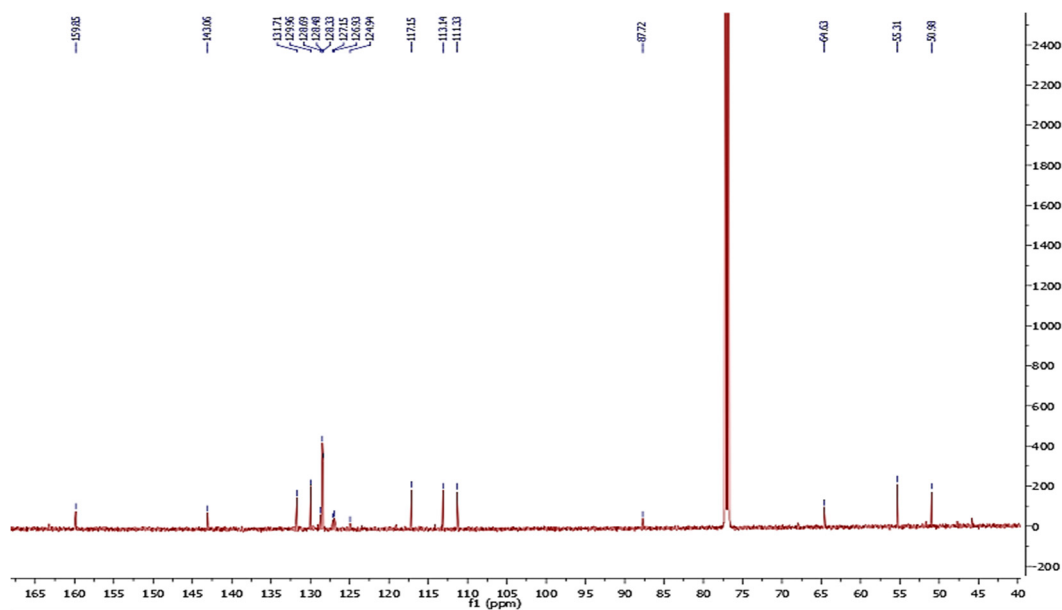

$^{13}\text{C}$  NMR (151 MHz,  $\text{CDCl}_3$ )  $\delta$  159.85, 143.06, 131.71, 129.96, 128.69, 128.48, 128.33, 127.15, 126.93, 124.94, 117.15, 113.14, 111.33, 87.72, 64.63, 55.31, 50.98

**3-(5-(chloromethyl)-2-phenyl-4,5-dihydrooxazol-5-yl)benzonitrile (7n)**

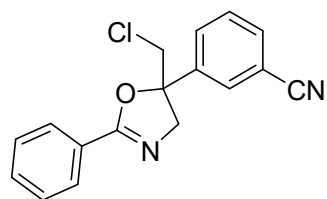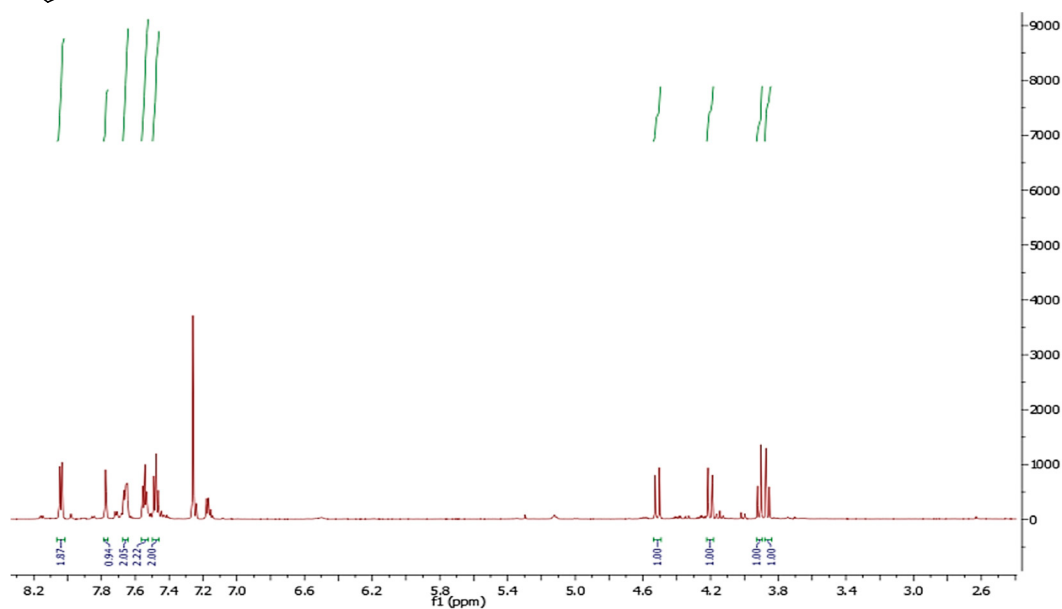

$^1\text{H}$  NMR (600 MHz,  $\text{CDCl}_3$ )  $\delta$  8.04 (d,  $J$  = 7.1 Hz, 2H), 7.78 (s,  $J$  = 1.4 Hz, 1H), 7.67 – 7.64 (m, 2H), 7.56 – 7.52 (m, 2H), 7.48 (t,  $J$  = 7.6 Hz, 2H), 4.51 (d,  $J$  = 15.0 Hz, 1H), 4.20 (d,  $J$  = 15.0 Hz, 1H), 3.93 – 3.89 (m, 1H), 3.86 (d,  $J$  = 12.0 Hz, 1H)

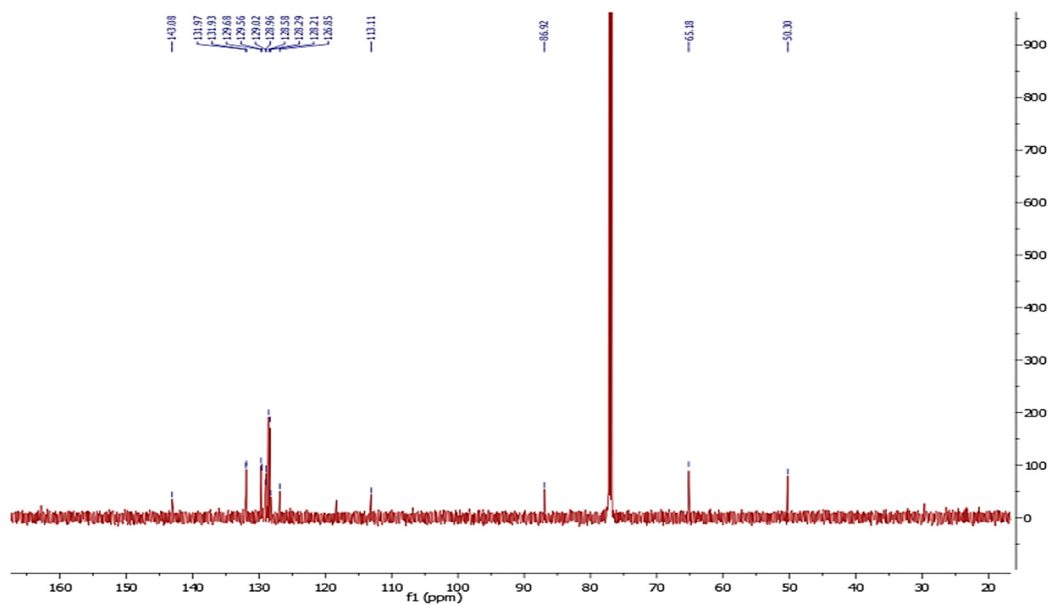

$^{13}\text{C}$  NMR (151 MHz,  $\text{CDCl}_3$ )  $\delta$  143.08, 131.97, 131.93, 129.68, 129.56, 129.02, 128.96, 128.58, 128.29, 128.21, 126.85, 113.11, 86.92, 65.18, 50.30

**4-((4-(5-(chloromethyl)-2-phenyl-4,5-dihydrooxazol-5-yl) phenyl) sulfonyl) morpholine (7o)**

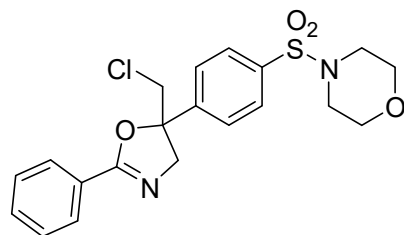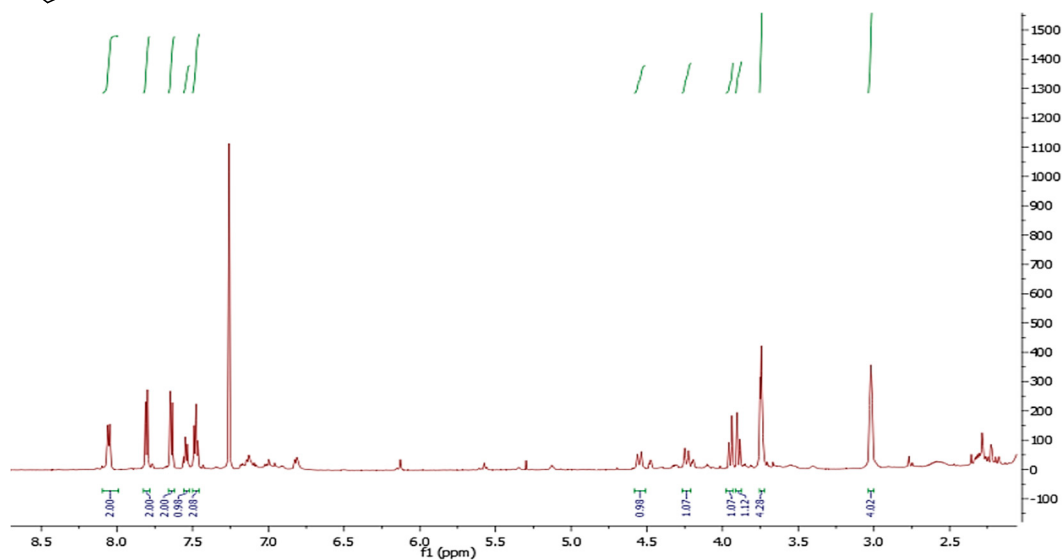

$^1\text{H}$  NMR (600 MHz,  $\text{CDCl}_3$ )  $\delta$  8.05 (d,  $J$  = 7.5 Hz, 2H), 7.81 (d,  $J$  = 8.4 Hz, 2H), 7.64 (d,  $J$  = 8.4 Hz, 2H), 7.54 (d,  $J$  = 7.4 Hz, 1H), 7.48 (t,  $J$  = 7.5 Hz, 2H), 4.55 (d,  $J$  = 14.9 Hz, 1H), 4.24 (d,  $J$  = 14.8 Hz, 1H), 3.95 (d,  $J$  = 12.0 Hz, 1H), 3.89 (d,  $J$  = 12.0 Hz, 1H), 3.76 – 3.72 (m, 4H), 3.04 – 3.00 (m, 4H)

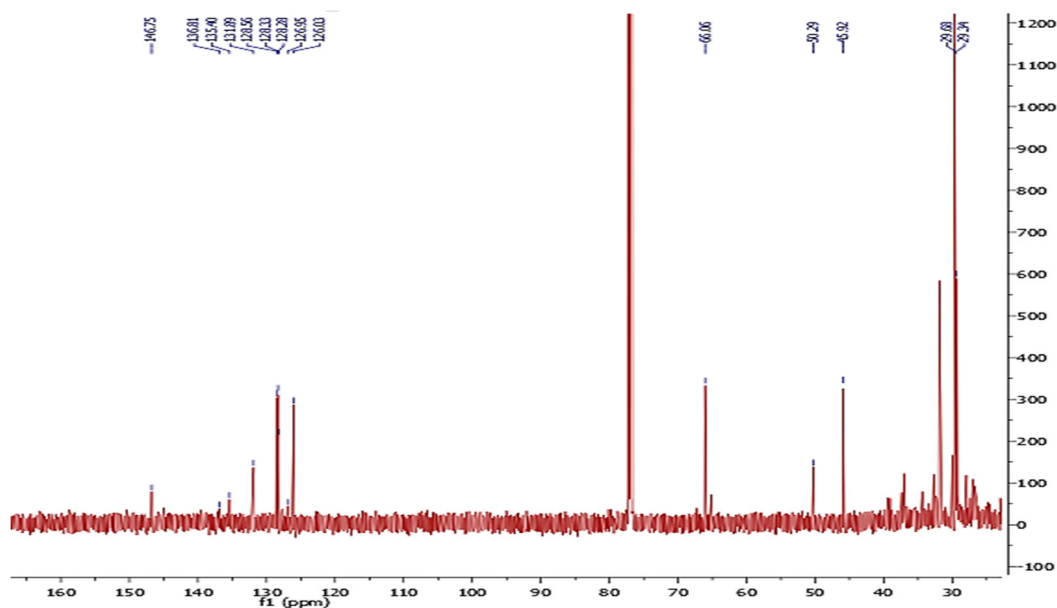

$^{13}\text{C}$  NMR (151 MHz,  $\text{CDCl}_3$ )  $\delta$  146.75, 136.81, 135.40, 131.89, 128.56, 128.33, 128.28, 126.95, 126.03, 66.06, 50.29, 45.92, 29.68, 29.34

**5-(chloromethyl)-2-phenyl-5-(pyridin-3-yl)-4,5-dihydrooxazole (7q)**

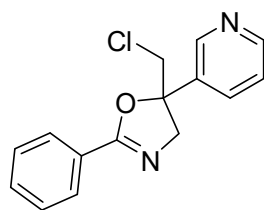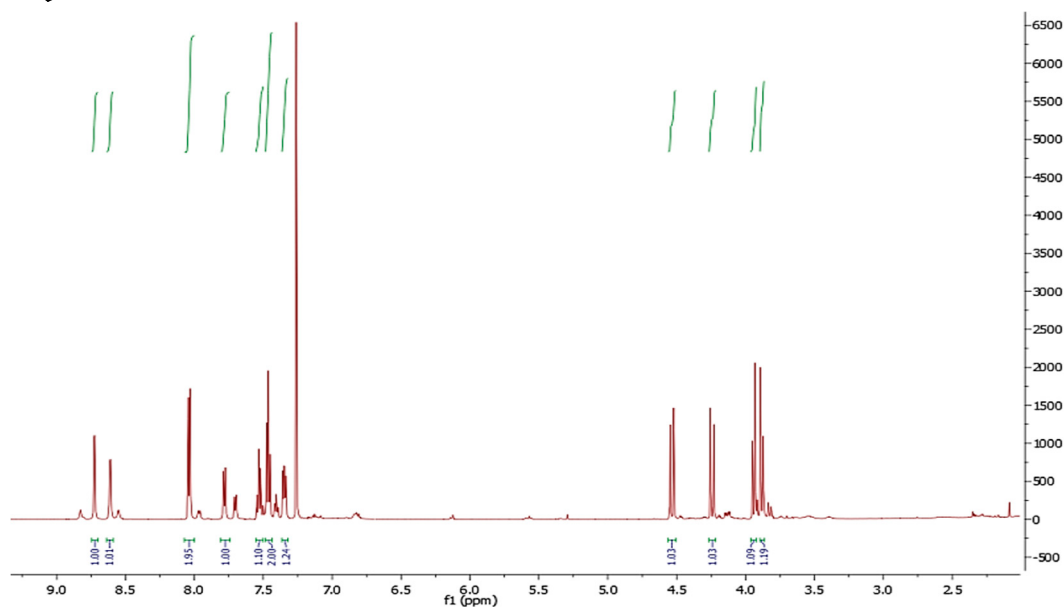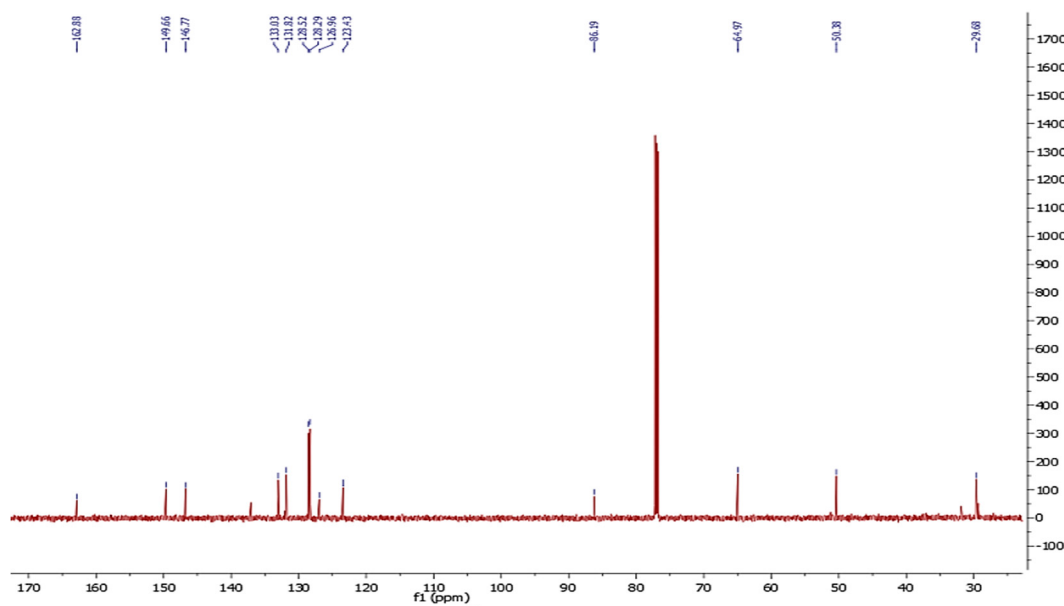

**5-(chloromethyl)-5-(naphthalen-1-yl)-2-phenyl-4,5-dihydrooxazole (7p)**

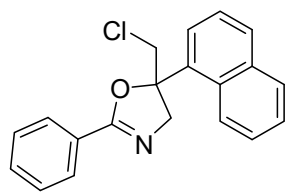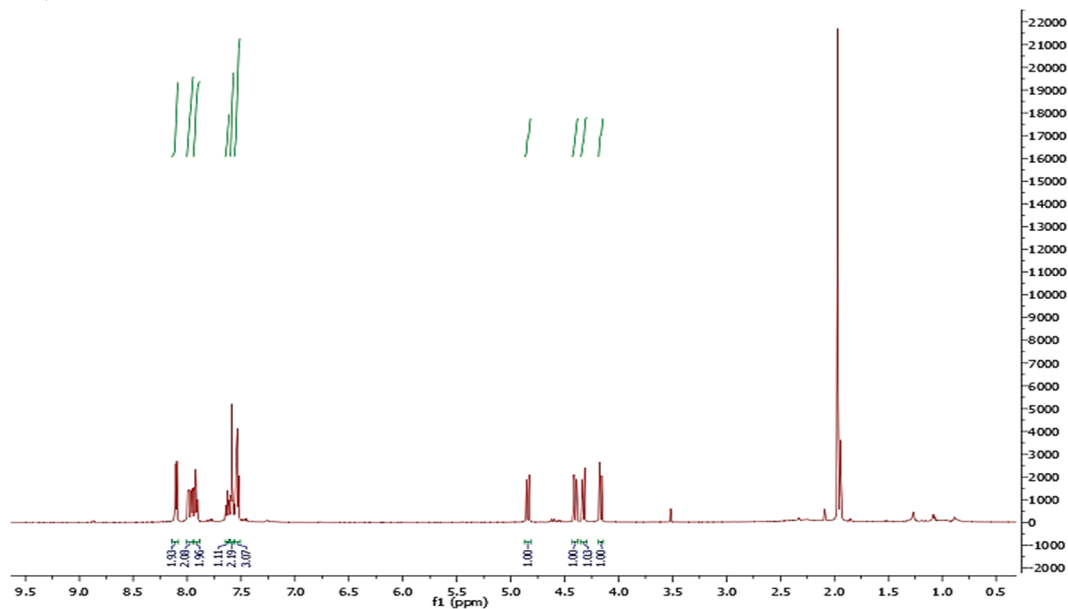

<sup>1</sup>H NMR (600 MHz, CD<sub>3</sub>CN) δ 8.13 – 8.08 (m, 2H), 7.97 (dd, *J* = 19.4, 7.6 Hz, 2H), 7.92 (t, *J* = 9.0 Hz, 2H), 7.65 – 7.61 (m, 1H), 7.59 (dd, *J* = 8.1, 5.0 Hz, 2H), 7.53 (t, *J* = 7.6 Hz, 3H), 4.84 (d, *J* = 15.2 Hz, 1H), 4.40 (d, *J* = 15.1 Hz, 1H), 4.33 (d, *J* = 12.5 Hz, 1H), 4.17 (d, *J* = 12.5 Hz, 1H)

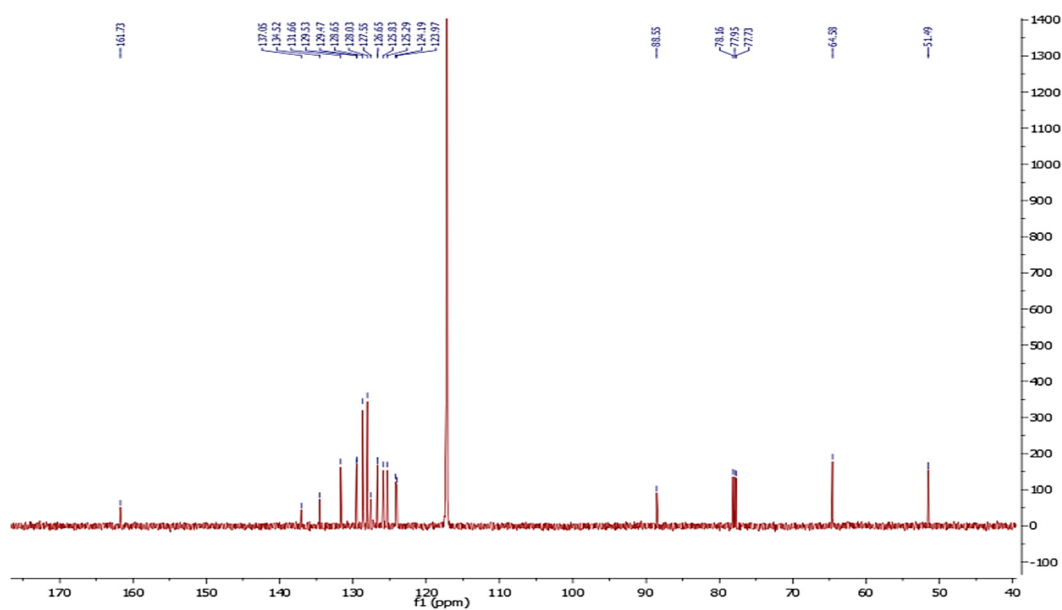

<sup>13</sup>C NMR (151 MHz, CD<sub>3</sub>CN) δ 161.73, 137.05, 134.52, 131.66, 129.53, 129.47, 128.65, 128.03, 127.55, 126.65, 125.83, 125.29, 124.19, 123.97, 88.55, 78.16, 77.95, 77.73, 64.58, 51.49

**5-(chloromethyl)-2-phenyl-5-(quinolin-6-yl)-4,5-dihydrooxazole (7r)**

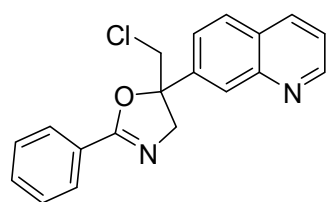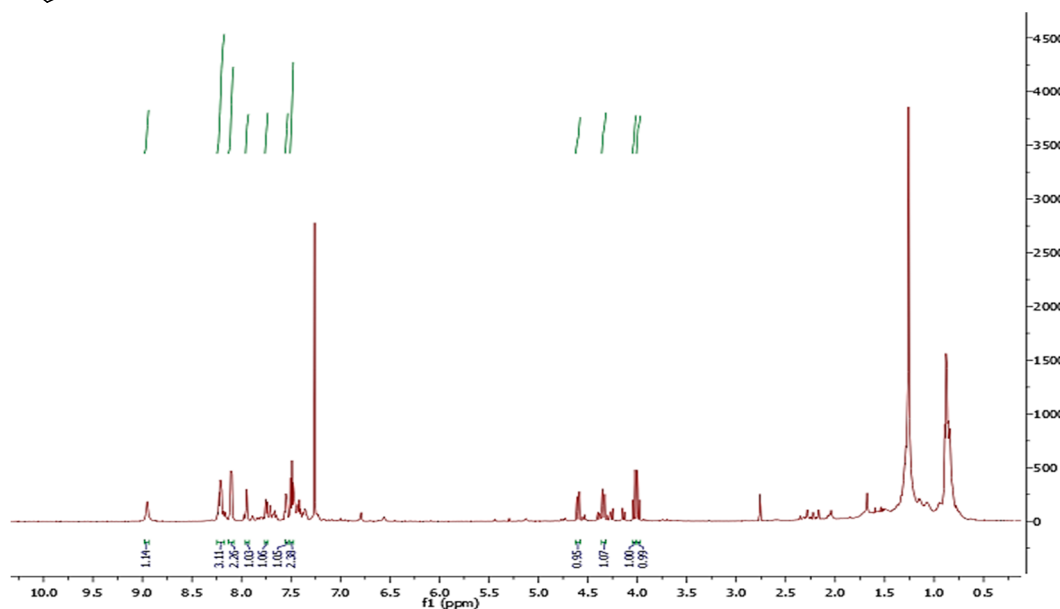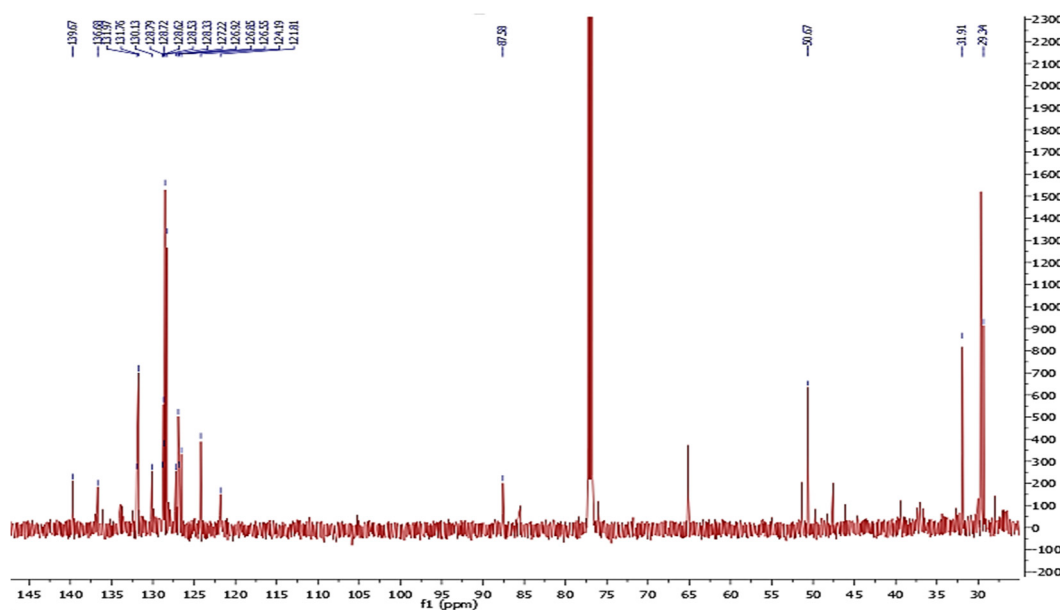

**5-(chloromethyl)-5-(quinolin-6-yl)-2-(p-tolyl)-4,5-dihydrooxazole (7s)**

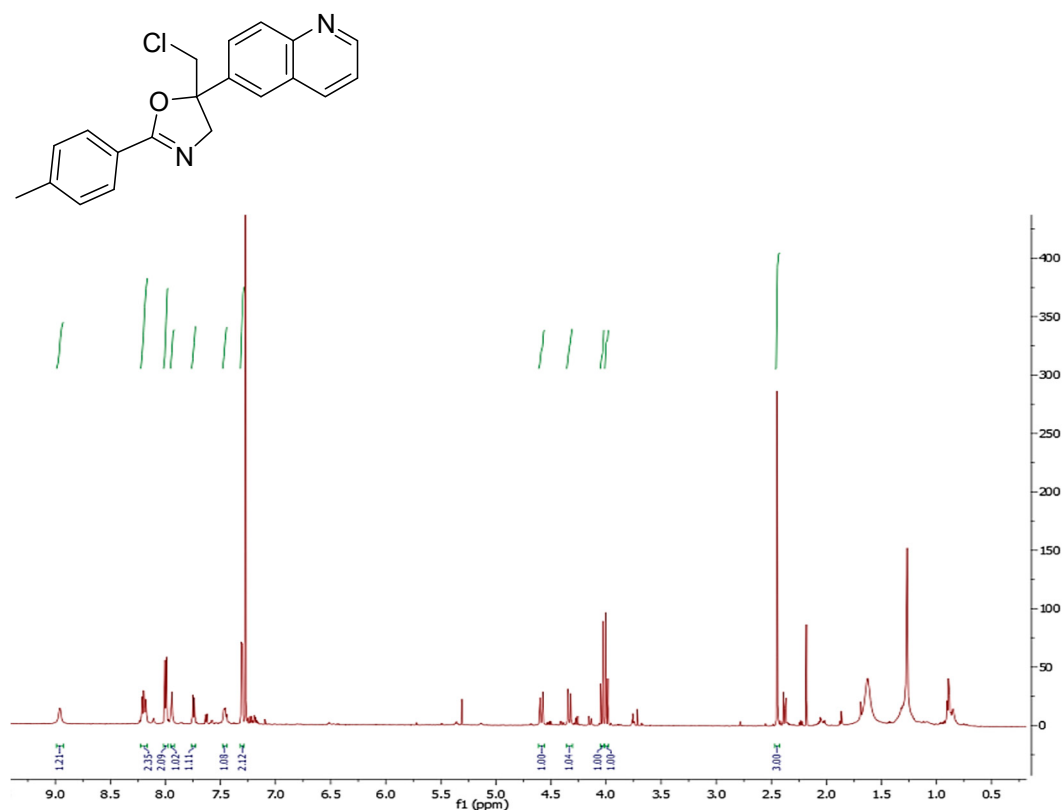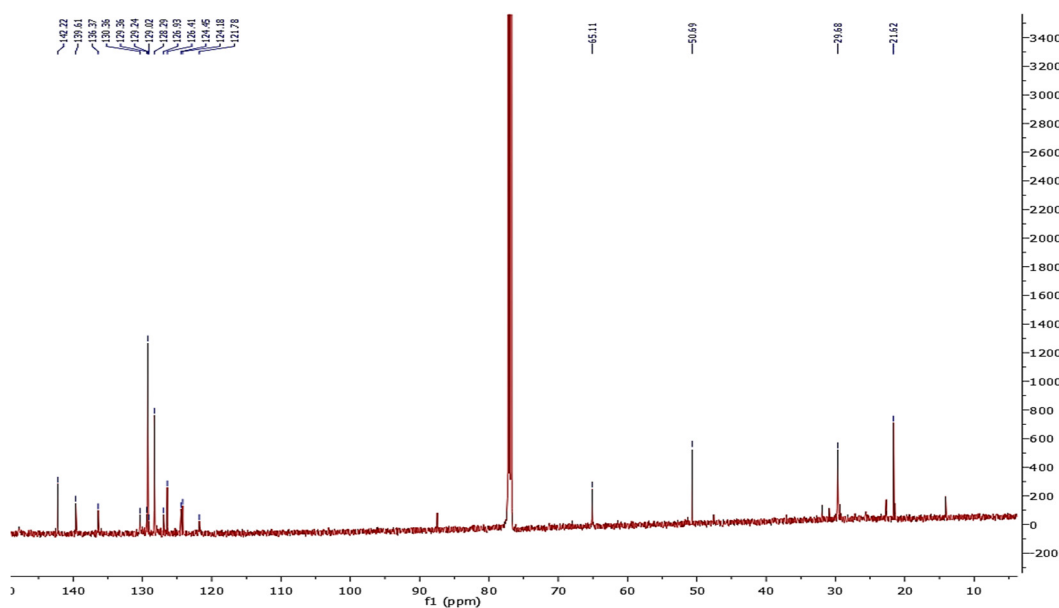

**4-(5-(chloromethyl)-2-(p-tolyl)-4,5-dihydrooxazol-5-yl)-N-isobutyl benzamide (7t)**

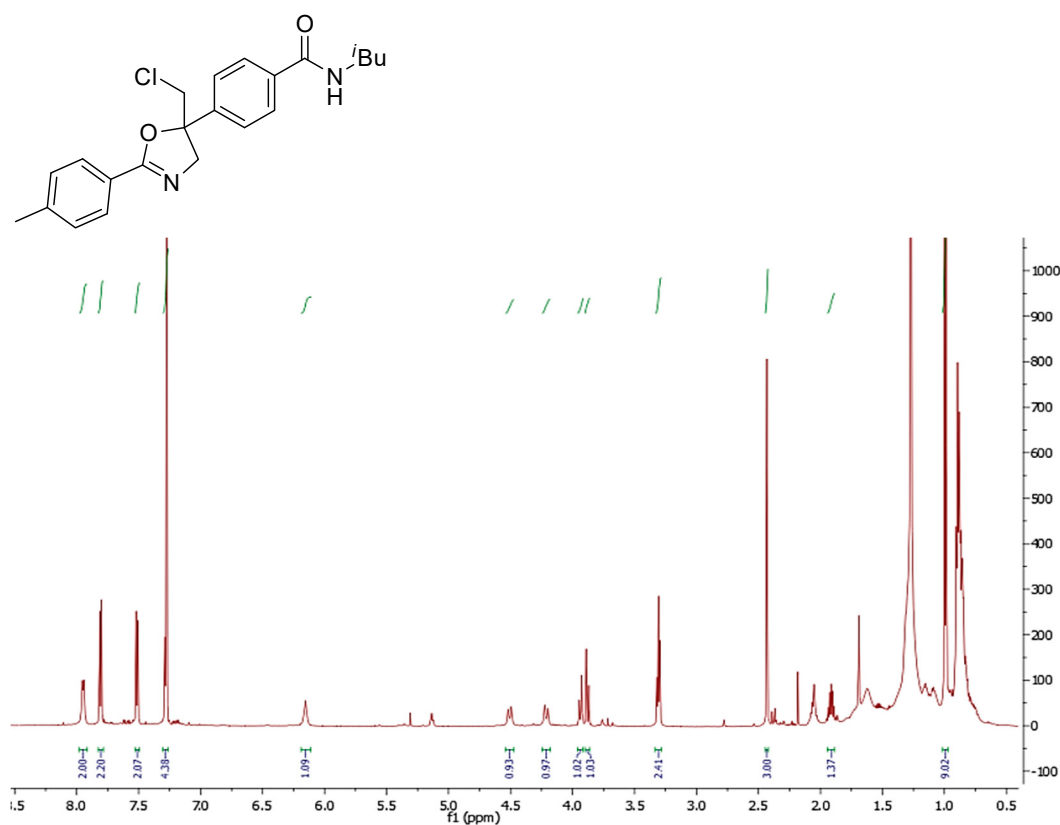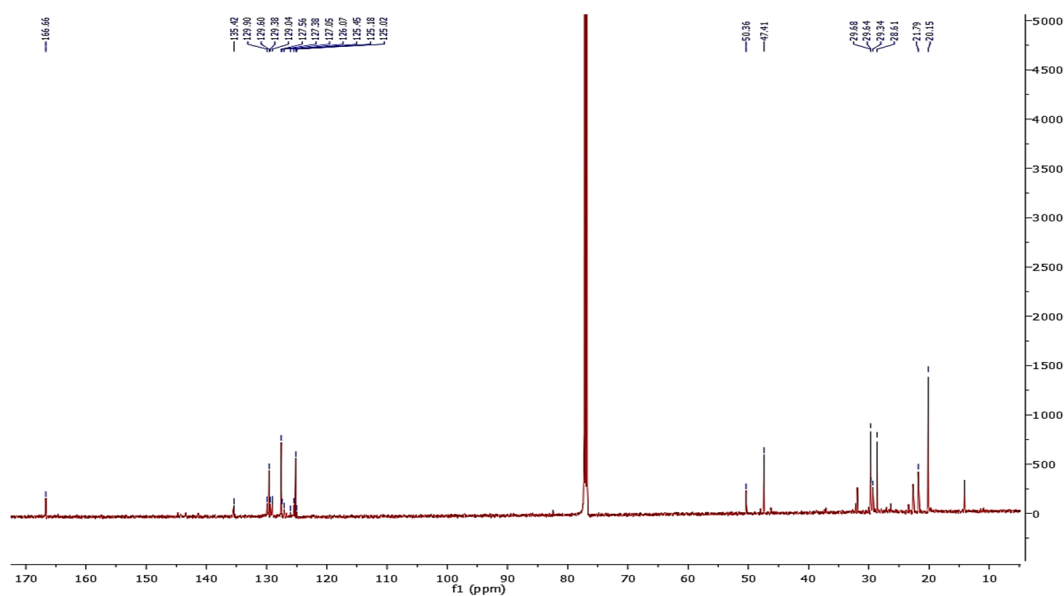

Supplement: s1 [file s1]
